# Supplementary material for: Proteomic Signatures as Biomarkers of Atherosclerosis Burden
Source: Research Square preprint supplement (doi:10.21203/rs.3.rs-6837440/v1), 2025-06-10
Supplement: Supplementary file 1 [file cba412c7b05d8956adac9919.xlsx]

## Sheet: Supplemental Table S1
Supplemental Table S1. Baseline characteristics of UK Biobank participants in the discovery dataset. Abbreviations: BMI, body mass index; LDL, low density lipoprotein; HDL, high density lipoprotein; HbA1c, Glycated hemoglobin A1c; eGFR: Estimated glomerular filtration rate.
Characteristic	Overall N = 3,332	No Atherosclerotic events N = 1,666	Atherosclerotic events N = 1,666	p value*
Age at recruitment (years), Median (Q1, Q3)	63.00 (59.00, 66.00)	63.00 (59.00, 66.00)	63.00 (59.00, 67.00)	0.933
Sex, n (%)				>0.999
Female	996 (30%)	498 (30%)	498 (30%)
Male	2,336 (70%)	1,168 (70%)	1,168 (70%)
Previous smoking, n (%)	1,476 (44%)	622 (37%)	854 (51%)	<0.001
Current smoking, n (%)	354 (11%)	131 (7.9%)	223 (13%)	<0.001
Cystatin C (mg/L), Median (Q1, Q3)	0.94 (0.86, 1.04)	0.91 (0.84, 1.00)	0.97 (0.88, 1.10)	<0.001
Cholesterol (mmol/L), Median (Q1, Q3)	5.15 (4.28, 6.01)	5.73 (5.03, 6.45)	4.51 (3.86, 5.27)	<0.001
LDL direct (mmol/L), Median (Q1, Q3)	3.16 (2.54, 3.81)	3.59 (3.06, 4.15)	2.70 (2.25, 3.26)	<0.001
HDL Cholesterol (mmol/L), Median (Q1, Q3)	1.29 (1.08, 1.54)	1.39 (1.18, 1.65)	1.18 (1.00, 1.43)	<0.001
Triglycerides (mmol/L), Median (Q1, Q3)	1.58 (1.13, 2.23)	1.50 (1.08, 2.14)	1.65 (1.17, 2.33)	<0.001
Creatinine (umol/L), Median (Q1, Q3)	76.50 (66.97, 86.60)	75.80 (66.30, 84.70)	77.35 (67.80, 88.50)	<0.001
BMI (kg/m^2), Median (Q1, Q3)	27.22 (24.71, 30.23)	26.06 (23.78, 28.64)	28.47 (25.96, 31.83)	<0.001
eGFR (ml/min/1.73m^2), Median (Q1, Q3)	89.38 (79.69, 99.12)	91.69 (83.52, 100.63)	86.57 (75.35, 96.64)	<0.001
HbA1c (mmol/L), Median (Q1, Q3)	36.60 (34.00, 39.70)	35.50 (33.10, 37.80)	38.00 (35.10, 42.10)	<0.001
Diastolic blood pressure (mmHg), Median (Q1, Q3)	81.00 (74.00, 88.00)	83.00 (76.00, 90.00)	78.00 (72.00, 86.00)	<0.001
Systolic blood pressure (mmHg), Median (Q1, Q3)	141.00 (129.00, 156.00)	144.00 (132.00, 157.00)	139.00 (126.00, 153.00)	<0.001
Blood Pressure Medication, n (%)	1,567 (47%)	285 (17%)	1,282 (77%)	<0.001
Cholesterol Lowering Medication, n (%)	1,535 (46%)	270 (16%)	1,265 (76%)	<0.001
Diabetes, n (%)	323 (9.7%)	33 (2.0%)	290 (17%)	<0.001
Hypertension, n (%)	1,678 (50%)	290 (17%)	1,388 (83%)	<0.001
*Wilcoxon rank sum test; Pearson's Chi-squared test	Wilcoxon rank sum test; Pearson's Chi-squared test	Wilcoxon rank sum test; Pearson's Chi-squared test	Wilcoxon rank sum test; Pearson's Chi-squared test	Wilcoxon rank sum test; Pearson's Chi-squared test

## Sheet: Supplemental Table S2
Supplemental Table S2. Proteins from UK Biobank and their inclusion in four proteomic panels. This table summarizes proteins (including their short names, descriptions, and UniProt IDs) from the UK Biobank proteomic dataset, indicating their inclusion across four specific proteomic panels: "Artery enriched panel (n=248)", "Atherosclerosis related panel (n=680)", "MR derived panel (n=402)", and "W…
coding	Protein Short Name (UK Biobank)	Description	UniProt ID	Artery enriched panel (n=248)	Artherosclerosis related panel (n=680)	MR derived panel (n=402)	Whole proteome panel (n=2920)
1	A1BG	Alpha-1B-glycoprotein	P04217	0	0	0	1
2	AAMDC	Mth938 domain-containing protein	Q9H7C9	0	0	1	1
3	AARSD1	Alanyl-tRNA editing protein Aarsd1	Q9BTE6	0	0	0	1
4	ABCA2	ATP-binding cassette sub-family A member 2	Q9BZC7	0	0	0	1
5	ABHD14B	Protein ABHD14B	Q96IU4	0	0	0	1
6	ABL1	Tyrosine-protein kinase ABL1	P00519	0	0	0	1
7	ABO	Histo-blood group ABO system transferase	P16442	0	1	0	1
8	ABRAXAS2	BRISC complex subunit Abraxas 2	Q15018	0	0	0	1
9	ACAA1	3-ketoacyl-CoA thiolase, peroxisomal	P09110	0	0	1	1
10	ACADM	Medium-chain specific acyl-CoA dehydrogenase, mitochondrial	P11310	0	0	0	1
11	ACADSB	Short/branched chain specific acyl-CoA dehydrogenase, mitochondrial	P45954	0	0	0	1
12	ACAN	Aggrecan core protein	P16112	1	1	0	1
13	ACE	Angiotensin-converting enzyme	P12821	0	1	0	1
14	ACE2	Angiotensin-converting enzyme 2	Q9BYF1	0	1	0	1
15	ACHE	Acetylcholinesterase	P22303	0	1	0	1
16	ACOT13	Acyl-coenzyme A thioesterase 13	Q9NPJ3	0	0	0	1
17	ACOX1	Peroxisomal acyl-coenzyme A oxidase 1	Q15067	0	0	0	1
18	ACP1	Low molecular weight phosphotyrosine protein phosphatase	P24666	0	0	0	1
19	ACP5	Tartrate-resistant acid phosphatase type 5	P13686	0	0	0	1
20	ACP6	Lysophosphatidic acid phosphatase type 6	Q9NPH0	0	0	1	1
21	ACRBP	Acrosin-binding protein	Q8NEB7	0	0	0	1
22	ACRV1	Acrosomal protein SP-10	P26436	0	0	0	1
23	ACSL1	Long-chain-fatty-acid--CoA ligase 1	P33121	0	1	0	1
24	ACTA2	Actin, aortic smooth muscle	P62736	1	0	0	1
25	ACTN2	Alpha-actinin-2	P35609	1	0	0	1
26	ACTN4	Alpha-actinin-4	O43707	0	0	0	1
27	ACVRL1	Serine/threonine-protein kinase receptor R3	P37023	0	0	0	1
28	ACY1	Aminoacylase-1	Q03154	0	0	0	1
29	ACY3	N-acyl-aromatic-L-amino acid amidohydrolase	Q96HD9	0	0	0	1
30	ACYP1	Acylphosphatase-1	P07311	0	0	0	1
31	ADA	Adenosine deaminase	P00813	0	0	0	1
32	ADA2	Adenosine deaminase 2	Q9NZK5	0	0	0	1
33	ADAM12	Disintegrin and metalloproteinase domain-containing protein 12	O43184	0	1	0	1
34	ADAM15	Disintegrin and metalloproteinase domain-containing protein 15	Q13444	0	1	0	1
35	ADAM22	Disintegrin and metalloproteinase domain-containing protein 22	Q9P0K1	0	0	1	1
36	ADAM23	Disintegrin and metalloproteinase domain-containing protein 23	O75077	0	0	1	1
37	ADAM8	Disintegrin and metalloproteinase domain-containing protein 8	P78325	0	1	0	1
38	ADAM9	Disintegrin and metalloproteinase domain-containing protein 9	Q13443	0	1	1	1
39	ADAMTS1	A disintegrin and metalloproteinase with thrombospondin motifs 1	Q9UHI8	1	1	0	1
40	ADAMTS13	A disintegrin and metalloproteinase with thrombospondin motifs 13	Q76LX8	0	0	0	1
41	ADAMTS15	A disintegrin and metalloproteinase with thrombospondin motifs 15	Q8TE58	1	0	0	1
42	ADAMTS16	A disintegrin and metalloproteinase with thrombospondin motifs 16	Q8TE57	0	0	0	1
43	ADAMTS4	A disintegrin and metalloproteinase with thrombospondin motifs 4	O75173	0	1	0	1
44	ADAMTS8	A disintegrin and metalloproteinase with thrombospondin motifs 8	Q9UP79	1	0	0	1
45	ADAMTSL2	ADAMTS-like protein 2	Q86TH1	0	0	0	1
46	ADAMTSL4	ADAMTS-like protein 4	Q6UY14	0	0	0	1
47	ADAMTSL5	ADAMTS-like protein 5	Q6ZMM2	0	0	0	1
48	ADCYAP1R1	Pituitary adenylate cyclase-activating polypeptide type I receptor	P41586	0	0	0	1
49	ADD1	Alpha-adducin	P35611	0	1	0	1
50	ADGRB3	Adhesion G protein-coupled receptor B3	O60242	0	0	1	1
51	ADGRD1	Adhesion G-protein coupled receptor D1	Q6QNK2	0	0	0	1
52	ADGRE1	Adhesion G protein-coupled receptor E1	Q14246	0	0	0	1
53	ADGRE2	Adhesion G protein-coupled receptor E2	Q9UHX3	0	0	1	1
54	ADGRE5	Adhesion G protein-coupled receptor E5	P48960	1	0	1	1
55	ADGRF5	Adhesion G protein-coupled receptor F5	Q8IZF2	0	0	0	1
56	ADGRG1	Adhesion G-protein coupled receptor G1	Q9Y653	0	0	0	1
57	ADGRG2	Adhesion G-protein coupled receptor G2	Q8IZP9	1	0	0	1
58	ADGRV1	Adhesion G-protein coupled receptor V1	Q8WXG9	0	0	0	1
59	ADH1B	All-trans-retinol dehydrogenase	P00325	1	0	0	1
60	ADH4	All-trans-retinol dehydrogenase [NAD(+)] ADH4	P08319	1	0	0	1
61	ADIPOQ	Adiponectin	Q15848	0	1	1	1
62	ADM	Pro-adrenomedullin	P35318	0	1	0	1
63	ADRA2A	Alpha-2A adrenergic receptor	P08913	0	0	0	1
64	AFAP1	Actin filament-associated protein 1	Q8N556	0	0	0	1
65	AFM	Afamin	P43652	0	0	0	1
66	AFP	Alpha-fetoprotein	P02771	0	0	0	1
67	AGBL2	Cytosolic carboxypeptidase 2	Q5U5Z8	0	0	0	1
68	AGER	Advanced glycosylation end product-specific receptor	Q15109	0	1	0	1
69	AGR2	Anterior gradient protein 2 homolog	O95994	0	0	0	1
70	AGR3	Anterior gradient protein 3	Q8TD06	0	0	0	1
71	AGRN	Agrin	O00468	0	1	0	1
72	AGRP	Agouti-related protein	O00253	0	0	1	1
73	AGT	Angiotensinogen	P01019	1	1	0	1
74	AGXT	Serine--pyruvate aminotransferase	P21549	0	1	0	1
75	AHCY	Adenosylhomocysteinase	P23526	0	1	0	1
76	AHNAK	Neuroblast differentiation-associated protein AHNAK	Q09666	0	0	0	1
77	AHNAK2	Protein AHNAK2	Q8IVF2	0	0	0	1
78	AHSA1	Activator of 90 kDa heat shock protein ATPase homolog 1	O95433	0	1	0	1
79	AHSG	Alpha-2-HS-glycoprotein	P02765	0	1	0	1
80	AHSP	Alpha-hemoglobin-stabilizing protein	Q9NZD4	0	0	1	1
81	AIDA	Axin interactor, dorsalization-associated protein	Q96BJ3	0	0	0	1
82	AIF1	Allograft inflammatory factor 1	P55008	0	1	0	1
83	AIF1L	Allograft inflammatory factor 1-like	Q9BQI0	0	1	0	1
84	AIFM1	Apoptosis-inducing factor 1, mitochondrial	O95831	0	0	0	1
85	AK1	Adenylate kinase isoenzyme 1	P00568	0	0	0	1
86	AK2	Adenylate kinase 2, mitochondrial	P54819	0	0	0	1
87	AKAP12	A-kinase anchor protein 12	Q02952	0	0	1	1
88	AKR1B1	Aldo-keto reductase family 1 member B1	P15121	0	1	0	1
89	AKR1B10	Aldo-keto reductase family 1 member B10	O60218	0	1	1	1
90	AKR1C4	Aldo-keto reductase family 1 member C4	P17516	0	0	0	1
91	AKR7L	Aflatoxin B1 aldehyde reductase member 4	Q8NHP1	0	0	0	1
92	AKT1S1	Proline-rich AKT1 substrate 1	Q96B36	0	0	0	1
93	AKT2	RAC-beta serine/threonine-protein kinase	P31751	0	1	0	1
94	AKT3	RAC-gamma serine/threonine-protein kinase	Q9Y243	0	1	0	1
95	ALCAM	CD166 antigen	Q13740	1	0	1	1
96	ALDH1A1	Retinal dehydrogenase 1	P00352	0	0	0	1
97	ALDH2	Aldehyde dehydrogenase, mitochondrial	P05091	0	1	0	1
98	ALDH3A1	Aldehyde dehydrogenase, dimeric NADP-preferring	P30838	0	0	0	1
99	ALDH5A1	Succinate-semialdehyde dehydrogenase, mitochondrial	P51649	0	0	0	1
100	ALMS1	Alstrom syndrome protein 1	Q8TCU4	0	1	1	1
101	ALPI	Intestinal-type alkaline phosphatase	P09923	0	0	0	1
102	ALPP	Alkaline phosphatase, placental type	P05187	0	0	0	1
103	AMBN	Ameloblastin	Q9NP70	0	0	0	1
104	AMBP	Protein AMBP	P02760	0	1	0	1
105	AMDHD2	N-acetylglucosamine-6-phosphate deacetylase	Q9Y303	0	0	1	1
106	AMFR	E3 ubiquitin-protein ligase AMFR	Q9UKV5	0	0	0	1
107	AMIGO1	Amphoterin-induced protein 1	Q86WK6	0	0	0	1
108	AMIGO2	Amphoterin-induced protein 2	Q86SJ2	1	0	1	1
109	AMN	Protein amnionless	Q9BXJ7	0	0	0	1
110	AMOT	Angiomotin	Q4VCS5	0	1	1	1
111	AMOTL2	Angiomotin-like protein 2	Q9Y2J4	0	0	0	1
112	AMPD3	AMP deaminase 3	Q01432	0	0	0	1
113	AMY1A_AMY1B_AMY1C	Alpha-amylase 1A_Alpha-amylase 1B_Alpha-amylase 1C	P0DUB6_P0DTE7_P0DTE8	0	0	0	1
114	AMY2A	Pancreatic alpha-amylase	P04746	0	0	0	1
115	AMY2B	Alpha-amylase 2B	P19961	0	0	1	1
116	ANG	Angiogenin	P03950	0	0	1	1
117	ANGPT1	Angiopoietin-1	Q15389	1	1	0	1
118	ANGPT2	Angiopoietin-2	O15123	1	1	0	1
119	ANGPTL1	Angiopoietin-related protein 1	O95841	1	1	1	1
120	ANGPTL2	Angiopoietin-related protein 2	Q9UKU9	0	1	0	1
121	ANGPTL3	Angiopoietin-related protein 3	Q9Y5C1	0	1	1	1
122	ANGPTL4	Angiopoietin-related protein 4	Q9BY76	0	1	0	1
123	ANGPTL7	Angiopoietin-related protein 7	O43827	1	0	1	1
124	ANK2	Ankyrin-2	Q01484	0	0	0	1
125	ANKMY2	Ankyrin repeat and MYND domain-containing protein 2	Q8IV38	0	0	0	1
126	ANKRA2	Ankyrin repeat family A protein 2	Q9H9E1	0	0	0	1
127	ANKRD54	Ankyrin repeat domain-containing protein 54	Q6NXT1	0	0	0	1
128	ANP32C	Acidic leucine-rich nuclear phosphoprotein 32 family member C	O43423	0	0	0	1
129	ANPEP	Aminopeptidase N	P15144	0	1	0	1
130	ANXA1	Annexin A1	P04083	0	0	0	1
131	ANXA10	Annexin A10	Q9UJ72	0	0	0	1
132	ANXA11	Annexin A11	P50995	0	1	0	1
133	ANXA2	Annexin A2	P07355	0	1	0	1
134	ANXA3	Annexin A3	P12429	0	0	0	1
135	ANXA4	Annexin A4	P09525	0	0	0	1
136	ANXA5	Annexin A5	P08758	0	1	0	1
137	AOC1	Amiloride-sensitive amine oxidase [copper-containing]	P19801	0	0	1	1
138	AOC3	Membrane primary amine oxidase	Q16853	1	1	0	1
139	AP1G2	AP-1 complex subunit gamma-like 2	O75843	0	0	0	1
140	AP2B1	AP-2 complex subunit beta	P63010	0	0	0	1
141	AP3B1	AP-3 complex subunit beta-1	O00203	0	0	1	1
142	AP3S2	AP-3 complex subunit sigma-2	P59780	0	0	1	1
143	APBB1IP	Amyloid beta A4 precursor protein-binding family B member 1-interacting protein	Q7Z5R6	0	1	0	1
144	APCS	Serum amyloid P-component	P02743	0	1	1	1
145	APEX1	DNA-(apurinic or apyrimidinic site) endonuclease	P27695	0	1	0	1
146	APLP1	Amyloid-like protein 1	P51693	0	0	0	1
147	APOA1	Apolipoprotein A-I	P02647	0	1	1	1
148	APOA2	Apolipoprotein A-II	P02652	0	1	0	1
149	APOA4	Apolipoprotein A-IV	P06727	0	1	1	1
150	APOB	Apolipoprotein B-100	P04114	1	1	0	1
151	APOBR	Apolipoprotein B receptor	Q0VD83	0	1	1	1
152	APOC1	Apolipoprotein C-I	P02654	0	1	1	1
153	APOD	Apolipoprotein D	P05090	0	0	1	1
154	APOE	Apolipoprotein E	P02649	0	1	0	1
155	APOF	Apolipoprotein F	Q13790	0	0	1	1
156	APOH	Beta-2-glycoprotein 1	P02749	0	1	0	1
157	APOL1	Apolipoprotein L1	O14791	0	1	0	1
158	APOM	Apolipoprotein M	O95445	0	1	0	1
159	APP	Amyloid-beta precursor protein	P05067	0	1	0	1
160	APPL2	DCC-interacting protein 13-beta	Q8NEU8	0	0	0	1
161	APRT	Adenine phosphoribosyltransferase	P07741	0	1	0	1
162	ARAF	Serine/threonine-protein kinase A-Raf	P10398	0	0	0	1
163	AREG	Amphiregulin	P15514	0	0	0	1
164	ARF6	ADP-ribosylation factor 6	P62330	0	0	0	1
165	ARFIP1	Arfaptin-1	P53367	0	0	0	1
166	ARG1	Arginase-1	P05089	0	1	0	1
167	ARG2	Arginase-2, mitochondrial	P78540	0	1	0	1
168	ARHGAP1	Rho GTPase-activating protein 1	Q07960	0	0	0	1
169	ARHGAP25	Rho GTPase-activating protein 25	P42331	0	0	0	1
170	ARHGAP30	Rho GTPase-activating protein 30	Q7Z6I6	0	0	0	1
171	ARHGAP45	Rho GTPase-activating protein 45	Q92619	0	0	0	1
172	ARHGAP5	Rho GTPase-activating protein 5	Q13017	0	0	0	1
173	ARHGEF1	Rho guanine nucleotide exchange factor 1	Q92888	0	1	0	1
174	ARHGEF10	Rho guanine nucleotide exchange factor 10	O15013	0	0	1	1
175	ARHGEF12	Rho guanine nucleotide exchange factor 12	Q9NZN5	0	0	1	1
176	ARHGEF5	Rho guanine nucleotide exchange factor 5	Q12774	0	0	0	1
177	ARID3A	AT-rich interactive domain-containing protein 3A	Q99856	0	0	0	1
178	ARID4B	AT-rich interactive domain-containing protein 4B	Q4LE39	0	0	0	1
179	ARL13B	ADP-ribosylation factor-like protein 13B	Q3SXY8	0	0	0	1
180	ARL2BP	ADP-ribosylation factor-like protein 2-binding protein	Q9Y2Y0	0	0	0	1
181	ARMCX2	Armadillo repeat-containing X-linked protein 2	Q7L311	0	0	0	1
182	ARNT	Aryl hydrocarbon receptor nuclear translocator	P27540	0	0	0	1
183	ARNTL	Aryl hydrocarbon receptor nuclear translocator-like protein 1	O00327	0	0	0	1
184	ARSA	Arylsulfatase A	P15289	0	0	0	1
185	ARSB	Arylsulfatase B	P15848	0	0	0	1
186	ART3	Ecto-ADP-ribosyltransferase 3	Q13508	0	0	0	1
187	ART5	Ecto-ADP-ribosyltransferase 5	Q96L15	0	0	0	1
188	ARTN	Artemin	Q5T4W7	0	0	0	1
189	ASAH1	Acid ceramidase	Q13510	0	0	0	1
190	ASAH2	Neutral ceramidase	Q9NR71	0	0	0	1
191	ASGR1	Asialoglycoprotein receptor 1	P07306	0	0	0	1
192	ASGR2	Asialoglycoprotein receptor 2	P07307	0	1	0	1
193	ASPN	Asporin	Q9BXN1	1	0	1	1
194	ASPSCR1	Tether containing UBX domain for GLUT4	Q9BZE9	0	0	0	1
195	ASRGL1	Isoaspartyl peptidase/L-asparaginase	Q7L266	0	0	0	1
196	ASS1	Argininosuccinate synthase	P00966	0	1	0	1
197	ATF2	Cyclic AMP-dependent transcription factor ATF-2	P15336	0	0	0	1
198	ATF4	Cyclic AMP-dependent transcription factor ATF-4	P18848	0	1	0	1
199	ATG16L1	Autophagy-related protein 16-1	Q676U5	0	1	1	1
200	ATG4A	Cysteine protease ATG4A	Q8WYN0	0	0	0	1
201	ATOX1	Copper transport protein ATOX1	O00244	0	0	0	1
202	ATP1B1	Sodium/potassium-transporting ATPase subunit beta-1	P05026	0	0	0	1
203	ATP1B2	Sodium/potassium-transporting ATPase subunit beta-2	P14415	0	0	0	1
204	ATP1B3	Sodium/potassium-transporting ATPase subunit beta-3	P54709	0	0	0	1
205	ATP1B4	Protein ATP1B4	Q9UN42	0	0	0	1
206	ATP2B4	Plasma membrane calcium-transporting ATPase 4	P23634	0	0	0	1
207	ATP5F1D	ATP synthase subunit delta, mitochondrial	P30049	0	0	0	1
208	ATP5IF1	ATPase inhibitor, mitochondrial	Q9UII2	0	0	0	1
209	ATP5PO	ATP synthase subunit O, mitochondrial	P48047	0	0	0	1
210	ATP6AP2	Renin receptor	O75787	0	0	0	1
211	ATP6V1D	V-type proton ATPase subunit D	Q9Y5K8	0	0	0	1
212	ATP6V1F	V-type proton ATPase subunit F	Q16864	0	0	0	1
213	ATP6V1G1	V-type proton ATPase subunit G 1	O75348	0	0	0	1
214	ATP6V1G2	V-type proton ATPase subunit G 2	O95670	0	0	0	1
215	ATRAID	All-trans retinoic acid-induced differentiation factor	Q6UW56	0	0	0	1
216	ATRN	Attractin, Isoform 2	O75882-2	0	0	0	1
217	ATXN10	Ataxin-10	Q9UBB4	0	1	0	1
218	ATXN2	Ataxin-2	Q99700	0	1	0	1
219	ATXN2L	Ataxin-2-like protein	Q8WWM7	0	0	0	1
220	ATXN3	Ataxin-3	P54252	0	0	0	1
221	AXIN1	Axin-1	O15169	0	1	1	1
222	AXL	Tyrosine-protein kinase receptor UFO	P30530	1	1	0	1
223	AZI2	5-azacytidine-induced protein 2	Q9H6S1	0	0	0	1
224	AZU1	Azurocidin	P20160	0	0	0	1
225	B2M	Beta-2-microglobulin	P61769	0	0	0	1
226	B3GAT3	Galactosylgalactosylxylosylprotein 3-beta-glucuronosyltransferase 3	O94766	0	0	0	1
227	B3GNT7	UDP-GlcNAc:betaGal beta-1,3-N-acetylglucosaminyltransferase 7	Q8NFL0	0	0	0	1
228	B4GALT1	Beta-1,4-galactosyltransferase 1	P15291	0	0	1	1
229	B4GAT1	Beta-1,4-glucuronyltransferase 1	O43505	0	0	0	1
230	BABAM1	BRISC and BRCA1-A complex member 1	Q9NWV8	0	0	0	1
231	BACH1	Transcription regulator protein BACH1	O14867	0	0	0	1
232	BAG3	BAG family molecular chaperone regulator 3	O95817	0	0	0	1
233	BAG4	BAG family molecular chaperone regulator 4	O95429	0	0	0	1
234	BAG6	Large proline-rich protein BAG6	P46379	0	0	0	1
235	BAIAP2	Brain-specific angiogenesis inhibitor 1-associated protein 2	Q9UQB8	0	0	0	1
236	BAMBI	BMP and activin membrane-bound inhibitor homolog	Q13145	0	0	0	1
237	BANK1	B-cell scaffold protein with ankyrin repeats	Q8NDB2	0	0	0	1
238	BAP18	Chromatin complexes subunit BAP18	Q8IXM2	0	0	1	1
239	BATF	Basic leucine zipper transcriptional factor ATF-like	Q16520	0	0	0	1
240	BAX	Apoptosis regulator BAX	Q07812	0	1	0	1
241	BCAM	Basal cell adhesion molecule	P50895	1	0	0	1
242	BCAN	Brevican core protein	Q96GW7	0	0	1	1
243	BCAT1	Branched-chain-amino-acid aminotransferase, cytosolic	P54687	0	0	0	1
244	BCAT2	Branched-chain-amino-acid aminotransferase, mitochondrial	O15382	0	0	0	1
245	BCHE	Cholinesterase	P06276	0	0	0	1
246	BCL2	Apoptosis regulator Bcl-2	P10415	0	1	0	1
247	BCL2L1	Bcl-2-like protein 1	Q07817	0	1	0	1
248	BCL2L11	Bcl-2-like protein 11, Isoform BimL	O43521-2	0	0	0	1
249	BCL2L15	Bcl-2-like protein 15	Q5TBC7	0	0	0	1
250	BCL7A	B-cell CLL/lymphoma 7 protein family member A	Q4VC05	0	1	0	1
251	BCL7B	B-cell CLL/lymphoma 7 protein family member B	Q9BQE9	0	0	0	1
252	BCR	Breakpoint cluster region protein	P11274	0	1	1	1
253	BDNF	Brain-derived neurotrophic factor	P23560	1	1	0	1
254	BECN1	Beclin-1	Q14457	0	1	0	1
255	BEX3	Protein BEX3	Q00994	0	0	0	1
256	BGLAP	Osteocalcin	P02818	0	0	0	1
257	BGN	Biglycan	P21810	1	1	0	1
258	BHLHE40	Class E basic helix-loop-helix protein 40	O14503	0	0	0	1
259	BHMT2	S-methylmethionine--homocysteine S-methyltransferase BHMT2	Q9H2M3	0	0	0	1
260	BID	BH3-interacting domain death agonist	P55957	0	1	1	1
261	BIN2	Bridging integrator 2	Q9UBW5	0	0	0	1
262	BIRC2	Baculoviral IAP repeat-containing protein 2	Q13490	0	0	0	1
263	BLMH	Bleomycin hydrolase	Q13867	0	0	0	1
264	BLNK	B-cell linker protein	Q8WV28	0	0	0	1
265	BLOC1S2	Biogenesis of lysosome-related organelles complex 1 subunit 2	Q6QNY1	0	0	0	1
266	BLOC1S3	Biogenesis of lysosome-related organelles complex 1 subunit 3	Q6QNY0	0	0	0	1
267	BLVRB	Flavin reductase	P30043	0	0	0	1
268	BMP10	Bone morphogenetic protein 10	O95393	0	0	0	1
269	BMP4	Bone morphogenetic protein 4	P12644	0	1	1	1
270	BMP6	Bone morphogenetic protein 6	P22004	0	1	0	1
271	BMPER	BMP-binding endothelial regulator protein	Q8N8U9	0	0	0	1
272	BNIP2	BCL2/adenovirus E1B 19 kDa protein-interacting protein 2	Q12982	0	0	0	1
273	BNIP3L	BCL2/adenovirus E1B 19 kDa protein-interacting protein 3-like	O60238	0	0	0	1
274	BOC	Brother of CDO	Q9BWV1	0	0	0	1
275	BOLA1	BolA-like protein 1	Q9Y3E2	0	0	0	1
276	BOLA2_BOLA2B	BolA-like protein 2	Q9H3K6	0	0	0	1
277	BPIFA2	BPI fold-containing family A member 2	Q96DR5	0	0	0	1
278	BPIFB1	BPI fold-containing family B member 1	Q8TDL5	0	0	0	1
279	BPIFB2	BPI fold-containing family B member 2	Q8N4F0	0	0	0	1
280	BRAP	BRCA1-associated protein	Q7Z569	0	0	0	1
281	BRD1	Bromodomain-containing protein 1	O95696	0	0	0	1
282	BRD2	Bromodomain-containing protein 2	P25440	0	0	0	1
283	BRD3	Bromodomain-containing protein 3	Q15059	0	0	0	1
284	BRDT	Bromodomain testis-specific protein	Q58F21	0	0	0	1
285	BRK1	Protein BRICK1	Q8WUW1	0	0	0	1
286	BRME1	Break repair meiotic recombinase recruitment factor 1	Q0VDD7	0	0	0	1
287	BRSK2	Serine/threonine-protein kinase BRSK2	Q8IWQ3	0	0	0	1
288	BSG	Basigin	P35613	0	1	0	1
289	BSND	Barttin	Q8WZ55	0	0	0	1
290	BST1	ADP-ribosyl cyclase/cyclic ADP-ribose hydrolase 2	Q10588	0	0	0	1
291	BST2	Bone marrow stromal antigen 2	Q10589	0	0	0	1
292	BTC	Probetacellulin	P35070	1	1	0	1
293	BTD	Biotinidase	P43251	0	0	0	1
294	BTLA	B- and T-lymphocyte attenuator	Q7Z6A9	0	0	0	1
295	BTN1A1	Butyrophilin subfamily 1 member A1	Q13410	0	0	0	1
296	BTN2A1	Butyrophilin subfamily 2 member A1	Q7KYR7	0	0	0	1
297	BTN3A2	Butyrophilin subfamily 3 member A2	P78410	0	0	0	1
298	BTNL10	Butyrophilin-like protein 10	A8MVZ5	0	0	0	1
299	C19orf12	Protein C19orf12	Q9NSK7	0	0	0	1
300	C1GALT1C1	C1GALT1-specific chaperone 1	Q96EU7	0	0	0	1
301	C1QA	Complement C1q subcomponent subunit A	P02745	0	0	0	1
302	C1QBP	Complement component 1 Q subcomponent-binding protein, mitochondrial	Q07021	0	1	0	1
303	C1QL2	Complement C1q-like protein 2	Q7Z5L3	0	0	0	1
304	C1QTNF1	Complement C1q tumor necrosis factor-related protein 1	Q9BXJ1	1	1	0	1
305	C1QTNF5	Complement C1q tumor necrosis factor-related protein 5	Q9BXJ0	0	0	0	1
306	C1QTNF6	Complement C1q tumor necrosis factor-related protein 6	Q9BXI9	0	0	0	1
307	C1QTNF9	Complement C1q and tumor necrosis factor-related protein 9A	P0C862	0	0	0	1
308	C1R	Complement C1r subcomponent	P00736	1	0	0	1
309	C1RL	Complement C1r subcomponent-like protein	Q9NZP8	0	1	1	1
310	C1S	Complement C1s subcomponent	P09871	0	0	1	1
311	C2	Complement C2	P06681	0	0	0	1
312	C2CD2L	Phospholipid transfer protein C2CD2L	O14523	0	0	0	1
313	C2orf69	UPF0565 protein C2orf69	Q8N8R5	0	0	0	1
314	C3	Complement C3	P01024	0	1	0	1
315	C4BPB	C4b-binding protein beta chain	P20851	0	0	0	1
316	C5	Complement C5	P01031	0	0	0	1
317	C7	Complement component C7	P10643	1	0	0	1
318	C7orf50	Uncharacterized protein C7orf50	Q9BRJ6	0	0	0	1
319	C8B	Complement component C8 beta chain	P07358	0	0	0	1
320	C9	Complement component C9	P02748	0	0	0	1
321	C9orf40	Uncharacterized protein C9orf40	Q8IXQ3	0	0	0	1
322	CA1	Carbonic anhydrase 1	P00915	0	0	0	1
323	CA11	Carbonic anhydrase-related protein 11	O75493	0	0	0	1
324	CA12	Carbonic anhydrase 12	O43570	0	0	1	1
325	CA13	Carbonic anhydrase 13	Q8N1Q1	0	0	0	1
326	CA14	Carbonic anhydrase 14	Q9ULX7	0	0	1	1
327	CA2	Carbonic anhydrase 2	P00918	0	0	0	1
328	CA3	Carbonic anhydrase 3	P07451	0	0	0	1
329	CA4	Carbonic anhydrase 4	P22748	0	0	0	1
330	CA5A	Carbonic anhydrase 5A, mitochondrial	P35218	0	0	0	1
331	CA6	Carbonic anhydrase 6	P23280	0	0	0	1
332	CA7	Carbonic anhydrase 7	P43166	0	0	0	1
333	CA8	Carbonic anhydrase-related protein	P35219	0	0	1	1
334	CA9	Carbonic anhydrase 9	Q16790	0	0	0	1
335	CABP2	Calcium-binding protein 2	Q9NPB3	0	0	0	1
336	CACNA1C	Voltage-dependent L-type calcium channel subunit alpha-1C	Q13936	1	1	0	1
337	CACNA1H	Voltage-dependent T-type calcium channel subunit alpha-1H	O95180	0	0	0	1
338	CACNB1	Voltage-dependent L-type calcium channel subunit beta-1	Q02641	0	0	0	1
339	CACNB3	Voltage-dependent L-type calcium channel subunit beta-3	P54284	0	0	0	1
340	CACYBP	Calcyclin-binding protein	Q9HB71	0	0	0	1
341	CADPS	Calcium-dependent secretion activator 1	Q9ULU8	0	0	0	1
342	CALB1	Calbindin	P05937	0	0	0	1
343	CALB2	Calretinin	P22676	0	0	0	1
344	CALCA	Calcitonin	P01258	0	0	0	1
345	CALCB	Calcitonin gene-related peptide 2	P10092	0	0	0	1
346	CALCOCO1	Calcium-binding and coiled-coil domain-containing protein 1	Q9P1Z2	0	0	1	1
347	CALCOCO2	Calcium-binding and coiled-coil domain-containing protein 2	Q13137	0	0	1	1
348	CALY	Neuron-specific vesicular protein calcyon	Q9NYX4	0	0	0	1
349	CAMKK1	Calcium/calmodulin-dependent protein kinase kinase 1	Q8N5S9	0	0	0	1
350	CAMLG	Guided entry of tail-anchored proteins factor CAMLG	P49069	0	0	0	1
351	CAMSAP1	Calmodulin-regulated spectrin-associated protein 1	Q5T5Y3	0	0	1	1
352	CANT1	Soluble calcium-activated nucleotidase 1	Q8WVQ1	0	0	0	1
353	CAPG	Macrophage-capping protein	P40121	0	1	0	1
354	CAPN3	Calpain-3	P20807	0	0	0	1
355	CAPS	Calcyphosin	Q13938	0	0	0	1
356	CARHSP1	Calcium-regulated heat-stable protein 1	Q9Y2V2	0	1	0	1
357	CASC3	Protein CASC3	O15234	0	0	0	1
358	CASP1	Caspase-1	P29466	0	1	0	1
359	CASP10	Caspase-10	Q92851	0	0	0	1
360	CASP2	Caspase-2	P42575	0	0	0	1
361	CASP3	Caspase-3	P42574	0	1	0	1
362	CASP4	Caspase-4	P49662	0	0	0	1
363	CASP7	Caspase-7	P55210	0	1	0	1
364	CASP8	Caspase-8	Q14790	0	1	0	1
365	CASP9	Caspase-9	P55211	0	1	0	1
366	CASQ2	Calsequestrin-2	O14958	1	0	0	1
367	CAT	Catalase	P04040	0	1	0	1
368	CBLIF	Cobalamin binding intrinsic factor	P27352	0	0	0	1
369	CBLN1	Cerebellin-1	P23435	0	0	0	1
370	CBLN4	Cerebellin-4	Q9NTU7	0	0	0	1
371	CBS	Cystathionine beta-synthase	P35520	0	1	0	1
372	CBX2	Chromobox protein homolog 2	Q14781	0	0	0	1
373	CC2D1A	Coiled-coil and C2 domain-containing protein 1A	Q6P1N0	0	0	1	1
374	CCAR2	Cell cycle and apoptosis regulator protein 2	Q8N163	0	1	0	1
375	CCDC134	Coiled-coil domain-containing protein 134	Q9H6E4	0	0	0	1
376	CCDC28A	Coiled-coil domain-containing protein 28A	Q8IWP9	0	0	0	1
377	CCDC50	Coiled-coil domain-containing protein 50	Q8IVM0	0	0	0	1
378	CCDC80	Coiled-coil domain-containing protein 80	Q76M96	0	0	0	1
379	CCER2	Coiled-coil domain-containing glutamate-rich protein 2	I3L3R5	0	0	0	1
380	CCL11	Eotaxin	P51671	0	1	0	1
381	CCL13	C-C motif chemokine 13	Q99616	1	0	0	1
382	CCL14	C-C motif chemokine 14	Q16627	0	0	0	1
383	CCL15	C-C motif chemokine 15	Q16663	0	1	0	1
384	CCL16	C-C motif chemokine 16	O15467	0	0	1	1
385	CCL17	C-C motif chemokine 17	Q92583	0	1	1	1
386	CCL18	C-C motif chemokine 18	P55774	0	1	0	1
387	CCL19	C-C motif chemokine 19	Q99731	1	1	0	1
388	CCL2	C-C motif chemokine 2	P13500	0	1	0	1
389	CCL20	C-C motif chemokine 20	P78556	0	1	1	1
390	CCL21	C-C motif chemokine 21	O00585	0	1	0	1
391	CCL22	C-C motif chemokine 22	O00626	0	1	1	1
392	CCL23	C-C motif chemokine 23	P55773	0	1	1	1
393	CCL24	C-C motif chemokine 24	O00175	0	0	0	1
394	CCL25	C-C motif chemokine 25	O15444	0	1	0	1
395	CCL26	C-C motif chemokine 26	Q9Y258	0	0	1	1
396	CCL27	C-C motif chemokine 27	Q9Y4X3	0	0	0	1
397	CCL28	C-C motif chemokine 28	Q9NRJ3	0	0	0	1
398	CCL3	C-C motif chemokine 3	P10147	0	1	0	1
399	CCL4	C-C motif chemokine 4	P13236	0	1	0	1
400	CCL5	C-C motif chemokine 5	P13501	0	1	0	1
401	CCL7	C-C motif chemokine 7	P80098	0	1	1	1
402	CCL8	C-C motif chemokine 8	P80075	0	1	0	1
403	CCN1	CCN family member 1	O00622	0	0	1	1
404	CCN2	CCN family member 2	P29279	0	1	0	1
405	CCN3	CCN family member 3	P48745	0	0	1	1
406	CCN4	CCN family member 4	O95388	0	0	0	1
407	CCN5	CCN family member 5	O76076	0	0	0	1
408	CCND2	G1/S-specific cyclin-D2	P30279	0	0	0	1
409	CCNE1	G1/S-specific cyclin-E1	P24864	0	0	0	1
410	CCS	Copper chaperone for superoxide dismutase	O14618	0	0	0	1
411	CCT5	T-complex protein 1 subunit epsilon	P48643	0	0	0	1
412	CD101	Immunoglobulin superfamily member 2	Q93033	0	0	0	1
413	CD109	CD109 antigen	Q6YHK3	0	1	1	1
414	CD14	Monocyte differentiation antigen CD14	P08571	0	1	0	1
415	CD160	CD160 antigen	O95971	0	0	0	1
416	CD163	Scavenger receptor cysteine-rich type 1 protein M130	Q86VB7	0	1	0	1
417	CD164	Sialomucin core protein 24	Q04900	0	0	0	1
418	CD164L2	CD164 sialomucin-like 2 protein	Q6UWJ8	0	0	0	1
419	CD177	CD177 antigen	Q8N6Q3	0	1	0	1
420	CD1C	T-cell surface glycoprotein CD1c	P29017	0	0	0	1
421	CD2	T-cell surface antigen CD2	P06729	0	0	1	1
422	CD200	OX-2 membrane glycoprotein	P41217	0	1	1	1
423	CD200R1	Cell surface glycoprotein CD200 receptor 1	Q8TD46	0	0	0	1
424	CD207	C-type lectin domain family 4 member K	Q9UJ71	0	0	0	1
425	CD209	CD209 antigen	Q9NNX6	0	0	0	1
426	CD22	B-cell receptor CD22	P20273	0	0	0	1
427	CD226	CD226 antigen	Q15762	0	0	0	1
428	CD244	Natural killer cell receptor 2B4	Q9BZW8	0	0	0	1
429	CD248	Endosialin	Q9HCU0	0	1	1	1
430	CD27	CD27 antigen	P26842	0	0	0	1
431	CD274	Programmed cell death 1 ligand 1	Q9NZQ7	0	1	0	1
432	CD276	CD276 antigen	Q5ZPR3	0	0	0	1
433	CD28	T-cell-specific surface glycoprotein CD28	P10747	1	1	0	1
434	CD2AP	CD2-associated protein	Q9Y5K6	0	0	0	1
435	CD300A	CMRF35-like molecule 8	Q9UGN4	0	0	0	1
436	CD300C	CMRF35-like molecule 6	Q08708	0	0	0	1
437	CD300E	CMRF35-like molecule 2	Q496F6	0	0	0	1
438	CD300LF	CMRF35-like molecule 1	Q8TDQ1	0	1	0	1
439	CD300LG	CMRF35-like molecule 9	Q6UXG3	0	0	1	1
440	CD302	CD302 antigen	Q8IX05	1	0	0	1
441	CD33	Myeloid cell surface antigen CD33	P20138	0	0	0	1
442	CD34	Hematopoietic progenitor cell antigen CD34	P28906	0	1	1	1
443	CD36	Platelet glycoprotein 4	P16671	0	1	0	1
444	CD38	ADP-ribosyl cyclase/cyclic ADP-ribose hydrolase 1	P28907	0	0	1	1
445	CD3D	T-cell surface glycoprotein CD3 delta chain	P04234	0	1	0	1
446	CD3E	T-cell surface glycoprotein CD3 epsilon chain	P07766	0	1	1	1
447	CD3G	T-cell surface glycoprotein CD3 gamma chain	P09693	0	1	0	1
448	CD4	T-cell surface glycoprotein CD4	P01730	0	1	1	1
449	CD40	Tumor necrosis factor receptor superfamily member 5	P25942	0	1	0	1
450	CD40LG	CD40 ligand	P29965	0	1	0	1
451	CD46	Membrane cofactor protein	P15529	0	1	0	1
452	CD48	CD48 antigen	P09326	0	0	0	1
453	CD5	T-cell surface glycoprotein CD5	P06127	0	0	0	1
454	CD55	Complement decay-accelerating factor	P08174	0	0	0	1
455	CD58	Lymphocyte function-associated antigen 3	P19256	0	0	1	1
456	CD59	CD59 glycoprotein	P13987	0	1	0	1
457	CD5L	CD5 antigen-like	O43866	0	1	0	1
458	CD6	T-cell differentiation antigen CD6	P30203	0	0	0	1
459	CD63	CD63 antigen	P08962	0	0	1	1
460	CD69	Early activation antigen CD69	Q07108	0	0	0	1
461	CD7	T-cell antigen CD7	P09564	0	0	0	1
462	CD70	CD70 antigen	P32970	0	0	0	1
463	CD72	B-cell differentiation antigen CD72	P21854	0	0	0	1
464	CD74	HLA class II histocompatibility antigen gamma chain	P04233	0	1	0	1
465	CD79B	B-cell antigen receptor complex-associated protein beta chain	P40259	0	0	0	1
466	CD80	T-lymphocyte activation antigen CD80	P33681	0	1	0	1
467	CD82	CD82 antigen	P27701	0	1	0	1
468	CD83	CD83 antigen	Q01151	0	0	0	1
469	CD84	SLAM family member 5	Q9UIB8	0	0	0	1
470	CD86	T-lymphocyte activation antigen CD86	P42081	0	1	0	1
471	CD8A	T-cell surface glycoprotein CD8 alpha chain	P01732	0	0	0	1
472	CD93	Complement component C1q receptor	Q9NPY3	0	0	1	1
473	CD99	CD99 antigen	P14209	0	0	0	1
474	CD99L2	CD99 antigen-like protein 2	Q8TCZ2	0	0	0	1
475	CDA	Cytidine deaminase	P32320	0	0	0	1
476	CDAN1	Codanin-1	Q8IWY9	0	0	0	1
477	CDC123	Cell division cycle protein 123 homolog	O75794	0	0	0	1
478	CDC25A	M-phase inducer phosphatase 1	P30304	0	0	0	1
479	CDC26	Anaphase-promoting complex subunit CDC26	Q8NHZ8	0	0	0	1
480	CDC27	Cell division cycle protein 27 homolog	P30260	0	1	1	1
481	CDC37	Hsp90 co-chaperone Cdc37	Q16543	0	0	0	1
482	CDC42BPB	Serine/threonine-protein kinase MRCK beta	Q9Y5S2	0	0	1	1
483	CDCP1	CUB domain-containing protein 1	Q9H5V8	0	0	0	1
484	CDH1	Cadherin-1	P12830	0	1	0	1
485	CDH15	Cadherin-15	P55291	0	0	0	1
486	CDH17	Cadherin-17	Q12864	1	0	0	1
487	CDH2	Cadherin-2	P19022	1	1	0	1
488	CDH22	Cadherin-22	Q9UJ99	0	0	0	1
489	CDH23	Cadherin-23	Q9H251	0	1	0	1
490	CDH3	Cadherin-3	P22223	0	0	1	1
491	CDH4	Cadherin-4	P55283	0	0	0	1
492	CDH5	Cadherin-5	P33151	0	1	1	1
493	CDH6	Cadherin-6	P55285	1	0	1	1
494	CDHR1	Cadherin-related family member 1	Q96JP9	0	0	0	1
495	CDHR2	Cadherin-related family member 2	Q9BYE9	0	0	0	1
496	CDHR5	Cadherin-related family member 5	Q9HBB8	0	0	0	1
497	CDK1	Cyclin-dependent kinase 1	P06493	0	0	0	1
498	CDK5RAP3	CDK5 regulatory subunit-associated protein 3	Q96JB5	0	0	0	1
499	CDKL5	Cyclin-dependent kinase-like 5	O76039	0	0	0	1
500	CDKN1A	Cyclin-dependent kinase inhibitor 1	P38936	0	1	1	1
501	CDKN2D	Cyclin-dependent kinase 4 inhibitor D	P55273	0	0	0	1
502	CDNF	Cerebral dopamine neurotrophic factor	Q49AH0	0	0	0	1
503	CDON	Cell adhesion molecule-related/down-regulated by oncogenes	Q4KMG0	0	1	0	1
504	CDSN	Corneodesmosin	Q15517	0	0	0	1
505	CEACAM1	Carcinoembryonic antigen-related cell adhesion molecule 1	P13688	0	0	0	1
506	CEACAM16	Carcinoembryonic antigen-related cell adhesion molecule 16	Q2WEN9	0	0	0	1
507	CEACAM18	Carcinoembryonic antigen-related cell adhesion molecule 18	A8MTB9	0	0	0	1
508	CEACAM19	Carcinoembryonic antigen-related cell adhesion molecule 19	Q7Z692	0	0	0	1
509	CEACAM20	Carcinoembryonic antigen-related cell adhesion molecule 20	Q6UY09	0	0	0	1
510	CEACAM21	Carcinoembryonic antigen-related cell adhesion molecule 21	Q3KPI0	0	0	0	1
511	CEACAM3	Carcinoembryonic antigen-related cell adhesion molecule 3	P40198	0	0	0	1
512	CEACAM5	Carcinoembryonic antigen-related cell adhesion molecule 5	P06731	0	0	0	1
513	CEACAM6	Carcinoembryonic antigen-related cell adhesion molecule 6	P40199	0	0	0	1
514	CEACAM8	Carcinoembryonic antigen-related cell adhesion molecule 8	P31997	0	0	0	1
515	CEBPA	CCAAT/enhancer-binding protein alpha	P49715	0	0	0	1
516	CEBPB	CCAAT/enhancer-binding protein beta	P17676	0	0	0	1
517	CELA2A	Chymotrypsin-like elastase family member 2A	P08217	0	1	0	1
518	CELA3A	Chymotrypsin-like elastase family member 3A	P09093	0	0	0	1
519	CELSR2	Cadherin EGF LAG seven-pass G-type receptor 2	Q9HCU4	0	1	1	1
520	CEMIP2	Cell surface hyaluronidase	Q9UHN6	0	0	0	1
521	CEND1	Cell cycle exit and neuronal differentiation protein 1	Q8N111	0	0	0	1
522	CENPF	Centromere protein F	P49454	0	0	0	1
523	CENPJ	Centromere protein J	Q9HC77	0	0	0	1
524	CEP112	Centrosomal protein of 112 kDa	Q8N8E3	0	0	0	1
525	CEP152	Centrosomal protein of 152 kDa	O94986	0	0	0	1
526	CEP164	Centrosomal protein of 164 kDa	Q9UPV0	0	0	0	1
527	CEP170	Centrosomal protein of 170 kDa	Q5SW79	0	0	0	1
528	CEP20	Centrosomal protein 20	Q96NB1	0	0	1	1
529	CEP290	Centrosomal protein of 290 kDa	O15078	0	0	0	1
530	CEP350	Centrosome-associated protein 350	Q5VT06	0	0	0	1
531	CEP43	Centrosomal protein 43	O95684	0	0	1	1
532	CEP85	Centrosomal protein of 85 kDa	Q6P2H3	0	0	1	1
533	CERT	Ceramide transfer protein	Q9Y5P4	0	0	0	1
534	CES1	Liver carboxylesterase 1	P23141	1	1	0	1
535	CES2	Cocaine esterase	O00748	0	0	0	1
536	CES3	Carboxylesterase 3	Q6UWW8	0	1	0	1
537	CETN2	Centrin-2	P41208	0	0	0	1
538	CETN3	Centrin-3	O15182	0	0	0	1
539	CFB	Complement factor B	P00751	0	0	0	1
540	CFC1	Cryptic protein	P0CG37	0	0	0	1
541	CFD	Complement factor D	P00746	0	0	0	1
542	CFH	Complement factor H	P08603	1	1	1	1
543	CFHR2	Complement factor H-related protein 2	P36980	0	0	0	1
544	CFHR4	Complement factor H-related protein 4	Q92496	0	0	1	1
545	CFHR5	Complement factor H-related protein 5	Q9BXR6	0	0	1	1
546	CFI	Complement factor I	P05156	0	0	1	1
547	CFP	Properdin	P27918	0	0	0	1
548	CGA	Glycoprotein hormones alpha chain	P01215	0	1	0	1
549	CGB3_CGB5_CGB8	Choriogonadotropin subunit beta 3	P0DN86	0	0	0	1
550	CGN	Cingulin	Q9P2M7	0	1	0	1
551	CGREF1	Cell growth regulator with EF hand domain protein 1	Q99674	0	0	0	1
552	CHAC2	Glutathione-specific gamma-glutamylcyclotransferase 2	Q8WUX2	0	0	0	1
553	CHAD	Chondroadherin	O15335	0	0	0	1
554	CHCHD10	Coiled-coil-helix-coiled-coil-helix domain-containing protein 10, mitochondrial	Q8WYQ3	0	0	0	1
555	CHCHD6	MICOS complex subunit MIC25	Q9BRQ6	0	0	0	1
556	CHEK2	Serine/threonine-protein kinase Chk2	O96017	0	0	0	1
557	CHGA	Chromogranin-A	P10645	0	0	0	1
558	CHGB	Secretogranin-1	P05060	0	0	0	1
559	CHI3L1	Chitinase-3-like protein 1	P36222	0	1	0	1
560	CHIT1	Chitotriosidase-1	Q13231	0	1	0	1
561	CHL1	Neural cell adhesion molecule L1-like protein	O00533	0	1	1	1
562	CHM	Rab proteins geranylgeranyltransferase component A 1	P24386	0	0	0	1
563	CHMP1A	Charged multivesicular body protein 1a	Q9HD42	0	0	0	1
564	CHMP6	Charged multivesicular body protein 6	Q96FZ7	0	0	0	1
565	CHP1	Calcineurin B homologous protein 1	Q99653	0	0	0	1
566	CHRDL1	Chordin-like protein 1	Q9BU40	0	0	0	1
567	CHRDL2	Chordin-like protein 2	Q6WN34	1	0	0	1
568	CHRM1	Muscarinic acetylcholine receptor M1	P11229	0	0	1	1
569	CIAPIN1	Anamorsin	Q6FI81	0	0	0	1
570	CILP	Cartilage intermediate layer protein 1	O75339	0	0	1	1
571	CINP	Cyclin-dependent kinase 2-interacting protein	Q9BW66	0	0	0	1
572	CIRBP	Cold-inducible RNA-binding protein	Q14011	0	0	0	1
573	CIT	Citron Rho-interacting kinase	O14578	0	0	0	1
574	CKAP4	Cytoskeleton-associated protein 4	Q07065	0	0	0	1
575	CKB	Creatine kinase B-type	P12277	0	0	0	1
576	CKMT1A_CKMT1B	Creatine kinase U-type, mitochondrial	P12532	0	0	0	1
577	CLASP1	CLIP-associating protein 1	Q7Z460	0	0	1	1
578	CLC	Galectin-10	Q05315	0	0	0	1
579	CLEC10A	C-type lectin domain family 10 member A	Q8IUN9	0	1	0	1
580	CLEC11A	C-type lectin domain family 11 member A	Q9Y240	0	0	0	1
581	CLEC12A	C-type lectin domain family 12 member A	Q5QGZ9	0	0	0	1
582	CLEC14A	C-type lectin domain family 14 member A	Q86T13	0	0	1	1
583	CLEC1A	C-type lectin domain family 1 member A	Q8NC01	0	0	0	1
584	CLEC1B	C-type lectin domain family 1 member B	Q9P126	0	0	0	1
585	CLEC2L	C-type lectin domain family 2 member L	P0C7M8	0	0	0	1
586	CLEC3B	Tetranectin	P05452	0	0	0	1
587	CLEC4A	C-type lectin domain family 4 member A	Q9UMR7	0	0	0	1
588	CLEC4C	C-type lectin domain family 4 member C	Q8WTT0	0	0	0	1
589	CLEC4D	C-type lectin domain family 4 member D	Q8WXI8	0	0	0	1
590	CLEC4G	C-type lectin domain family 4 member G	Q6UXB4	0	0	1	1
591	CLEC4M	C-type lectin domain family 4 member M	Q9H2X3	0	0	0	1
592	CLEC5A	C-type lectin domain family 5 member A	Q9NY25	1	0	0	1
593	CLEC6A	C-type lectin domain family 6 member A	Q6EIG7	0	0	0	1
594	CLEC7A	C-type lectin domain family 7 member A	Q9BXN2	0	0	0	1
595	CLGN	Calmegin	O14967	0	0	0	1
596	CLIC5	Chloride intracellular channel protein 5	Q9NZA1	0	0	0	1
597	CLINT1	Clathrin interactor 1	Q14677	0	0	0	1
598	CLIP2	CAP-Gly domain-containing linker protein 2	Q9UDT6	0	0	0	1
599	CLMP	CXADR-like membrane protein	Q9H6B4	0	0	0	1
600	CLNS1A	Methylosome subunit pICln	P54105	0	0	1	1
601	CLPP	ATP-dependent Clp protease proteolytic subunit, mitochondrial	Q16740	0	0	1	1
602	CLPS	Colipase	P04118	0	0	0	1
603	CLSPN	Claspin	Q9HAW4	0	0	0	1
604	CLSTN1	Calsyntenin-1	O94985	0	0	0	1
605	CLSTN2	Calsyntenin-2	Q9H4D0	0	0	1	1
606	CLSTN3	Calsyntenin-3	Q9BQT9	0	0	0	1
607	CLTA	Clathrin light chain A	P09496	0	0	0	1
608	CLU	Clusterin	P10909	1	1	0	1
609	CLUL1	Clusterin-like protein 1	Q15846	0	0	1	1
610	CMC1	COX assembly mitochondrial protein homolog	Q7Z7K0	0	0	0	1
611	CMIP	C-Maf-inducing protein	Q8IY22	0	0	1	1
612	CNDP1	Beta-Ala-His dipeptidase	Q96KN2	0	0	0	1
613	CNGB3	Cyclic nucleotide-gated cation channel beta-3	Q9NQW8	0	0	0	1
614	CNP	2',3'-cyclic-nucleotide 3'-phosphodiesterase	P09543	0	1	0	1
615	CNPY2	Protein canopy homolog 2	Q9Y2B0	0	0	0	1
616	CNPY4	Protein canopy homolog 4	Q8N129	0	0	0	1
617	CNST	Consortin	Q6PJW8	0	0	0	1
618	CNTF	Ciliary neurotrophic factor	P26441	0	0	0	1
619	CNTN1	Contactin-1	Q12860	0	0	1	1
620	CNTN2	Contactin-2	Q02246	0	0	1	1
621	CNTN3	Contactin-3	Q9P232	0	1	0	1
622	CNTN4	Contactin-4	Q8IWV2	1	0	1	1
623	CNTN5	Contactin-5	O94779	1	0	1	1
624	CNTNAP2	Contactin-associated protein-like 2	Q9UHC6	0	0	1	1
625	CNTNAP4	Contactin-associated protein-like 4	Q9C0A0	0	0	0	1
626	COCH	Cochlin	O43405	0	0	0	1
627	COL15A1	Collagen alpha-1(XV) chain	P39059	1	1	0	1
628	COL18A1	Collagen alpha-1(XVIII) chain	P39060	1	0	0	1
629	COL1A1	Collagen alpha-1(I) chain	P02452	1	0	0	1
630	COL24A1	Collagen alpha-1(XXIV) chain	Q17RW2	0	0	0	1
631	COL28A1	Collagen alpha-1(XXVIII) chain	Q2UY09	0	0	0	1
632	COL2A1	Collagen alpha-1(II) chain	P02458	0	0	0	1
633	COL3A1	Collagen alpha-1(III) chain	P02461	1	1	0	1
634	COL4A1	Collagen alpha-1(IV) chain	P02462	1	1	0	1
635	COL4A4	Collagen alpha-4(IV) chain	P53420	0	0	0	1
636	COL5A1	Collagen alpha-1(V) chain	P20908	1	0	0	1
637	COL6A3	Collagen alpha-3(VI) chain	P12111	0	0	0	1
638	COL9A1	Collagen alpha-1(IX) chain	P20849	0	0	0	1
639	COL9A2	Collagen alpha-2(IX) chain	Q14055	0	0	0	1
640	COLEC12	Collectin-12	Q5KU26	0	1	0	1
641	COMMD1	COMM domain-containing protein 1	Q8N668	0	0	0	1
642	COMMD9	COMM domain-containing protein 9	Q9P000	0	0	0	1
643	COMP	Cartilage oligomeric matrix protein	P49747	1	1	1	1
644	COMT	Catechol O-methyltransferase	P21964	0	0	0	1
645	COPB2	Coatomer subunit beta'	P35606	0	0	0	1
646	COPE	Coatomer subunit epsilon	O14579	0	0	0	1
647	COQ7	5-demethoxyubiquinone hydroxylase, mitochondrial	Q99807	0	0	0	1
648	CORO1A	Coronin-1A	P31146	0	0	0	1
649	CORO6	Coronin-6	Q6QEF8	0	0	0	1
650	COX5B	Cytochrome c oxidase subunit 5B, mitochondrial	P10606	0	0	0	1
651	COX6B1	Cytochrome c oxidase subunit 6B1	P14854	0	0	0	1
652	CPA1	Carboxypeptidase A1	P15085	0	0	0	1
653	CPA2	Carboxypeptidase A2	P48052	0	0	0	1
654	CPA4	Carboxypeptidase A4	Q9UI42	0	0	1	1
655	CPB1	Carboxypeptidase B	P15086	0	0	0	1
656	CPB2	Carboxypeptidase B2	Q96IY4	0	1	0	1
657	CPE	Carboxypeptidase E	P16870	1	0	1	1
658	CPLX2	Complexin-2	Q6PUV4	0	0	0	1
659	CPM	Carboxypeptidase M	P14384	0	0	0	1
660	CPOX	Oxygen-dependent coproporphyrinogen-III oxidase, mitochondrial	P36551	0	0	0	1
661	CPPED1	Serine/threonine-protein phosphatase CPPED1	Q9BRF8	0	0	0	1
662	CPQ	Carboxypeptidase Q	Q9Y646	0	0	0	1
663	CPTP	Ceramide-1-phosphate transfer protein	Q5TA50	0	0	0	1
664	CPVL	Probable serine carboxypeptidase CPVL	Q9H3G5	0	0	0	1
665	CPXM1	Probable carboxypeptidase X1	Q96SM3	0	0	0	1
666	CPXM2	Inactive carboxypeptidase-like protein X2	Q8N436	1	0	0	1
667	CR1	Complement receptor type 1	P17927	0	1	0	1
668	CR2	Complement receptor type 2	P20023	0	0	0	1
669	CRACR2A	EF-hand calcium-binding domain-containing protein 4B	Q9BSW2	0	0	0	1
670	CRADD	Death domain-containing protein CRADD	P78560	0	0	0	1
671	CREB3	Cyclic AMP-responsive element-binding protein 3	O43889	0	1	0	1
672	CREBZF	CREB/ATF bZIP transcription factor	Q9NS37	0	0	0	1
673	CREG1	Protein CREG1	O75629	0	1	0	1
674	CRELD1	Protein disulfide isomerase CRELD1	Q96HD1	0	0	0	1
675	CRELD2	Protein disulfide isomerase CRELD2	Q6UXH1	0	0	0	1
676	CRH	Corticoliberin	P06850	0	0	0	1
677	CRHBP	Corticotropin-releasing factor-binding protein	P24387	0	0	0	1
678	CRHR1	Corticotropin-releasing factor receptor 1	P34998	0	0	0	1
679	CRIM1	Cysteine-rich motor neuron 1 protein	Q9NZV1	1	1	1	1
680	CRIP2	Cysteine-rich protein 2	P52943	1	0	0	1
681	CRISP2	Cysteine-rich secretory protein 2	P16562	0	1	1	1
682	CRISP3	Cysteine-rich secretory protein 3	P54108	0	0	0	1
683	CRKL	Crk-like protein	P46109	0	0	0	1
684	CRLF1	Cytokine receptor-like factor 1	O75462	1	0	0	1
685	CRNN	Cornulin	Q9UBG3	0	0	0	1
686	CRTAC1	Cartilage acidic protein 1	Q9NQ79	1	0	0	1
687	CRTAM	Cytotoxic and regulatory T-cell molecule	O95727	0	0	0	1
688	CRTAP	Cartilage-associated protein	O75718	0	0	0	1
689	CRX	Cone-rod homeobox protein	O43186	0	0	0	1
690	CRYBB1	Beta-crystallin B1	P53674	0	0	0	1
691	CRYBB2	Beta-crystallin B2	P43320	0	0	0	1
692	CRYGD	Gamma-crystallin D	P07320	0	1	0	1
693	CRYM	Ketimine reductase mu-crystallin	Q14894	0	0	0	1
694	CRYZL1	Quinone oxidoreductase-like protein 1	O95825	0	0	0	1
695	CSDE1	Cold shock domain-containing protein E1	O75534	0	0	0	1
696	CSF1	Macrophage colony-stimulating factor 1	P09603	0	1	0	1
697	CSF1R	Macrophage colony-stimulating factor 1 receptor	P07333	0	1	0	1
698	CSF2	Granulocyte-macrophage colony-stimulating factor	P04141	0	1	0	1
699	CSF2RA	Granulocyte-macrophage colony-stimulating factor receptor subunit alpha	P15509	0	0	0	1
700	CSF2RB	Cytokine receptor common subunit beta	P32927	0	0	0	1
701	CSF3	Granulocyte colony-stimulating factor	P09919	0	1	1	1
702	CSF3R	Granulocyte colony-stimulating factor receptor	Q99062	0	0	0	1
703	CSH1	Chorionic somatomammotropin hormone 1	P0DML2	0	0	0	1
704	CSNK1D	Casein kinase I isoform delta	P48730	0	0	0	1
705	CSNK2A1	Casein kinase II subunit alpha	P68400	0	0	0	1
706	CSPG4	Chondroitin sulfate proteoglycan 4	Q6UVK1	1	0	1	1
707	CSPG5	Chondroitin sulfate proteoglycan 5	O95196	0	0	0	1
708	CSRP3	Cysteine and glycine-rich protein 3	P50461	0	0	1	1
709	CST1	Cystatin-SN	P01037	0	0	0	1
710	CST3	Cystatin-C	P01034	0	1	0	1
711	CST5	Cystatin-D	P28325	0	0	0	1
712	CST6	Cystatin-M	Q15828	1	0	0	1
713	CST7	Cystatin-F	O76096	0	0	0	1
714	CSTB	Cystatin-B	P04080	0	0	0	1
715	CTAG1A_CTAG1B	Cancer/testis antigen 1	P78358	0	0	0	1
716	CTBS	Di-N-acetylchitobiase	Q01459	0	1	0	1
717	CTF1	Cardiotrophin-1	Q16619	0	1	0	1
718	CTHRC1	Collagen triple helix repeat-containing protein 1	Q96CG8	1	0	1	1
719	CTLA4	Cytotoxic T-lymphocyte protein 4	P16410	0	0	0	1
720	CTNNA1	Catenin alpha-1	P35221	0	1	0	1
721	CTRB1	Chymotrypsinogen B	P17538	0	0	0	1
722	CTRC	Chymotrypsin-C	Q99895	0	0	0	1
723	CTRL	Chymotrypsin-like protease CTRL-1	P40313	0	0	0	1
724	CTSB	Cathepsin B	P07858	0	1	1	1
725	CTSC	Dipeptidyl peptidase 1	P53634	0	1	0	1
726	CTSD	Cathepsin D	P07339	0	0	1	1
727	CTSE	Cathepsin E	P14091	0	0	0	1
728	CTSF	Cathepsin F	Q9UBX1	0	0	0	1
729	CTSH	Pro-cathepsin H	P09668	0	0	0	1
730	CTSL	Cathepsin L1	P07711	0	1	0	1
731	CTSO	Cathepsin O	P43234	0	0	0	1
732	CTSS	Cathepsin S	P25774	0	1	0	1
733	CTSV	Cathepsin L2	O60911	0	0	0	1
734	CTSZ	Cathepsin Z	Q9UBR2	0	0	0	1
735	CUZD1	CUB and zona pellucida-like domain-containing protein 1	Q86UP6	0	0	0	1
736	CWC15	Spliceosome-associated protein CWC15 homolog	Q9P013	0	0	0	1
737	CX3CL1	Fractalkine	P78423	1	1	1	1
738	CXADR	Coxsackievirus and adenovirus receptor	P78310	0	0	0	1
739	CXCL1	Growth-regulated alpha protein	P09341	0	1	0	1
740	CXCL10	C-X-C motif chemokine 10	P02778	0	1	1	1
741	CXCL11	C-X-C motif chemokine 11	O14625	0	1	0	1
742	CXCL12	Stromal cell-derived factor 1	P48061	0	1	0	1
743	CXCL13	C-X-C motif chemokine 13	O43927	0	1	1	1
744	CXCL14	C-X-C motif chemokine 14	O95715	0	0	0	1
745	CXCL16	C-X-C motif chemokine 16	Q9H2A7	0	1	0	1
746	CXCL17	C-X-C motif chemokine 17	Q6UXB2	0	0	0	1
747	CXCL3	C-X-C motif chemokine 3	P19876	0	1	0	1
748	CXCL5	C-X-C motif chemokine 5	P42830	0	1	0	1
749	CXCL6	C-X-C motif chemokine 6	P80162	0	0	0	1
750	CXCL8	Interleukin-8	P10145	0	1	0	1
751	CXCL9	C-X-C motif chemokine 9	Q07325	1	1	0	1
752	CYB5A	Cytochrome b5	P00167	0	0	0	1
753	CYB5R2	NADH-cytochrome b5 reductase 2	Q6BCY4	0	0	0	1
754	CYP24A1	1,25-dihydroxyvitamin D(3) 24-hydroxylase, mitochondrial	Q07973	0	0	0	1
755	CYTH3	Cytohesin-3	O43739	0	0	0	1
756	CYTL1	Cytokine-like protein 1	Q9NRR1	1	0	0	1
757	DAAM1	Disheveled-associated activator of morphogenesis 1	Q9Y4D1	0	0	0	1
758	DAB2	Disabled homolog 2	P98082	0	0	0	1
759	DAG1	Dystroglycan	Q14118	0	1	0	1
760	DAND5	DAN domain family member 5	Q8N907	0	0	0	1
761	DAPK2	Death-associated protein kinase 2	Q9UIK4	0	1	0	1
762	DAPP1	Dual adapter for phosphotyrosine and 3-phosphotyrosine and 3-phosphoinositide	Q9UN19	0	0	0	1
763	DARS1	Aspartate--tRNA ligase, cytoplasmic	P14868	0	0	0	1
764	DBH	Dopamine beta-hydroxylase	P09172	0	0	0	1
765	DBI	Acyl-CoA-binding protein	P07108	0	0	0	1
766	DBN1	Drebrin	Q16643	0	0	0	1
767	DBNL	Drebrin-like protein	Q9UJU6	0	0	0	1
768	DCBLD2	Discoidin, CUB and LCCL domain-containing protein 2	Q96PD2	0	0	0	1
769	DCC	Netrin receptor DCC	P43146	0	0	0	1
770	DCDC2C	Doublecortin domain-containing protein 2C	A8MYV0	1	0	0	1
771	DCLRE1C	Protein artemis	Q96SD1	0	0	0	1
772	DCN	Decorin	P07585	0	1	0	1
773	DCTD	Deoxycytidylate deaminase	P32321	0	0	0	1
774	DCTN1	Dynactin subunit 1	Q14203	0	0	0	1
775	DCTN2	Dynactin subunit 2	Q13561	0	0	0	1
776	DCTN6	Dynactin subunit 6	O00399	0	1	0	1
777	DCTPP1	dCTP pyrophosphatase 1	Q9H773	0	0	0	1
778	DCUN1D1	DCN1-like protein 1	Q96GG9	0	0	0	1
779	DCUN1D2	DCN1-like protein 2	Q6PH85	0	0	0	1
780	DCXR	L-xylulose reductase	Q7Z4W1	0	0	0	1
781	DDA1	DET1- and DDB1-associated protein 1	Q9BW61	0	0	0	1
782	DDAH1	N(G),N(G)-dimethylarginine dimethylaminohydrolase 1	O94760	0	1	0	1
783	DDC	Aromatic-L-amino-acid decarboxylase	P20711	0	0	0	1
784	DDHD2	Phospholipase DDHD2	O94830	0	0	0	1
785	DDI2	Protein DDI1 homolog 2	Q5TDH0	0	0	0	1
786	DDR1	Epithelial discoidin domain-containing receptor 1	Q08345	0	1	1	1
787	DDT	D-dopachrome decarboxylase	P30046	0	0	1	1
788	DDX1	ATP-dependent RNA helicase DDX1	Q92499	0	0	0	1
789	DDX25	ATP-dependent RNA helicase DDX25	Q9UHL0	0	0	0	1
790	DDX39A	ATP-dependent RNA helicase DDX39A	O00148	0	0	0	1
791	DDX4	Probable ATP-dependent RNA helicase DDX4	Q9NQI0	0	0	0	1
792	DDX53	Probable ATP-dependent RNA helicase DDX53	Q86TM3	0	0	0	1
793	DDX58	Antiviral innate immune response receptor RIG-I	O95786	0	0	0	1
794	DECR1	2,4-dienoyl-CoA reductase, mitochondrial	Q16698	0	1	0	1
795	DEFA1_DEFA1B	Neutrophil defensin 1	P59665	0	0	0	1
796	DEFB103A_DEFB103B	Beta-defensin 103	P81534	0	0	0	1
797	DEFB104A_DEFB104B	Beta-defensin 104	Q8WTQ1	0	0	0	1
798	DEFB116	Beta-defensin 116	Q30KQ4	0	0	0	1
799	DEFB118	Beta-defensin 118	Q96PH6	0	0	0	1
800	DEFB4A_DEFB4B	Beta-defensin 4A	O15263	0	0	0	1
801	DENND2B	DENN domain-containing protein 2B	P78524	0	0	0	1
802	DENR	Density-regulated protein	O43583	0	0	0	1
803	DFFA	DNA fragmentation factor subunit alpha	O00273	0	0	0	1
804	DGCR6	Protein DGCR6	Q14129	0	0	0	1
805	DGKA	Diacylglycerol kinase alpha	P23743	0	0	0	1
806	DGKZ	Diacylglycerol kinase zeta	Q13574	0	0	0	1
807	DHODH	Dihydroorotate dehydrogenase	Q02127	0	0	0	1
808	DHPS	Deoxyhypusine synthase	P49366	0	0	0	1
809	DHRS4L2	Dehydrogenase/reductase SDR family member 4-like 2	Q6PKH6	0	0	0	1
810	DIABLO	Diablo homolog, mitochondrial	Q9NR28	0	0	0	1
811	DIPK1C	Divergent protein kinase domain 1C	Q0P6D2	0	0	0	1
812	DIPK2B	Divergent protein kinase domain 2B	Q9H7Y0	0	0	0	1
813	DKK1	Dickkopf-related protein 1	O94907	0	1	0	1
814	DKK3	Dickkopf-related protein 3	Q9UBP4	1	0	0	1
815	DKK4	Dickkopf-related protein 4	Q9UBT3	0	0	0	1
816	DKKL1	Dickkopf-like protein 1	Q9UK85	0	0	1	1
817	DLG4	Disks large homolog 4	P78352	0	1	0	1
818	DLGAP5	Disks large-associated protein 5	Q15398	0	0	0	1
819	DLK1	Protein delta homolog 1	P80370	0	1	0	1
820	DLL1	Delta-like protein 1	O00548	0	0	0	1
821	DLL4	Delta-like protein 4	Q9NR61	0	1	0	1
822	DMD	Dystrophin	P11532	1	1	0	1
823	DMP1	Dentin matrix acidic phosphoprotein 1	Q13316	1	0	0	1
824	DNAJA1	DnaJ homolog subfamily A member 1	P31689	0	0	0	1
825	DNAJA2	DnaJ homolog subfamily A member 2	O60884	0	0	0	1
826	DNAJA4	DnaJ homolog subfamily A member 4	Q8WW22	0	0	0	1
827	DNAJB1	DnaJ homolog subfamily B member 1	P25685	0	0	0	1
828	DNAJB14	DnaJ homolog subfamily B member 14	Q8TBM8	0	0	0	1
829	DNAJB2	DnaJ homolog subfamily B member 2	P25686	0	0	0	1
830	DNAJB6	DnaJ homolog subfamily B member 6	O75190	0	0	0	1
831	DNAJB8	DnaJ homolog subfamily B member 8	Q8NHS0	0	0	0	1
832	DNAJC21	DnaJ homolog subfamily C member 21	Q5F1R6	0	0	0	1
833	DNAJC6	Putative tyrosine-protein phosphatase auxilin	O75061	0	0	0	1
834	DNAJC9	DnaJ homolog subfamily C member 9	Q8WXX5	0	0	0	1
835	DNER	Delta and Notch-like epidermal growth factor-related receptor	Q8NFT8	0	1	0	1
836	DNLZ	DNL-type zinc finger protein	Q5SXM8	0	0	0	1
837	DNM1	Dynamin-1	Q05193	0	0	0	1
838	DNM3	Dynamin-3	Q9UQ16	0	0	0	1
839	DNMBP	Dynamin-binding protein	Q6XZF7	0	0	0	1
840	DNPEP	Aspartyl aminopeptidase	Q9ULA0	0	0	0	1
841	DNPH1	2'-deoxynucleoside 5'-phosphate N-hydrolase 1	O43598	0	0	1	1
842	DOC2B	Double C2-like domain-containing protein beta	Q14184	0	0	0	1
843	DOCK9	Dedicator of cytokinesis protein 9	Q9BZ29	0	0	0	1
844	DOK1	Docking protein 1	Q99704	0	0	0	1
845	DOK2	Docking protein 2	O60496	0	0	0	1
846	DPEP1	Dipeptidase 1	P16444	0	0	0	1
847	DPEP2	Dipeptidase 2	Q9H4A9	0	0	0	1
848	DPP10	Inactive dipeptidyl peptidase 10	Q8N608	0	1	1	1
849	DPP4	Dipeptidyl peptidase 4	P27487	0	1	0	1
850	DPP6	Dipeptidyl aminopeptidase-like protein 6	P42658	0	0	1	1
851	DPP7	Dipeptidyl peptidase 2	Q9UHL4	0	0	0	1
852	DPT	Dermatopontin	Q07507	1	0	0	1
853	DPY30	Protein dpy-30 homolog	Q9C005	0	0	1	1
854	DRAXIN	Draxin	Q8NBI3	0	0	0	1
855	DRG2	Developmentally-regulated GTP-binding protein 2	P55039	0	0	0	1
856	DSC2	Desmocollin-2	Q02487	0	0	0	1
857	DSCAM	Down syndrome cell adhesion molecule	O60469	0	0	0	1
858	DSG2	Desmoglein-2	Q14126	0	0	1	1
859	DSG3	Desmoglein-3	P32926	0	0	1	1
860	DSG4	Desmoglein-4	Q86SJ6	0	0	0	1
861	DTD1	D-aminoacyl-tRNA deacylase 1	Q8TEA8	0	0	0	1
862	DTNB	Dystrobrevin beta	O60941	0	0	0	1
863	DTX2	Probable E3 ubiquitin-protein ligase DTX2	Q86UW9	0	0	1	1
864	DTX3	Probable E3 ubiquitin-protein ligase DTX3	Q8N9I9	0	0	0	1
865	DTYMK	Thymidylate kinase	P23919	0	0	1	1
866	DUOX2	Dual oxidase 2	Q9NRD8	0	0	0	1
867	DUSP13	Dual specificity protein phosphatase 13 isoform A	Q6B8I1	0	0	0	1
868	DUSP29	Dual specificity phosphatase 29	Q68J44	0	0	0	1
869	DUSP3	Dual specificity protein phosphatase 3	P51452	0	0	0	1
870	DUT	Deoxyuridine 5'-triphosphate nucleotidohydrolase, mitochondrial	P33316	0	0	0	1
871	DXO	Decapping and exoribonuclease protein	O77932	0	0	0	1
872	DYNC1H1	Cytoplasmic dynein 1 heavy chain 1	Q14204	0	0	0	1
873	DYNLT1	Dynein light chain Tctex-type 1	P63172	0	0	0	1
874	DYNLT3	Dynein light chain Tctex-type 3	P51808	0	0	0	1
875	EBAG9	Receptor-binding cancer antigen expressed on SiSo cells	O00559	0	1	0	1
876	EBI3_IL27	Interleukin-27	Q14213_Q8NEV9	0	0	0	1
877	ECE1	Endothelin-converting enzyme 1	P42892	0	1	0	1
878	ECHDC3	Enoyl-CoA hydratase domain-containing protein 3, mitochondrial	Q96DC8	0	0	0	1
879	ECHS1	Enoyl-CoA hydratase, mitochondrial	P30084	0	0	1	1
880	ECI2	Enoyl-CoA delta isomerase 2	O75521	0	0	0	1
881	ECM1	Extracellular matrix protein 1	Q16610	0	0	0	1
882	ECSCR	Endothelial cell-specific chemotaxis regulator	Q19T08	0	1	0	1
883	EDA2R	Tumor necrosis factor receptor superfamily member 27	Q9HAV5	1	1	0	1
884	EDAR	Tumor necrosis factor receptor superfamily member EDAR	Q9UNE0	0	0	0	1
885	EDDM3B	Epididymal secretory protein E3-beta	P56851	0	0	0	1
886	EDEM2	ER degradation-enhancing alpha-mannosidase-like protein 2	Q9BV94	0	0	0	1
887	EDF1	Endothelial differentiation-related factor 1	O60869	0	0	0	1
888	EDIL3	EGF-like repeat and discoidin I-like domain-containing protein 3	O43854	1	0	0	1
889	EDN1	Endothelin-1	P05305	0	1	1	1
890	EDNRB	Endothelin receptor type B	P24530	0	1	0	1
891	EEF1D	Elongation factor 1-delta	P29692	0	0	1	1
892	EFCAB14	EF-hand calcium-binding domain-containing protein 14	O75071	0	0	0	1
893	EFCAB2	Dynein regulatory complex protein 8	Q5VUJ9	0	0	0	1
894	EFEMP1	EGF-containing fibulin-like extracellular matrix protein 1	Q12805	1	0	1	1
895	EFHD1	EF-hand domain-containing protein D1	Q9BUP0	1	0	0	1
896	EFNA1	Ephrin-A1	P20827	0	0	0	1
897	EFNA4	Ephrin-A4	P52798	0	0	0	1
898	EFNB2	Ephrin-B2	P52799	0	0	0	1
899	EGF	Pro-epidermal growth factor	P01133	0	1	0	1
900	EGFL7	Epidermal growth factor-like protein 7	Q9UHF1	0	0	0	1
901	EGFLAM	Pikachurin	Q63HQ2	0	0	0	1
902	EGFR	Epidermal growth factor receptor	P00533	0	1	0	1
903	EGLN1	Egl nine homolog 1	Q9GZT9	0	0	0	1
904	EHBP1	EH domain-binding protein 1	Q8NDI1	0	0	0	1
905	EHD3	EH domain-containing protein 3	Q9NZN3	0	0	0	1
906	EIF1AX	Eukaryotic translation initiation factor 1A, X-chromosomal	P47813	0	0	0	1
907	EIF2AK2	Interferon-induced, double-stranded RNA-activated protein kinase	P19525	0	0	0	1
908	EIF2AK3	Eukaryotic translation initiation factor 2-alpha kinase 3	Q9NZJ5	0	1	0	1
909	EIF2S2	Eukaryotic translation initiation factor 2 subunit 2	P20042	0	0	0	1
910	EIF4B	Eukaryotic translation initiation factor 4B	P23588	0	0	0	1
911	EIF4E	Eukaryotic translation initiation factor 4E	P06730	0	0	0	1
912	EIF4EBP1	Eukaryotic translation initiation factor 4E-binding protein 1	Q13541	0	0	0	1
913	EIF4G1	Eukaryotic translation initiation factor 4 gamma 1	Q04637	0	1	1	1
914	EIF4G3	Eukaryotic translation initiation factor 4 gamma 3	O43432	0	0	0	1
915	EIF5	Eukaryotic translation initiation factor 5	P55010	0	0	0	1
916	EIF5A	Eukaryotic translation initiation factor 5A-1	P63241	0	0	0	1
917	ELAC1	Zinc phosphodiesterase ELAC protein 1	Q9H777	0	0	0	1
918	ELAVL4	ELAV-like protein 4	P26378	0	0	0	1
919	ELN	Elastin	P15502	1	1	0	1
920	ELOA	Elongin-A	Q14241	0	0	0	1
921	ELOB	Elongin-B	Q15370	0	0	0	1
922	ENAH	Protein enabled homolog	Q8N8S7	1	0	0	1
923	ENDOU	Poly(U)-specific endoribonuclease	P21128	0	0	0	1
924	ENG	Endoglin	P17813	0	1	1	1
925	ENO1	Alpha-enolase	P06733	0	0	0	1
926	ENO2	Gamma-enolase	P09104	0	0	0	1
927	ENO3	Beta-enolase	P13929	0	0	0	1
928	ENOPH1	Enolase-phosphatase E1	Q9UHY7	0	0	0	1
929	ENOX2	Ecto-NOX disulfide-thiol exchanger 2	Q16206	0	0	0	1
930	ENPEP	Glutamyl aminopeptidase	Q07075	0	0	0	1
931	ENPP2	Ectonucleotide pyrophosphatase/phosphodiesterase family member 2	Q13822	0	0	1	1
932	ENPP5	Ectonucleotide pyrophosphatase/phosphodiesterase family member 5	Q9UJA9	0	0	1	1
933	ENPP6	Glycerophosphocholine cholinephosphodiesterase ENPP6	Q6UWR7	0	0	1	1
934	ENPP7	Ectonucleotide pyrophosphatase/phosphodiesterase family member 7	Q6UWV6	0	1	0	1
935	ENSA	Alpha-endosulfine	O43768	0	0	0	1
936	ENTPD2	Ectonucleoside triphosphate diphosphohydrolase 2	Q9Y5L3	0	0	0	1
937	ENTPD5	Ectonucleoside triphosphate diphosphohydrolase 5	O75356	0	0	0	1
938	ENTPD6	Ectonucleoside triphosphate diphosphohydrolase 6	O75354	0	0	0	1
939	ENTR1	Endosome-associated-trafficking regulator 1	Q96C92	0	0	0	1
940	EP300	Histone acetyltransferase p300	Q09472	0	1	0	1
941	EPB41L5	Band 4.1-like protein 5	Q9HCM4	0	0	1	1
942	EPCAM	Epithelial cell adhesion molecule	P16422	0	0	0	1
943	EPGN	Epigen	Q6UW88	0	0	0	1
944	EPHA1	Ephrin type-A receptor 1	P21709	0	0	0	1
945	EPHA10	Ephrin type-A receptor 10	Q5JZY3	0	0	0	1
946	EPHA2	Ephrin type-A receptor 2	P29317	0	1	1	1
947	EPHA4	Ephrin type-A receptor 4	P54764	0	0	1	1
948	EPHB4	Ephrin type-B receptor 4	P54760	0	0	1	1
949	EPHB6	Ephrin type-B receptor 6	O15197	0	0	0	1
950	EPHX2	Bifunctional epoxide hydrolase 2	P34913	0	1	0	1
951	EPN1	Epsin-1	Q9Y6I3	0	0	0	1
952	EPO	Erythropoietin	P01588	0	1	0	1
953	EPPK1	Epiplakin	P58107	0	0	0	1
954	EPS8L2	Epidermal growth factor receptor kinase substrate 8-like protein 2	Q9H6S3	0	0	0	1
955	ERBB2	Receptor tyrosine-protein kinase erbB-2	P04626	0	0	0	1
956	ERBB3	Receptor tyrosine-protein kinase erbB-3	P21860	0	0	0	1
957	ERBB4	Receptor tyrosine-protein kinase erbB-4	Q15303	1	0	1	1
958	ERBIN	Erbin	Q96RT1	0	0	0	1
959	ERC2	ERC protein 2	O15083	0	0	0	1
960	ERCC1	DNA excision repair protein ERCC-1	P07992	0	0	0	1
961	EREG	Proepiregulin	O14944	0	0	0	1
962	ERI1	3'-5' exoribonuclease 1	Q8IV48	0	0	0	1
963	ERMAP	Erythroid membrane-associated protein	Q96PL5	0	0	0	1
964	ERN1	Serine/threonine-protein kinase/endoribonuclease IRE1	O75460	0	1	0	1
965	ERP29	Endoplasmic reticulum resident protein 29	P30040	0	0	0	1
966	ERP44	Endoplasmic reticulum resident protein 44	Q9BS26	0	0	0	1
967	ERVV-1	Endogenous retrovirus group V member 1 Env polyprotein	B6SEH8	0	0	0	1
968	ESAM	Endothelial cell-selective adhesion molecule	Q96AP7	1	1	0	1
969	ESM1	Endothelial cell-specific molecule 1	Q9NQ30	1	0	0	1
970	ESPL1	Separin	Q14674	0	0	0	1
971	ESR1	Estrogen receptor	P03372	0	1	0	1
972	ESYT2	Extended synaptotagmin-2	A0FGR8	0	0	0	1
973	EVI2B	Protein EVI2B	P34910	0	0	0	1
974	EVI5	Ecotropic viral integration site 5 protein homolog	O60447	0	0	1	1
975	EVPL	Envoplakin	Q92817	0	1	0	1
976	EXOSC10	Exosome component 10	Q01780	0	0	0	1
977	EXTL1	Exostosin-like 1	Q92935	0	0	0	1
978	EZR	Ezrin	P15311	0	0	0	1
979	F10	Coagulation factor X	P00742	0	0	0	1
980	F11	Coagulation factor XI	P03951	0	0	0	1
981	F11R	Junctional adhesion molecule A	Q9Y624	0	1	1	1
982	F12	Coagulation factor XII	P00748	0	0	0	1
983	F13B	Coagulation factor XIII B chain	P05160	0	0	0	1
984	F2	Prothrombin	P00734	1	1	0	1
985	F2R	Proteinase-activated receptor 1	P25116	1	1	0	1
986	F3	Tissue factor	P13726	0	1	1	1
987	F7	Coagulation factor VII	P08709	0	1	0	1
988	F9	Coagulation factor IX	P00740	0	0	1	1
989	FABP1	Fatty acid-binding protein, liver	P07148	0	0	0	1
990	FABP2	Fatty acid-binding protein, intestinal	P12104	0	1	0	1
991	FABP3	Fatty acid-binding protein, heart	P05413	1	0	0	1
992	FABP4	Fatty acid-binding protein, adipocyte	P15090	0	1	0	1
993	FABP5	Fatty acid-binding protein 5	Q01469	0	1	0	1
994	FABP6	Gastrotropin	P51161	0	0	0	1
995	FABP9	Fatty acid-binding protein 9	Q0Z7S8	0	0	0	1
996	FADD	FAS-associated death domain protein	Q13158	0	0	0	1
997	FAM13A	Protein FAM13A	O94988	0	0	0	1
998	FAM171A2	Protein FAM171A2	A8MVW0	0	0	0	1
999	FAM171B	Protein FAM171B	Q6P995	0	0	0	1
1000	FAM172A	Cotranscriptional regulator FAM172A	Q8WUF8	0	0	0	1
1001	FAM20A	Pseudokinase FAM20A	Q96MK3	0	1	1	1
1002	FAM3B	Protein FAM3B	P58499	0	0	0	1
1003	FAM3C	Protein FAM3C	Q92520	0	0	0	1
1004	FAM3D	Protein FAM3D	Q96BQ1	0	0	0	1
1005	FAP	Prolyl endopeptidase FAP	Q12884	1	0	0	1
1006	FARSA	Phenylalanine--tRNA ligase alpha subunit	Q9Y285	0	0	0	1
1007	FAS	Tumor necrosis factor receptor superfamily member 6	P25445	0	1	0	1
1008	FASLG	Tumor necrosis factor ligand superfamily member 6	P48023	0	1	0	1
1009	FBLN2	Fibulin-2	P98095	0	0	1	1
1010	FBN2	Fibrillin-2	P35556	0	1	0	1
1011	FBP1	Fructose-1,6-bisphosphatase 1	P09467	0	0	0	1
1012	FCAMR	High affinity immunoglobulin alpha and immunoglobulin mu Fc receptor	Q8WWV6	0	0	0	1
1013	FCAR	Immunoglobulin alpha Fc receptor	P24071	0	0	0	1
1014	FCER1A	High affinity immunoglobulin epsilon receptor subunit alpha	P12319	0	0	0	1
1015	FCER2	Low affinity immunoglobulin epsilon Fc receptor	P06734	0	0	0	1
1016	FCGR2A	Low affinity immunoglobulin gamma Fc region receptor II-a	P12318	0	1	0	1
1017	FCGR2B	Low affinity immunoglobulin gamma Fc region receptor II-b	P31994	0	0	0	1
1018	FCGR3B	Low affinity immunoglobulin gamma Fc region receptor III-B	O75015	0	1	0	1
1019	FCN1	Ficolin-1	O00602	0	0	0	1
1020	FCN2	Ficolin-2	Q15485	0	0	0	1
1021	FCRL1	Fc receptor-like protein 1	Q96LA6	0	0	0	1
1022	FCRL2	Fc receptor-like protein 2	Q96LA5	0	0	0	1
1023	FCRL3	Fc receptor-like protein 3	Q96P31	0	0	0	1
1024	FCRL5	Fc receptor-like protein 5	Q96RD9	0	0	0	1
1025	FCRL6	Fc receptor-like protein 6	Q6DN72	0	1	0	1
1026	FCRLB	Fc receptor-like B	Q6BAA4	0	0	1	1
1027	FDX1	Adrenodoxin, mitochondrial	P10109	0	0	0	1
1028	FDX2	Ferredoxin-2, mitochondrial	Q6P4F2	0	0	0	1
1029	FEN1	Flap endonuclease 1	P39748	0	0	0	1
1030	FES	Tyrosine-protein kinase Fes/Fps	P07332	0	0	0	1
1031	FETUB	Fetuin-B	Q9UGM5	0	0	0	1
1032	FGA	Fibrinogen alpha chain	P02671	0	1	1	1
1033	FGD3	FYVE, RhoGEF and PH domain-containing protein 3	Q5JSP0	0	0	0	1
1034	FGF12	Fibroblast growth factor 12	P61328	0	0	0	1
1035	FGF16	Fibroblast growth factor 16	O43320	1	0	0	1
1036	FGF19	Fibroblast growth factor 19	O95750	0	0	0	1
1037	FGF2	Fibroblast growth factor 2	P09038	0	1	1	1
1038	FGF20	Fibroblast growth factor 20	Q9NP95	0	0	0	1
1039	FGF21	Fibroblast growth factor 21	Q9NSA1	0	0	0	1
1040	FGF23	Fibroblast growth factor 23	Q9GZV9	0	1	0	1
1041	FGF3	Fibroblast growth factor 3	P11487	0	0	0	1
1042	FGF5	Fibroblast growth factor 5	P12034	0	0	0	1
1043	FGF6	Fibroblast growth factor 6	P10767	0	0	0	1
1044	FGF7	Fibroblast growth factor 7	P21781	1	1	0	1
1045	FGF9	Fibroblast growth factor 9	P31371	0	0	0	1
1046	FGFBP1	Fibroblast growth factor-binding protein 1	Q14512	0	0	0	1
1047	FGFBP2	Fibroblast growth factor-binding protein 2	Q9BYJ0	0	0	0	1
1048	FGFBP3	Fibroblast growth factor-binding protein 3	Q8TAT2	0	0	1	1
1049	FGFR2	Fibroblast growth factor receptor 2	P21802	0	0	0	1
1050	FGFR4	Fibroblast growth factor receptor 4	P22455	0	0	0	1
1051	FGL1	Fibrinogen-like protein 1	Q08830	0	1	1	1
1052	FGR	Tyrosine-protein kinase Fgr	P09769	0	0	0	1
1053	FH	Fumarate hydratase, mitochondrial	P07954	0	0	0	1
1054	FHIP2A	FHF complex subunit HOOK interacting protein 2A	Q5W0V3	0	0	0	1
1055	FHIT	Bis(5'-adenosyl)-triphosphatase	P49789	0	0	0	1
1056	FIS1	Mitochondrial fission 1 protein	Q9Y3D6	0	0	0	1
1057	FKBP14	Peptidyl-prolyl cis-trans isomerase FKBP14	Q9NWM8	0	0	0	1
1058	FKBP1B	Peptidyl-prolyl cis-trans isomerase FKBP1B	P68106	0	0	0	1
1059	FKBP4	Peptidyl-prolyl cis-trans isomerase FKBP4	Q02790	0	0	0	1
1060	FKBP5	Peptidyl-prolyl cis-trans isomerase FKBP5	Q13451	0	0	0	1
1061	FKBP7	Peptidyl-prolyl cis-trans isomerase FKBP7	Q9Y680	1	0	0	1
1062	FKBPL	FK506-binding protein-like	Q9UIM3	0	0	0	1
1063	FLI1	Friend leukemia integration 1 transcription factor	Q01543	0	0	0	1
1064	FLRT2	Leucine-rich repeat transmembrane protein FLRT2	O43155	0	1	1	1
1065	FLT1	Vascular endothelial growth factor receptor 1	P17948	0	1	0	1
1066	FLT3	Receptor-type tyrosine-protein kinase FLT3	P36888	0	1	1	1
1067	FLT3LG	Fms-related tyrosine kinase 3 ligand	P49771	0	0	0	1
1068	FLT4	Vascular endothelial growth factor receptor 3	P35916	0	1	0	1
1069	FMNL1	Formin-like protein 1	O95466	0	0	1	1
1070	FMR1	Synaptic functional regulator FMR1	Q06787	0	0	0	1
1071	FN1	Fibronectin	P02751	1	1	0	1
1072	FNDC1	Fibronectin type III domain-containing protein 1	Q4ZHG4	1	1	0	1
1073	FNTA	Protein farnesyltransferase/geranylgeranyltransferase type-1 subunit alpha	P49354	0	0	0	1
1074	FOLH1	Glutamate carboxypeptidase 2	Q04609	0	0	0	1
1075	FOLR1	Folate receptor alpha	P15328	0	0	0	1
1076	FOLR2	Folate receptor beta	P14207	0	0	0	1
1077	FOLR3	Folate receptor gamma	P41439	0	0	0	1
1078	FOS	Proto-oncogene c-Fos	P01100	0	1	0	1
1079	FOSB	Protein fosB	P53539	0	0	0	1
1080	FOXJ3	Forkhead box protein J3	Q9UPW0	0	1	0	1
1081	FOXO1	Forkhead box protein O1	Q12778	0	1	0	1
1082	FOXO3	Forkhead box protein O3	O43524	0	1	0	1
1083	FRMD4B	FERM domain-containing protein 4B	Q9Y2L6	0	0	0	1
1084	FRMD7	FERM domain-containing protein 7	Q6ZUT3	1	0	0	1
1085	FRZB	Secreted frizzled-related protein 3	Q92765	1	0	0	1
1086	FSHB	Follitropin subunit beta	P01225	0	0	0	1
1087	FST	Follistatin	P19883	1	1	0	1
1088	FSTL1	Follistatin-related protein 1	Q12841	1	1	1	1
1089	FSTL3	Follistatin-related protein 3	O95633	0	0	0	1
1090	FTCD	Formimidoyltransferase-cyclodeaminase	O95954	0	0	0	1
1091	FUCA1	Tissue alpha-L-fucosidase	P04066	0	0	0	1
1092	FUOM	Fucose mutarotase	A2VDF0	0	0	0	1
1093	FURIN	Furin	P09958	0	1	0	1
1094	FUS	RNA-binding protein FUS	P35637	0	0	0	1
1095	FUT1	Galactoside alpha-(1,2)-fucosyltransferase 1	P19526	0	0	0	1
1096	FUT3_FUT5	3-galactosyl-N-acetylglucosaminide 4-alpha-L-fucosyltransferase FUT3_4-galactosyl-N-acetylglucosaminide 3-alpha-L-fucosyltransferase FUT5	P21217_Q11128	0	0	0	1
1097	FUT8	Alpha-(1,6)-fucosyltransferase	Q9BYC5	0	1	0	1
1098	FXN	Frataxin, mitochondrial	Q16595	0	0	0	1
1099	FXYD5	FXYD domain-containing ion transport regulator 5	Q96DB9	0	0	0	1
1100	FYB1	FYN-binding protein 1	O15117	0	0	0	1
1101	FZD10	Frizzled-10	Q9ULW2	0	0	0	1
1102	FZD8	Frizzled-8	Q9H461	0	0	0	1
1103	GABARAP	Gamma-aminobutyric acid receptor-associated protein	O95166	0	0	0	1
1104	GABARAPL1	Gamma-aminobutyric acid receptor-associated protein-like 1	Q9H0R8	0	0	0	1
1105	GABRA4	Gamma-aminobutyric acid receptor subunit alpha-4	P48169	1	1	0	1
1106	GAD1	Glutamate decarboxylase 1	Q99259	1	0	0	1
1107	GAD2	Glutamate decarboxylase 2	Q05329	0	0	1	1
1108	GADD45B	Growth arrest and DNA damage-inducible protein GADD45 beta	O75293	1	0	0	1
1109	GADD45GIP1	Growth arrest and DNA damage-inducible proteins-interacting protein 1	Q8TAE8	0	0	0	1
1110	GAGE2A	G antigen 2A	Q6NT46	0	0	0	1
1111	GAL	Galanin peptides	P22466	0	0	0	1
1112	GALNT10	Polypeptide N-acetylgalactosaminyltransferase 10	Q86SR1	0	0	0	1
1113	GALNT2	Polypeptide N-acetylgalactosaminyltransferase 2	Q10471	0	0	0	1
1114	GALNT3	Polypeptide N-acetylgalactosaminyltransferase 3	Q14435	0	0	0	1
1115	GALNT5	Polypeptide N-acetylgalactosaminyltransferase 5	Q7Z7M9	1	1	0	1
1116	GALNT7	N-acetylgalactosaminyltransferase 7	Q86SF2	0	0	1	1
1117	GAMT	Guanidinoacetate N-methyltransferase	Q14353	0	0	0	1
1118	GAPDH	Glyceraldehyde-3-phosphate dehydrogenase	P04406	0	1	0	1
1119	GART	Trifunctional purine biosynthetic protein adenosine-3	P22102	0	0	0	1
1120	GAS2	Growth arrest-specific protein 2	O43903	0	0	0	1
1121	GAS6	Growth arrest-specific protein 6	Q14393	1	1	0	1
1122	GASK1A	Golgi-associated kinase 1A	Q9UFP1	0	0	0	1
1123	GAST	Gastrin	P01350	0	1	1	1
1124	GATA3	Trans-acting T-cell-specific transcription factor GATA-3	P23771	0	0	0	1
1125	GATD3	Glutamine amidotransferase-like class 1 domain-containing protein 3B, mitochondrial	P0DPI2	0	0	0	1
1126	GBA	Lysosomal acid glucosylceramidase	P04062	0	0	0	1
1127	GBP1	Guanylate-binding protein 1	P32455	0	0	0	1
1128	GBP2	Guanylate-binding protein 2	P32456	0	0	0	1
1129	GBP4	Guanylate-binding protein 4	Q96PP9	0	0	0	1
1130	GBP6	Guanylate-binding protein 6	Q6ZN66	0	1	0	1
1131	GC	Vitamin D-binding protein	P02774	0	1	1	1
1132	GCC1	GRIP and coiled-coil domain-containing protein 1	Q96CN9	0	0	1	1
1133	GCG	Pro-glucagon	P01275	0	1	0	1
1134	GCHFR	GTP cyclohydrolase 1 feedback regulatory protein	P30047	0	0	0	1
1135	GCLM	Glutamate--cysteine ligase regulatory subunit	P48507	0	0	0	1
1136	GCNT1	Beta-1,3-galactosyl-O-glycosyl-glycoprotein beta-1,6-N-acetylglucosaminyltransferase	Q02742	0	0	0	1
1137	GDF15	Growth/differentiation factor 15	Q99988	0	1	1	1
1138	GDF2	Growth/differentiation factor 2	Q9UK05	0	0	0	1
1139	GDNF	Glial cell line-derived neurotrophic factor	P39905	0	0	0	1
1140	GET3	ATPase GET3	O43681	0	0	0	1
1141	GFAP	Glial fibrillary acidic protein	P14136	0	0	0	1
1142	GFER	FAD-linked sulfhydryl oxidase ALR	P55789	0	0	0	1
1143	GFOD2	Glucose-fructose oxidoreductase domain-containing protein 2	Q3B7J2	0	0	0	1
1144	GFRA1	GDNF family receptor alpha-1	P56159	0	1	0	1
1145	GFRA2	GDNF family receptor alpha-2	O00451	0	1	0	1
1146	GFRA3	GDNF family receptor alpha-3	O60609	0	1	1	1
1147	GFRAL	GDNF family receptor alpha-like	Q6UXV0	0	0	1	1
1148	GGA1	ADP-ribosylation factor-binding protein GGA1	Q9UJY5	0	0	0	1
1149	GGACT	Gamma-glutamylaminecyclotransferase	Q9BVM4	0	0	0	1
1150	GGCT	Gamma-glutamylcyclotransferase	O75223	0	0	0	1
1151	GGH	Gamma-glutamyl hydrolase	Q92820	0	1	0	1
1152	GGT1	Glutathione hydrolase 1 proenzyme	P19440	0	0	0	1
1153	GGT5	Glutathione hydrolase 5 proenzyme	P36269	0	0	0	1
1154	GH1	Somatotropin	P01241	0	1	0	1
1155	GH2	Growth hormone variant	P01242	0	0	0	1
1156	GHR	Growth hormone receptor	P10912	0	0	0	1
1157	GHRHR	Growth hormone-releasing hormone receptor	Q02643	0	1	0	1
1158	GHRL	Appetite-regulating hormone	Q9UBU3	0	1	0	1
1159	GID8	Glucose-induced degradation protein 8 homolog	Q9NWU2	0	0	0	1
1160	GIGYF2	GRB10-interacting GYF protein 2	Q6Y7W6	0	0	0	1
1161	GIMAP7	GTPase IMAP family member 7	Q8NHV1	0	0	1	1
1162	GIMAP8	GTPase IMAP family member 8	Q8ND71	0	0	0	1
1163	GIP	Gastric inhibitory polypeptide	P09681	0	1	0	1
1164	GIPC2	PDZ domain-containing protein GIPC2	Q8TF65	0	0	0	1
1165	GIPC3	PDZ domain-containing protein GIPC3	Q8TF64	0	0	0	1
1166	GIPR	Gastric inhibitory polypeptide receptor	P48546	0	0	0	1
1167	GIT1	ARF GTPase-activating protein GIT1	Q9Y2X7	0	0	1	1
1168	GJA8	Gap junction alpha-8 protein	P48165	0	0	0	1
1169	GKN1	Gastrokine-1	Q9NS71	0	0	0	1
1170	GLA	Alpha-galactosidase A	P06280	0	0	0	1
1171	GLB1	Beta-galactosidase	P16278	0	0	0	1
1172	GLI2	Zinc finger protein GLI2	P10070	0	0	0	1
1173	GLIPR1	Glioma pathogenesis-related protein 1	P48060	N/A	N/A	N/A	N/A
1174	GLO1	Lactoylglutathione lyase	Q04760	0	1	1	1
1175	GLOD4	Glyoxalase domain-containing protein 4	Q9HC38	0	0	0	1
1176	GLP1R	Glucagon-like peptide 1 receptor	P43220	0	1	0	1
1177	GLRX	Glutaredoxin-1	P35754	0	0	0	1
1178	GLRX5	Glutaredoxin-related protein 5, mitochondrial	Q86SX6	0	0	0	1
1179	GLT8D2	Glycosyltransferase 8 domain-containing protein 2	Q9H1C3	1	0	0	1
1180	GLYR1	Putative oxidoreductase GLYR1	Q49A26	0	0	0	1
1181	GM2A	Ganglioside GM2 activator	P17900	0	0	0	1
1182	GMFG	Glia maturation factor gamma	O60234	0	0	0	1
1183	GMPR	GMP reductase 1	P36959	0	0	0	1
1184	GMPR2	GMP reductase 2	Q9P2T1	0	0	0	1
1185	GNAS	Neuroendocrine secretory protein 55	O95467	0	0	0	1
1186	GNE	Bifunctional UDP-N-acetylglucosamine 2-epimerase/N-acetylmannosamine kinase	Q9Y223	0	1	0	1
1187	GNGT1	Guanine nucleotide-binding protein G(T) subunit gamma-T1	P63211	0	0	0	1
1188	GNLY	Granulysin	P22749	0	0	1	1
1189	GNPDA1	Glucosamine-6-phosphate isomerase 1	P46926	0	0	0	1
1190	GNPDA2	Glucosamine-6-phosphate isomerase 2	Q8TDQ7	0	0	0	1
1191	GOLGA3	Golgin subfamily A member 3	Q08378	0	0	1	1
1192	GOLM2	Protein GOLM2	Q6P4E1	0	0	1	1
1193	GOPC	Golgi-associated PDZ and coiled-coil motif-containing protein	Q9HD26	0	0	1	1
1194	GORASP2	Golgi reassembly-stacking protein 2	Q9H8Y8	0	0	0	1
1195	GOT1	Aspartate aminotransferase, cytoplasmic	P17174	0	0	0	1
1196	GP1BA	Platelet glycoprotein Ib alpha chain	P07359	0	0	0	1
1197	GP1BB	Platelet glycoprotein Ib beta chain	P13224	0	0	0	1
1198	GP2	Pancreatic secretory granule membrane major glycoprotein GP2	P55259	0	1	0	1
1199	GP5	Platelet glycoprotein V	P40197	0	0	0	1
1200	GP6	Platelet glycoprotein VI	Q9HCN6	0	1	0	1
1201	GPA33	Cell surface A33 antigen	Q99795	0	0	0	1
1202	GPC1	Glypican-1	P35052	0	1	1	1
1203	GPC5	Glypican-5	P78333	1	0	0	1
1204	GPD1	Glycerol-3-phosphate dehydrogenase	P21695	0	0	0	1
1205	GPHA2	Glycoprotein hormone alpha-2	Q96T91	0	0	1	1
1206	GPI	Glucose-6-phosphate isomerase	P06744	0	1	0	1
1207	GPIHBP1	Glycosylphosphatidylinositol-anchored high density lipoprotein-binding protein 1	Q8IV16	0	0	0	1
1208	GPKOW	G-patch domain and KOW motifs-containing protein	Q92917	0	0	1	1
1209	GPNMB	Transmembrane glycoprotein NMB	Q14956	1	0	0	1
1210	GPR101	Probable G-protein coupled receptor 101	Q96P66	0	0	0	1
1211	GPR158	Probable G-protein coupled receptor 158	Q5T848	0	0	0	1
1212	GPR15L	Protein GPR15L	Q6UWK7	0	0	0	1
1213	GPR37	Prosaposin receptor GPR37	O15354	0	0	1	1
1214	GPRC5C	G-protein coupled receptor family C group 5 member C	Q9NQ84	1	0	1	1
1215	GRAP2	GRB2-related adapter protein 2	O75791	0	1	0	1
1216	GRHPR	Glyoxylate reductase/hydroxypyruvate reductase	Q9UBQ7	0	0	0	1
1217	GRIK2	Glutamate receptor ionotropic, kainate 2	Q13002	0	0	0	1
1218	GRIN2B	Glutamate receptor ionotropic, NMDA 2B	Q13224	0	0	0	1
1219	GRK5	G protein-coupled receptor kinase 5	P34947	1	0	0	1
1220	GRN	Progranulin	P28799	0	1	1	1
1221	GRP	Gastrin-releasing peptide	P07492	0	0	0	1
1222	GRPEL1	GrpE protein homolog 1, mitochondrial	Q9HAV7	0	0	0	1
1223	GRSF1	G-rich sequence factor 1	Q12849	0	0	0	1
1224	GSAP	Gamma-secretase-activating protein	A4D1B5	0	0	0	1
1225	GSN	Gelsolin	P06396	0	0	1	1
1226	GSR	Glutathione reductase, mitochondrial	P00390	0	1	0	1
1227	GSTA1	Glutathione S-transferase A1	P08263	0	1	0	1
1228	GSTA3	Glutathione S-transferase A3	Q16772	0	1	0	1
1229	GSTM4	Glutathione S-transferase Mu 4	Q03013	0	1	0	1
1230	GSTP1	Glutathione S-transferase P	P09211	0	1	0	1
1231	GSTT2B	Glutathione S-transferase theta-2B	P0CG30	0	1	0	1
1232	GTF2IRD1	General transcription factor II-I repeat domain-containing protein 1	Q9UHL9	0	0	0	1
1233	GTPBP2	GTP-binding protein 2	Q9BX10	0	0	0	1
1234	GUCA2A	Guanylin	Q02747	0	1	0	1
1235	GUCY2C	Heat-stable enterotoxin receptor	P25092	0	0	0	1
1236	GUK1	Guanylate kinase	Q16774	0	0	0	1
1237	GUSB	Beta-glucuronidase	P08236	0	0	0	1
1238	GYS1	Glycogen [starch] synthase, muscle	P13807	0	0	1	1
1239	GZMA	Granzyme A	P12544	0	0	0	1
1240	GZMB	Granzyme B	P10144	0	1	0	1
1241	GZMH	Granzyme H	P20718	0	0	0	1
1242	H2AP	Huntingtin-interacting protein M	O75409	0	0	0	1
1243	HADH	Hydroxyacyl-coenzyme A dehydrogenase, mitochondrial	Q16836	0	0	0	1
1244	HAGH	Hydroxyacylglutathione hydrolase, mitochondrial	Q16775	0	0	0	1
1245	HAO1	Hydroxyacid oxidase 1	Q9UJM8	0	0	0	1
1246	HARS1	Histidine--tRNA ligase, cytoplasmic	P12081	0	0	0	1
1247	HAVCR1	Hepatitis A virus cellular receptor 1	Q96D42	0	0	0	1
1248	HAVCR2	Hepatitis A virus cellular receptor 2	Q8TDQ0	0	0	0	1
1249	HBEGF	Proheparin-binding EGF-like growth factor	Q99075	0	1	0	1
1250	HBQ1	Hemoglobin subunit theta-1	P09105	0	0	0	1
1251	HBZ	Hemoglobin subunit zeta	P02008	0	0	1	1
1252	HCG22	Protein PBMUCL2	E2RYF7	0	0	0	1
1253	HCLS1	Hematopoietic lineage cell-specific protein	P14317	0	0	0	1
1254	HDAC8	Histone deacetylase 8	Q9BY41	0	0	0	1
1255	HDAC9	Histone deacetylase 9	Q9UKV0	0	1	0	1
1256	HDDC2	5'-deoxynucleotidase HDDC2	Q7Z4H3	0	0	0	1
1257	HDGF	Hepatoma-derived growth factor	P51858	0	0	0	1
1258	HDGFL2	Hepatoma-derived growth factor-related protein 2	Q7Z4V5	0	0	1	1
1259	HEBP1	Heme-binding protein 1	Q9NRV9	0	0	0	1
1260	HEG1	Protein HEG homolog 1	Q9ULI3	0	0	0	1
1261	HEPACAM2	HEPACAM family member 2	A8MVW5	0	0	1	1
1262	HEPH	Hephaestin	Q9BQS7	1	0	0	1
1263	HEXIM1	Protein HEXIM1	O94992	0	0	1	1
1264	HGF	Hepatocyte growth factor	P14210	1	1	0	1
1265	HGFAC	Hepatocyte growth factor activator	Q04756	0	0	0	1
1266	HGS	Hepatocyte growth factor-regulated tyrosine kinase substrate	O14964	0	1	0	1
1267	HHEX	Hematopoietically-expressed homeobox protein HHEX	Q03014	0	0	1	1
1268	HIF1A	Hypoxia-inducible factor 1-alpha	Q16665	0	1	0	1
1269	HIP1	Huntingtin-interacting protein 1	O00291	0	0	0	1
1270	HIP1R	Huntingtin-interacting protein 1-related protein	O75146	0	0	0	1
1271	HJV	Hemojuvelin	Q6ZVN8	0	0	1	1
1272	HK2	Hexokinase-2	P52789	0	0	0	1
1273	HLA-A	HLA class I histocompatibility antigen, A alpha chain	P04439	0	0	0	1
1274	HLA-DRA	HLA class II histocompatibility antigen, DR alpha chain	P01903	0	0	1	1
1275	HLA-E	HLA class I histocompatibility antigen, alpha chain E	P13747	0	0	1	1
1276	HMBS	Porphobilinogen deaminase	P08397	0	0	0	1
1277	HMCN2	Hemicentin-2	Q8NDA2	0	0	1	1
1278	HMGCL	Hydroxymethylglutaryl-CoA lyase, mitochondrial	P35914	0	0	0	1
1279	HMGCS1	Hydroxymethylglutaryl-CoA synthase, cytoplasmic	Q01581	0	0	0	1
1280	HMMR	Hyaluronan mediated motility receptor	O75330	0	0	0	1
1281	HMOX1	Heme oxygenase 1	P09601	0	1	0	1
1282	HMOX2	Heme oxygenase 2	P30519	0	0	1	1
1283	HNF1A	Hepatocyte nuclear factor 1-alpha	P20823	0	1	0	1
1284	HNMT	Histamine N-methyltransferase	P50135	0	0	0	1
1285	HNRNPK	Heterogeneous nuclear ribonucleoprotein K	P61978	0	0	0	1
1286	HNRNPUL1	Heterogeneous nuclear ribonucleoprotein U-like protein 1	Q9BUJ2	0	0	0	1
1287	HPCAL1	Hippocalcin-like protein 1	P37235	0	0	0	1
1288	HPGDS	Hematopoietic prostaglandin D synthase	O60760	0	1	0	1
1289	HPSE	Heparanase	Q9Y251	0	1	0	1
1290	HRAS	GTPase Hras	P01112	0	1	0	1
1291	HRC	Sarcoplasmic reticulum histidine-rich calcium-binding protein	P23327	1	0	0	1
1292	HRG	Histidine-rich glycoprotein	P04196	0	0	0	1
1293	HS1BP3	HCLS1-binding protein 3	Q53T59	0	0	0	1
1294	HS3ST3B1	Heparan sulfate glucosamine 3-O-sulfotransferase 3B1	Q9Y662	0	0	0	1
1295	HS6ST1	Heparan-sulfate 6-O-sulfotransferase 1	O60243	0	0	0	1
1296	HS6ST2	Heparan-sulfate 6-O-sulfotransferase 2	Q96MM7	0	0	0	1
1297	HSBP1	Heat shock factor-binding protein 1	O75506	0	0	0	1
1298	HSD11B1	Corticosteroid 11-beta-dehydrogenase isozyme 1	P28845	0	1	1	1
1299	HSD17B14	17-beta-hydroxysteroid dehydrogenase 14	Q9BPX1	0	0	1	1
1300	HSD17B3	Testosterone 17-beta-dehydrogenase 3	P37058	0	0	0	1
1301	HSDL2	Hydroxysteroid dehydrogenase-like protein 2	Q6YN16	0	1	0	1
1302	HSP90B1	Endoplasmin	P14625	0	1	0	1
1303	HSPA1A	Heat shock 70 kDa protein 1A	P0DMV8	0	1	0	1
1304	HSPA2	Heat shock-related 70 kDa protein 2	P54652	0	1	0	1
1305	HSPB1	Heat shock protein beta-1	P04792	1	1	0	1
1306	HSPB6	Heat shock protein beta-6	O14558	1	0	0	1
1307	HSPG2	Basement membrane-specific heparan sulfate proteoglycan core protein	P98160	1	1	0	1
1308	HTR1A	5-hydroxytryptamine receptor 1A	P08908	0	0	0	1
1309	HTR1B	5-hydroxytryptamine receptor 1B	P28222	1	1	0	1
1310	HTRA2	Serine protease HTRA2, mitochondrial	O43464	0	0	0	1
1311	HYAL1	Hyaluronidase-1	Q12794	0	0	1	1
1312	HYOU1	Hypoxia up-regulated protein 1	Q9Y4L1	0	0	0	1
1313	ICA1	Islet cell autoantigen 1	Q05084	0	1	0	1
1314	ICAM1	Intercellular adhesion molecule 1	P05362	0	1	0	1
1315	ICAM2	Intercellular adhesion molecule 2	P13598	0	1	0	1
1316	ICAM3	Intercellular adhesion molecule 3	P32942	0	0	0	1
1317	ICAM4	Intercellular adhesion molecule 4	Q14773	0	0	0	1
1318	ICAM5	Intercellular adhesion molecule 5	Q9UMF0	0	0	0	1
1319	ICOSLG	ICOS ligand	O75144	0	0	1	1
1320	ID4	DNA-binding protein inhibitor ID-4	P47928	1	0	0	1
1321	IDI2	Isopentenyl-diphosphate delta-isomerase 2	Q9BXS1	0	0	0	1
1322	IDO1	Indoleamine 2,3-dioxygenase 1	P14902	0	1	1	1
1323	IDS	Iduronate 2-sulfatase	P22304	0	0	0	1
1324	IDUA	Alpha-L-iduronidase	P35475	0	0	0	1
1325	IFI30	Gamma-interferon-inducible lysosomal thiol reductase	P13284	0	0	1	1
1326	IFIT1	Interferon-induced protein with tetratricopeptide repeats 1	P09914	0	0	0	1
1327	IFIT3	Interferon-induced protein with tetratricopeptide repeats 3	O14879	0	0	0	1
1328	IFNAR1	Interferon alpha/beta receptor 1	P17181	0	0	0	1
1329	IFNG	Interferon gamma	P01579	0	1	0	1
1330	IFNGR1	Interferon gamma receptor 1	P15260	0	1	1	1
1331	IFNGR2	Interferon gamma receptor 2	P38484	0	1	0	1
1332	IFNL1	Interferon lambda-1	Q8IU54	0	0	0	1
1333	IFNL2	Interferon lambda-2	Q8IZJ0	0	0	0	1
1334	IFNLR1	Interferon lambda receptor 1	Q8IU57	0	0	0	1
1335	IFNW1	Interferon omega-1	P05000	0	0	0	1
1336	IFT20	Intraflagellar transport protein 20 homolog	Q8IY31	0	0	0	1
1337	IGBP1	Immunoglobulin-binding protein 1	P78318	0	0	0	1
1338	IGDCC3	Immunoglobulin superfamily DCC subclass member 3	Q8IVU1	0	0	0	1
1339	IGDCC4	Immunoglobulin superfamily DCC subclass member 4	Q8TDY8	0	0	1	1
1340	IGF1R	Insulin-like growth factor 1 receptor	P08069	0	1	0	1
1341	IGF2BP3	Insulin-like growth factor 2 mRNA-binding protein 3	O00425	0	0	0	1
1342	IGF2R	Cation-independent mannose-6-phosphate receptor	P11717	0	1	0	1
1343	IGFBP1	Insulin-like growth factor-binding protein 1	P08833	0	1	0	1
1344	IGFBP2	Insulin-like growth factor-binding protein 2	P18065	1	1	0	1
1345	IGFBP3	Insulin-like growth factor-binding protein 3	P17936	1	1	0	1
1346	IGFBP4	Insulin-like growth factor-binding protein 4	P22692	0	0	0	1
1347	IGFBP6	Insulin-like growth factor-binding protein 6	P24592	1	0	0	1
1348	IGFBP7	Insulin-like growth factor-binding protein 7	Q16270	1	1	0	1
1349	IGFBPL1	Insulin-like growth factor-binding protein-like 1	Q8WX77	1	0	1	1
1350	IGFL4	Insulin growth factor-like family member 4	Q6B9Z1	0	1	0	1
1351	IGHMBP2	DNA-binding protein SMUBP-2	P38935	0	0	0	1
1352	IGLC2	Immunoglobulin lambda constant 2	P0DOY2	0	0	0	1
1353	IGLON5	IgLON family member 5	A6NGN9	0	0	0	1
1354	IGSF21	Immunoglobulin superfamily member 21	Q96ID5	0	0	0	1
1355	IGSF3	Immunoglobulin superfamily member 3	O75054	0	0	0	1
1356	IGSF8	Immunoglobulin superfamily member 8	Q969P0	0	0	0	1
1357	IGSF9	Protein turtle homolog A	Q9P2J2	0	0	0	1
1358	IKBKG	NF-kappa-B essential modulator	Q9Y6K9	0	1	1	1
1359	IKZF2	Zinc finger protein Helios	Q9UKS7	0	0	0	1
1360	IL10	Interleukin-10	P22301	0	1	1	1
1361	IL10RA	Interleukin-10 receptor subunit alpha	Q13651	0	0	0	1
1362	IL10RB	Interleukin-10 receptor subunit beta	Q08334	0	0	0	1
1363	IL11	Interleukin-11	P20809	0	1	0	1
1364	IL12A_IL12B	Interleukin-12	P29459_P29460	0	0	0	1
1365	IL12B	Interleukin-12 subunit beta	P29460	0	1	0	1
1366	IL12RB1	Interleukin-12 receptor subunit beta-1	P42701	0	1	0	1
1367	IL12RB2	Interleukin-12 receptor subunit beta-2	Q99665	0	1	0	1
1368	IL13	Interleukin-13	P35225	0	1	0	1
1369	IL13RA1	Interleukin-13 receptor subunit alpha-1	P78552	0	0	0	1
1370	IL13RA2	Interleukin-13 receptor subunit alpha-2	Q14627	1	0	0	1
1371	IL15	Interleukin-15	P40933	0	1	0	1
1372	IL15RA	Interleukin-15 receptor subunit alpha	Q13261	0	0	1	1
1373	IL16	Pro-interleukin-16	Q14005	0	0	0	1
1374	IL17A	Interleukin-17A	Q16552	0	1	0	1
1375	IL17C	Interleukin-17C	Q9P0M4	0	0	0	1
1376	IL17D	Interleukin-17D	Q8TAD2	0	1	0	1
1377	IL17F	Interleukin-17F	Q96PD4	0	1	0	1
1378	IL17RA	Interleukin-17 receptor A	Q96F46	0	0	0	1
1379	IL17RB	Interleukin-17 receptor B	Q9NRM6	0	0	1	1
1380	IL18	Interleukin-18	Q14116	0	1	0	1
1381	IL18BP	Interleukin-18-binding protein	O95998	0	1	0	1
1382	IL18R1	Interleukin-18 receptor 1	Q13478	0	1	0	1
1383	IL18RAP	Interleukin-18 receptor accessory protein	O95256	0	1	0	1
1384	IL19	Interleukin-19	Q9UHD0	0	1	0	1
1385	IL1A	Interleukin-1 alpha	P01583	0	1	0	1
1386	IL1B	Interleukin-1 beta	P01584	0	1	0	1
1387	IL1R1	Interleukin-1 receptor type 1	P14778	0	1	1	1
1388	IL1R2	Interleukin-1 receptor type 2	P27930	0	1	0	1
1389	IL1RAP	Interleukin-1 receptor accessory protein	Q9NPH3	0	0	0	1
1390	IL1RL1	Interleukin-1 receptor-like 1	Q01638	0	1	0	1
1391	IL1RL2	Interleukin-1 receptor-like 2	Q9HB29	0	0	0	1
1392	IL1RN	Interleukin-1 receptor antagonist protein	P18510	0	1	0	1
1393	IL2	Interleukin-2	P60568	0	1	0	1
1394	IL20	Interleukin-20	Q9NYY1	0	1	0	1
1395	IL20RA	Interleukin-20 receptor subunit alpha	Q9UHF4	0	0	0	1
1396	IL20RB	Interleukin-20 receptor subunit beta	Q6UXL0	0	0	0	1
1397	IL21R	Interleukin-21 receptor	Q9HBE5	0	0	0	1
1398	IL22	Interleukin-22	Q9GZX6	0	0	0	1
1399	IL22RA1	Interleukin-22 receptor subunit alpha-1	Q8N6P7	0	0	0	1
1400	IL24	Interleukin-24	Q13007	0	0	0	1
1401	IL25	Interleukin-25	Q9H293	0	1	0	1
1402	IL2RA	Interleukin-2 receptor subunit alpha	P01589	0	1	0	1
1403	IL2RB	Interleukin-2 receptor subunit beta	P14784	0	1	0	1
1404	IL2RG	Cytokine receptor common subunit gamma	P31785	0	1	0	1
1405	IL3	Interleukin-3	P08700	0	1	0	1
1406	IL31	Interleukin-31	Q6EBC2	0	0	0	1
1407	IL31RA	Interleukin-31 receptor subunit alpha	Q8NI17	1	0	0	1
1408	IL32	Interleukin-32	P24001	0	1	0	1
1409	IL33	Interleukin-33	O95760	1	1	0	1
1410	IL34	Interleukin-34	Q6ZMJ4	0	0	0	1
1411	IL36A	Interleukin-36 alpha	Q9UHA7	0	0	0	1
1412	IL36G	Interleukin-36 gamma	Q9NZH8	0	0	0	1
1413	IL3RA	Interleukin-3 receptor subunit alpha	P26951	0	0	0	1
1414	IL4	Interleukin-4	P05112	0	1	0	1
1415	IL4R	Interleukin-4 receptor subunit alpha	P24394	0	0	0	1
1416	IL5	Interleukin-5	P05113	0	1	0	1
1417	IL5RA	Interleukin-5 receptor subunit alpha	Q01344	0	0	0	1
1418	IL6	Interleukin-6	P05231	0	1	0	1
1419	IL6R	Interleukin-6 receptor subunit alpha	P08887	0	1	0	1
1420	IL6ST	Interleukin-6 receptor subunit beta	P40189	0	1	1	1
1421	IL7	Interleukin-7	P13232	0	1	0	1
1422	IL7R	Interleukin-7 receptor subunit alpha	P16871	0	0	1	1
1423	IL9	Interleukin-9	P15248	0	1	1	1
1424	ILKAP	Integrin-linked kinase-associated serine/threonine phosphatase 2C	Q9H0C8	0	0	0	1
1425	IMMT	MICOS complex subunit MIC60	Q16891	0	0	0	1
1426	IMPA1	Inositol monophosphatase 1	P29218	0	0	0	1
1427	IMPACT	Protein IMPACT	Q9P2X3	0	0	0	1
1428	IMPG1	Interphotoreceptor matrix proteoglycan 1	Q17R60	0	0	0	1
1429	ING1	Inhibitor of growth protein 1	Q9UK53	0	0	0	1
1430	INHBB	Inhibin beta B chain	P09529	0	0	0	1
1431	INHBC	Inhibin beta C chain	P55103	0	0	0	1
1432	INPP1	Inositol polyphosphate 1-phosphatase	P49441	0	0	0	1
1433	INPP5D	Phosphatidylinositol 3,4,5-trisphosphate 5-phosphatase 1	Q92835	0	1	1	1
1434	INPP5J	Phosphatidylinositol 4,5-bisphosphate 5-phosphatase A	Q15735	0	0	0	1
1435	INPPL1	Phosphatidylinositol 3,4,5-trisphosphate 5-phosphatase 2	O15357	0	0	0	1
1436	INSL3	Insulin-like 3	P51460	0	0	0	1
1437	INSL4	Early placenta insulin-like peptide	Q14641	0	0	0	1
1438	INSL5	Insulin-like peptide INSL5	Q9Y5Q6	0	0	0	1
1439	INSR	Insulin receptor	P06213	0	1	0	1
1440	IPCEF1	Interactor protein for cytohesin exchange factors 1	Q8WWN9	0	0	0	1
1441	IQGAP2	Ras GTPase-activating-like protein IQGAP2	Q13576	0	0	0	1
1442	IRAG2	Inositol 1,4,5-triphosphate receptor associated 2	Q12912	0	0	0	1
1443	IRAK1	Interleukin-1 receptor-associated kinase 1	P51617	0	1	0	1
1444	IRAK4	Interleukin-1 receptor-associated kinase 4	Q9NWZ3	0	1	0	1
1445	ISLR2	Immunoglobulin superfamily containing leucine-rich repeat protein 2	Q6UXK2	0	0	0	1
1446	ISM1	Isthmin-1	B1AKI9	1	0	1	1
1447	ISM2	Isthmin-2	Q6H9L7	0	0	1	1
1448	IST1	IST1 homolog	P53990	0	0	0	1
1449	ITGA11	Integrin alpha-11	Q9UKX5	1	0	1	1
1450	ITGA2	Integrin alpha-2	P17301	0	1	1	1
1451	ITGA5	Integrin alpha-5	P08648	1	0	0	1
1452	ITGA6	Integrin alpha-6	P23229	0	0	0	1
1453	ITGAL	Integrin alpha-L	P20701	0	1	0	1
1454	ITGAM	Integrin alpha-M	P11215	0	1	1	1
1455	ITGAV	Integrin alpha-V	P06756	0	1	1	1
1456	ITGAX	Integrin alpha-X	P20702	0	1	0	1
1457	ITGB1	Integrin beta-1	P05556	1	1	1	1
1458	ITGB1BP1	Integrin beta-1-binding protein 1	O14713	0	0	0	1
1459	ITGB1BP2	Integrin beta-1-binding protein 2	Q9UKP3	1	0	0	1
1460	ITGB2	Integrin beta-2	P05107	0	1	0	1
1461	ITGB5	Integrin beta-5	P18084	1	1	0	1
1462	ITGB6	Integrin beta-6	P18564	0	0	1	1
1463	ITGB7	Integrin beta-7	P26010	0	0	0	1
1464	ITGBL1	Integrin beta-like protein 1	O95965	1	0	0	1
1465	ITIH1	Inter-alpha-trypsin inhibitor heavy chain H1	P19827	1	0	0	1
1466	ITIH3	Inter-alpha-trypsin inhibitor heavy chain H3	Q06033	1	0	0	1
1467	ITIH4	Inter-alpha-trypsin inhibitor heavy chain H4	Q14624	1	1	1	1
1468	ITIH5	Inter-alpha-trypsin inhibitor heavy chain H5	Q86UX2	1	0	0	1
1469	ITM2A	Integral membrane protein 2A	O43736	0	0	1	1
1470	ITPA	Inosine triphosphate pyrophosphatase	Q9BY32	0	0	0	1
1471	ITPR1	Inositol 1,4,5-trisphosphate receptor type 1	Q14643	1	1	0	1
1472	ITPRIP	Inositol 1,4,5-trisphosphate receptor-interacting protein	Q8IWB1	0	0	0	1
1473	IVD	Isovaleryl-CoA dehydrogenase, mitochondrial	P26440	0	0	0	1
1474	IZUMO1	Izumo sperm-egg fusion protein 1	Q8IYV9	0	0	0	1
1475	JAM2	Junctional adhesion molecule B	P57087	0	0	0	1
1476	JAM3	Junctional adhesion molecule C	Q9BX67	1	1	0	1
1477	JCHAIN	Immunoglobulin J chain	P01591	0	0	0	1
1478	JMJD1C	Probable JmjC domain-containing histone demethylation protein 2C	Q15652	0	0	0	1
1479	JPT2	Jupiter microtubule associated homolog 2	Q9H910	0	0	0	1
1480	JUN	Transcription factor AP-1	P05412	0	1	0	1
1481	KAZALD1	Kazal-type serine protease inhibitor domain-containing protein 1	Q96I82	1	0	0	1
1482	KAZN	Kazrin	Q674X7	0	0	1	1
1483	KCNC4	Potassium voltage-gated channel subfamily C member 4	Q03721	0	0	0	1
1484	KCNH2	Potassium voltage-gated channel subfamily H member 2	Q12809	0	0	0	1
1485	KCNIP4	Kv channel-interacting protein 4	Q6PIL6	0	0	0	1
1486	KCTD5	BTB/POZ domain-containing protein KCTD5	Q9NXV2	0	0	0	1
1487	KDM3A	Lysine-specific demethylase 3A	Q9Y4C1	0	0	0	1
1488	KDR	Vascular endothelial growth factor receptor 2	P35968	0	1	0	1
1489	KEL	Kell blood group glycoprotein	P23276	0	0	0	1
1490	KHDC3L	KH domain-containing protein 3	Q587J8	0	0	0	1
1491	KHK	Ketohexokinase	P50053	0	0	0	1
1492	KIAA0319	Dyslexia-associated protein KIAA0319	Q5VV43	0	0	1	1
1493	KIAA1549	UPF0606 protein KIAA1549	Q9HCM3	0	0	0	1
1494	KIAA1549L	UPF0606 protein KIAA1549L	Q6ZVL6	0	0	0	1
1495	KIAA2013	Uncharacterized protein KIAA2013	Q8IYS2	0	0	0	1
1496	KIF1C	Kinesin-like protein KIF1C	O43896	0	0	0	1
1497	KIF20B	Kinesin-like protein KIF20B	Q96Q89	0	0	0	1
1498	KIF22	Kinesin-like protein KIF22	Q14807	0	0	0	1
1499	KIFBP	KIF-binding protein	Q96EK5	0	0	0	1
1500	KIR2DL2	Killer cell immunoglobulin-like receptor 2DL2	P43627	0	0	0	1
1501	KIR2DL3	Killer cell immunoglobulin-like receptor 2DL3	P43628	0	0	0	1
1502	KIR2DS4	Killer cell immunoglobulin-like receptor 2DS4	P43632	0	0	0	1
1503	KIR3DL1	Killer cell immunoglobulin-like receptor 3DL1	P43629	0	0	0	1
1504	KIR3DL2	Killer cell immunoglobulin-like receptor 3DL2	P43630	0	0	0	1
1505	KIRREL1	Kin of IRRE-like protein 1	Q96J84	0	0	0	1
1506	KIRREL2	Kin of IRRE-like protein 2	Q6UWL6	0	0	0	1
1507	KIT	Mast/stem cell growth factor receptor Kit	P10721	0	1	1	1
1508	KITLG	Kit ligand	P21583	0	0	0	1
1509	KLB	Beta-klotho	Q86Z14	0	0	0	1
1510	KLF4	Krueppel-like factor 4	O43474	0	1	0	1
1511	KLHL41	Kelch-like protein 41	O60662	0	0	0	1
1512	KLK1	Kallikrein-1	P06870	0	0	0	1
1513	KLK10	Kallikrein-10	O43240	0	0	0	1
1514	KLK11	Kallikrein-11	Q9UBX7	0	0	1	1
1515	KLK12	Kallikrein-12	Q9UKR0	0	0	0	1
1516	KLK13	Kallikrein-13	Q9UKR3	0	0	0	1
1517	KLK14	Kallikrein-14	Q9P0G3	0	0	0	1
1518	KLK15	Kallikrein-15	Q9H2R5	0	0	0	1
1519	KLK3	Prostate-specific antigen	P07288	0	0	0	1
1520	KLK4	Kallikrein-4	Q9Y5K2	0	0	1	1
1521	KLK6	Kallikrein-6	Q92876	0	0	0	1
1522	KLK7	Kallikrein-7	P49862	0	0	1	1
1523	KLK8	Kallikrein-8	O60259	0	0	0	1
1524	KLKB1	Plasma kallikrein	P03952	0	0	0	1
1525	KLRB1	Killer cell lectin-like receptor subfamily B member 1	Q12918	0	0	0	1
1526	KLRC1	NKG2-A/NKG2-B type II integral membrane protein	P26715	0	0	0	1
1527	KLRD1	Natural killer cells antigen CD94	Q13241	0	1	0	1
1528	KLRF1	Killer cell lectin-like receptor subfamily F member 1	Q9NZS2	0	0	0	1
1529	KLRK1	NKG2-D type II integral membrane protein	P26718	0	1	0	1
1530	KRT14	Keratin, type I cytoskeletal 14	P02533	0	0	0	1
1531	KRT17	Keratin, type I cytoskeletal 17	Q04695	1	0	0	1
1532	KRT18	Keratin, type I cytoskeletal 18	P05783	0	0	0	1
1533	KRT19	Keratin, type I cytoskeletal 19	P08727	0	0	0	1
1534	KRT5	Keratin, type II cytoskeletal 5	P13647	0	1	0	1
1535	KRT6C	Keratin, type II cytoskeletal 6C	P48668	0	0	0	1
1536	KRT8	Keratin, type II cytoskeletal 8	P05787	0	0	0	1
1537	KYAT1	Kynurenine--oxoglutarate transaminase 1	Q16773	0	0	0	1
1538	KYNU	Kynureninase	Q16719	0	0	0	1
1539	L1CAM	Neural cell adhesion molecule L1	P32004	0	0	1	1
1540	L3HYPDH	Trans-3-hydroxy-L-proline dehydratase	Q96EM0	0	0	0	1
1541	LACRT	Extracellular glycoprotein lacritin	Q9GZZ8	0	0	0	1
1542	LACTB2	Endoribonuclease LACTB2	Q53H82	0	0	0	1
1543	LAG3	Lymphocyte activation gene 3 protein	P18627	0	0	0	1
1544	LAIR1	Leukocyte-associated immunoglobulin-like receptor 1	Q6GTX8	0	0	0	1
1545	LAIR2	Leukocyte-associated immunoglobulin-like receptor 2	Q6ISS4	0	0	0	1
1546	LAMA1	Laminin subunit alpha-1	P25391	0	0	0	1
1547	LAMA4	Laminin subunit alpha-4	Q16363	0	0	0	1
1548	LAMB1	Laminin subunit beta-1	P07942	0	0	0	1
1549	LAMP1	Lysosome-associated membrane glycoprotein 1	P11279	0	0	1	1
1550	LAMP2	Lysosome-associated membrane glycoprotein 2	P13473	0	0	0	1
1551	LAMP3	Lysosome-associated membrane glycoprotein 3	Q9UQV4	0	0	0	1
1552	LAMTOR5	Ragulator complex protein LAMTOR5	O43504	0	0	0	1
1553	LAP3	Cytosol aminopeptidase	P28838	0	0	0	1
1554	LARP1	La-related protein 1	Q6PKG0	0	0	1	1
1555	LAT	Linker for activation of T-cells family member 1	O43561	1	1	0	1
1556	LAT2	Linker for activation of T-cells family member 2	Q9GZY6	0	0	0	1
1557	LATS1	Serine/threonine-protein kinase LATS1	O95835	0	0	0	1
1558	LAYN	Layilin	Q6UX15	0	0	0	1
1559	LBP	Lipopolysaccharide-binding protein	P18428	1	1	0	1
1560	LBR	Delta(14)-sterol reductase LBR	Q14739	0	0	1	1
1561	LCAT	Phosphatidylcholine-sterol acyltransferase	P04180	0	1	1	1
1562	LCN15	Lipocalin-15	Q6UWW0	0	0	0	1
1563	LCN2	Neutrophil gelatinase-associated lipocalin	P80188	0	1	0	1
1564	LCP1	Plastin-2	P13796	0	0	0	1
1565	LDLR	Low-density lipoprotein receptor	P01130	0	1	0	1
1566	LDLRAP1	Low density lipoprotein receptor adapter protein 1	Q5SW96	0	1	0	1
1567	LECT2	Leukocyte cell-derived chemotaxin-2	O14960	0	0	0	1
1568	LEFTY2	Left-right determination factor 2	O00292	1	0	1	1
1569	LEG1	Protein LEG1 homolog	Q6P5S2	0	0	0	1
1570	LELP1	Late cornified envelope-like proline-rich protein 1	Q5T871	0	0	0	1
1571	LEO1	RNA polymerase-associated protein LEO1	Q8WVC0	0	0	0	1
1572	LEP	Leptin	P41159	1	1	0	1
1573	LEPR	Leptin receptor	P48357	0	1	1	1
1574	LETM1	Mitochondrial proton/calcium exchanger protein	O95202	0	0	0	1
1575	LGALS1	Galectin-1	P09382	0	0	0	1
1576	LGALS3	Galectin-3	P17931	0	1	0	1
1577	LGALS3BP	Galectin-3-binding protein	Q08380	0	0	0	1
1578	LGALS4	Galectin-4	P56470	0	0	0	1
1579	LGALS7_LGALS7B	Galectin-7	P47929	0	0	0	1
1580	LGALS8	Galectin-8	O00214	0	0	0	1
1581	LGALS9	Galectin-9	O00182	0	0	1	1
1582	LGMN	Legumain	Q99538	0	1	0	1
1583	LHB	Lutropin subunit beta	P01229	0	0	0	1
1584	LHPP	Phospholysine phosphohistidine inorganic pyrophosphate phosphatase	Q9H008	0	0	0	1
1585	LIF	Leukemia inhibitory factor	P15018	0	0	0	1
1586	LIFR	Leukemia inhibitory factor receptor	P42702	0	0	0	1
1587	LILRA2	Leukocyte immunoglobulin-like receptor subfamily A member 2	Q8N149	0	0	0	1
1588	LILRA3	Leukocyte immunoglobulin-like receptor subfamily A member 3	Q8N6C8	0	0	0	1
1589	LILRA4	Leukocyte immunoglobulin-like receptor subfamily A member 4	P59901	0	0	0	1
1590	LILRA5	Leukocyte immunoglobulin-like receptor subfamily A member 5	A6NI73	0	0	0	1
1591	LILRA6	Leukocyte immunoglobulin-like receptor subfamily A member 6	Q6PI73	0	0	0	1
1592	LILRB1	Leukocyte immunoglobulin-like receptor subfamily B member 1	Q8NHL6	0	0	0	1
1593	LILRB2	Leukocyte immunoglobulin-like receptor subfamily B member 2	Q8N423	0	0	0	1
1594	LILRB4	Leukocyte immunoglobulin-like receptor subfamily B member 4	Q8NHJ6	0	0	1	1
1595	LILRB5	Leukocyte immunoglobulin-like receptor subfamily B member 5	O75023	0	0	0	1
1596	LIPF	Gastric triacylglycerol lipase	P07098	0	0	0	1
1597	LMNB1	Lamin-B1	P20700	0	1	0	1
1598	LMNB2	Lamin-B2	Q03252	0	0	0	1
1599	LMOD1	Leiomodin-1	P29536	1	0	1	1
1600	LMOD2	Leiomodin-2	Q6P5Q4	0	0	0	1
1601	LONP1	Lon protease homolog, mitochondrial	P36776	0	0	0	1
1602	LPA	Apolipoprotein(a)	P08519	0	1	1	1
1603	LPCAT2	Lysophosphatidylcholine acyltransferase 2	Q7L5N7	0	0	0	1
1604	LPL	Lipoprotein lipase	P06858	0	1	1	1
1605	LPO	Lactoperoxidase	P22079	0	0	0	1
1606	LPP	Lipoma-preferred partner	Q93052	1	1	0	1
1607	LRCH4	Leucine-rich repeat and calponin homology domain-containing protein 4	O75427	0	0	0	1
1608	LRFN2	Leucine-rich repeat and fibronectin type-III domain-containing protein 2	Q9ULH4	0	0	1	1
1609	LRG1	Leucine-rich alpha-2-glycoprotein	P02750	0	0	1	1
1610	LRIG1	Leucine-rich repeats and immunoglobulin-like domains protein 1	Q96JA1	0	0	0	1
1611	LRIG3	Leucine-rich repeats and immunoglobulin-like domains protein 3	Q6UXM1	0	0	0	1
1612	LRP1	Prolow-density lipoprotein receptor-related protein 1	Q07954	0	1	0	1
1613	LRP11	Low-density lipoprotein receptor-related protein 11	Q86VZ4	0	0	0	1
1614	LRP2	Low-density lipoprotein receptor-related protein 2	P98164	0	1	0	1
1615	LRP2BP	LRP2-binding protein	Q9P2M1	0	0	0	1
1616	LRPAP1	Alpha-2-macroglobulin receptor-associated protein	P30533	0	0	0	1
1617	LRRC25	Leucine-rich repeat-containing protein 25	Q8N386	0	0	0	1
1618	LRRC37A2	Leucine-rich repeat-containing protein 37A2	A6NM11	0	0	0	1
1619	LRRC38	Leucine-rich repeat-containing protein 38	Q5VT99	0	0	0	1
1620	LRRC59	Leucine-rich repeat-containing protein 59	Q96AG4	0	0	0	1
1621	LRRFIP1	Leucine-rich repeat flightless-interacting protein 1	Q32MZ4	0	0	0	1
1622	LRRN1	Leucine-rich repeat neuronal protein 1	Q6UXK5	0	0	1	1
1623	LRTM1	Leucine-rich repeat and transmembrane domain-containing protein 1	Q9HBL6	0	1	1	1
1624	LRTM2	Leucine-rich repeat and transmembrane domain-containing protein 2	Q8N967	0	0	0	1
1625	LSM1	U6 snRNA-associated Sm-like protein LSm1	O15116	0	0	0	1
1626	LSM8	U6 snRNA-associated Sm-like protein LSm8	O95777	0	0	0	1
1627	LSP1	Lymphocyte-specific protein 1	P33241	0	0	0	1
1628	LTA	Lymphotoxin-alpha	P01374	0	1	0	1
1629	LTA4H	Leukotriene A-4 hydrolase	P09960	0	1	0	1
1630	LTB	Lymphotoxin-beta	Q06643	0	1	1	1
1631	LTBP2	Latent-transforming growth factor beta-binding protein 2	Q14767	1	0	1	1
1632	LTBP3	Latent-transforming growth factor beta-binding protein 3	Q9NS15	0	0	0	1
1633	LTBR	Tumor necrosis factor receptor superfamily member 3	P36941	0	1	0	1
1634	LTO1	Protein LTO1 homolog	Q8WV07	0	0	0	1
1635	LUZP2	Leucine zipper protein 2	Q86TE4	1	0	0	1
1636	LXN	Latexin	Q9BS40	0	0	0	1
1637	LY6D	Lymphocyte antigen 6D	Q14210	0	0	0	1
1638	LY75	Lymphocyte antigen 75	O60449	0	1	0	1
1639	LY9	T-lymphocyte surface antigen Ly-9	Q9HBG7	0	0	0	1
1640	LY96	Lymphocyte antigen 96	Q9Y6Y9	0	1	0	1
1641	LYAR	Cell growth-regulating nucleolar protein	Q9NX58	0	0	0	1
1642	LYN	Tyrosine-protein kinase Lyn	P07948	0	1	0	1
1643	LYPD1	Ly6/PLAUR domain-containing protein 1	Q8N2G4	0	0	0	1
1644	LYPD3	Ly6/PLAUR domain-containing protein 3	O95274	0	0	1	1
1645	LYPD8	Ly6/PLAUR domain-containing protein 8	Q6UX82	0	0	0	1
1646	LYPLA2	Acyl-protein thioesterase 2	O95372	0	0	0	1
1647	LYSMD3	LysM and putative peptidoglycan-binding domain-containing protein 3	Q7Z3D4	0	0	0	1
1648	LYVE1	Lymphatic vessel endothelial hyaluronic acid receptor 1	Q9Y5Y7	0	0	1	1
1649	LYZL2	Lysozyme-like protein 2	Q7Z4W2	0	0	0	1
1650	LZTFL1	Leucine zipper transcription factor-like protein 1	Q9NQ48	0	0	0	1
1651	M6PR	Cation-dependent mannose-6-phosphate receptor	P20645	0	0	0	1
1652	MAD1L1	Mitotic spindle assembly checkpoint protein MAD1	Q9Y6D9	0	1	1	1
1653	MAEA	E3 ubiquitin-protein transferase MAEA	Q7L5Y9	0	0	0	1
1654	MAG	Myelin-associated glycoprotein	P20916	0	0	0	1
1655	MAGEA3	Melanoma-associated antigen 3	P43357	0	0	0	1
1656	MAGED1	Melanoma-associated antigen D1	Q9Y5V3	0	0	0	1
1657	MAMDC2	MAM domain-containing protein 2	Q7Z304	1	0	0	1
1658	MAMDC4	Apical endosomal glycoprotein	Q6UXC1	0	0	1	1
1659	MAN1A2	Mannosyl-oligosaccharide 1,2-alpha-mannosidase IB	O60476	0	0	0	1
1660	MAN2B2	Epididymis-specific alpha-mannosidase	Q9Y2E5	0	0	0	1
1661	MANEAL	Glycoprotein endo-alpha-1,2-mannosidase-like protein	Q5VSG8	0	0	0	1
1662	MANF	Mesencephalic astrocyte-derived neurotrophic factor	P55145	0	0	0	1
1663	MANSC1	MANSC domain-containing protein 1	Q9H8J5	0	0	1	1
1664	MANSC4	MANSC domain-containing protein 4	A6NHS7	0	0	0	1
1665	MAP1LC3A	Microtubule-associated proteins 1A/1B light chain 3A	Q9H492	0	0	0	1
1666	MAP1LC3B2	Microtubule-associated proteins 1A/1B light chain 3 beta 2	A6NCE7	0	0	0	1
1667	MAP2	Microtubule-associated protein 2	P11137	0	0	0	1
1668	MAP2K1	Dual specificity mitogen-activated protein kinase kinase 1	Q02750	0	1	0	1
1669	MAP2K6	Dual specificity mitogen-activated protein kinase kinase 6	P52564	0	1	0	1
1670	MAP3K5	Mitogen-activated protein kinase kinase kinase 5	Q99683	0	1	0	1
1671	MAP4K5	Mitogen-activated protein kinase kinase kinase kinase 5	Q9Y4K4	0	0	0	1
1672	MAPK13	Mitogen-activated protein kinase 13	O15264	0	1	0	1
1673	MAPK9	Mitogen-activated protein kinase 9	P45984	0	1	0	1
1674	MAPKAPK2	MAP kinase-activated protein kinase 2	P49137	0	0	0	1
1675	MAPRE3	Microtubule-associated protein RP/EB family member 3	Q9UPY8	0	0	0	1
1676	MAPT	Microtubule-associated protein tau	P10636	0	0	0	1
1677	MARCO	Macrophage receptor MARCO	Q9UEW3	0	1	0	1
1678	MARS1	Methionine--tRNA ligase, cytoplasmic	P56192	0	0	0	1
1679	MASP1	Mannan-binding lectin serine protease 1	P48740	0	0	1	1
1680	MATN2	Matrilin-2	O00339	0	0	0	1
1681	MATN3	Matrilin-3	O15232	0	0	1	1
1682	MAVS	Mitochondrial antiviral-signaling protein	Q7Z434	0	0	0	1
1683	MAX	Protein max	P61244	0	0	0	1
1684	MB	Myoglobin	P02144	0	0	0	1
1685	MBL2	Mannose-binding protein C	P11226	0	1	0	1
1686	MCAM	Cell surface glycoprotein MUC18	P43121	1	0	1	1
1687	MCEE	Methylmalonyl-CoA epimerase, mitochondrial	Q96PE7	0	0	0	1
1688	MCEMP1	Mast cell-expressed membrane protein 1	Q8IX19	0	0	0	1
1689	MCFD2	Multiple coagulation factor deficiency protein 2	Q8NI22	0	0	0	1
1690	MCTS1	Malignant T-cell-amplified sequence 1	Q9ULC4	0	0	0	1
1691	MDGA1	MAM domain-containing glycosylphosphatidylinositol anchor protein 1	Q8NFP4	0	0	1	1
1692	MDH1	Malate dehydrogenase, cytoplasmic	P40925	0	0	0	1
1693	MDK	Midkine	P21741	0	0	0	1
1694	MDM1	Nuclear protein MDM1	Q8TC05	0	0	0	1
1695	MECR	Enoyl-[acyl-carrier-protein] reductase, mitochondrial	Q9BV79	0	0	0	1
1696	MED18	Mediator of RNA polymerase II transcription subunit 18	Q9BUE0	0	0	0	1
1697	MED21	Mediator of RNA polymerase II transcription subunit 21	Q13503	0	0	0	1
1698	MEGF10	Multiple epidermal growth factor-like domains protein 10	Q96KG7	0	0	1	1
1699	MEGF11	Multiple epidermal growth factor-like domains protein 11	A6BM72	0	0	0	1
1700	MEGF9	Multiple epidermal growth factor-like domains protein 9	Q9H1U4	0	1	0	1
1701	MELTF	Melanotransferrin	P08582	0	0	0	1
1702	MENT	Protein MENT	Q9BUN1	0	0	1	1
1703	MEP1A	Meprin A subunit alpha	Q16819	0	0	0	1
1704	MEP1B	Meprin A subunit beta	Q16820	0	0	1	1
1705	MEPE	Matrix extracellular phosphoglycoprotein	Q9NQ76	0	0	0	1
1706	MERTK	Tyrosine-protein kinase Mer	Q12866	0	1	0	1
1707	MESD	LRP chaperone MESD	Q14696	0	0	0	1
1708	MET	Hepatocyte growth factor receptor	P08581	0	0	1	1
1709	METAP1	Methionine aminopeptidase 1	P53582	0	0	0	1
1710	METAP1D	Methionine aminopeptidase 1D, mitochondrial	Q6UB28	0	0	0	1
1711	METAP2	Methionine aminopeptidase 2	P50579	0	0	0	1
1712	MFAP3	Microfibril-associated glycoprotein 3	P55082	0	0	0	1
1713	MFAP3L	Microfibrillar-associated protein 3-like	O75121	0	0	0	1
1714	MFAP4	Microfibril-associated glycoprotein 4	P55083	1	0	1	1
1715	MFAP5	Microfibrillar-associated protein 5	Q13361	1	0	0	1
1716	MFGE8	Lactadherin	Q08431	1	1	0	1
1717	MGLL	Monoglyceride lipase	Q99685	0	0	0	1
1718	MGMT	Methylated-DNA--protein-cysteine methyltransferase	P16455	0	0	0	1
1719	MIA	Melanoma-derived growth regulatory protein	Q16674	0	0	0	1
1720	MICALL2	MICAL-like protein 2	Q8IY33	0	0	0	1
1721	MICB_MICA	MHC class I polypeptide-related sequence A_MHC class I polypeptide-related sequence B	Q29980_Q29983	0	0	0	1
1722	MIF	Macrophage migration inhibitory factor	P14174	0	1	0	1
1723	MILR1	Allergin-1	Q7Z6M3	0	0	0	1
1724	MINDY1	Ubiquitin carboxyl-terminal hydrolase MINDY-1	Q8N5J2	0	0	0	1
1725	MINK1	Misshapen-like kinase 1	Q8N4C8	0	0	0	1
1726	MITD1	MIT domain-containing protein 1	Q8WV92	0	0	0	1
1727	MKI67	Proliferation marker protein Ki-67	P46013	0	1	0	1
1728	MLLT1	Protein ENL	Q03111	0	0	0	1
1729	MLN	Promotilin	P12872	0	0	0	1
1730	MME	Neprilysin	P08473	0	0	0	1
1731	MMP1	Interstitial collagenase	P03956	0	1	0	1
1732	MMP10	Stromelysin-2	P09238	0	0	0	1
1733	MMP12	Macrophage metalloelastase	P39900	0	1	1	1
1734	MMP13	Collagenase 3	P45452	0	1	0	1
1735	MMP15	Matrix metalloproteinase-15	P51511	0	0	0	1
1736	MMP3	Stromelysin-1	P08254	0	1	0	1
1737	MMP7	Matrilysin	P09237	0	1	1	1
1738	MMP8	Neutrophil collagenase	P22894	0	1	0	1
1739	MMP9	Matrix metalloproteinase-9	P14780	0	1	0	1
1740	MMUT	Methylmalonyl-CoA mutase, mitochondrial	P22033	0	0	0	1
1741	MN1	Transcriptional activator MN1	Q10571	1	1	0	1
1742	MNAT1	CDK-activating kinase assembly factor MAT1	P51948	0	0	0	1
1743	MNDA	Myeloid cell nuclear differentiation antigen	P41218	0	1	0	1
1744	MOCS2	Molybdopterin synthase catalytic subunit	O96007	0	0	0	1
1745	MOG	Myelin-oligodendrocyte glycoprotein	Q16653	0	0	0	1
1746	MORC3	MORC family CW-type zinc finger protein 3	Q14149	0	0	0	1
1747	MORF4L1	Mortality factor 4-like protein 1	Q9UBU8	0	0	0	1
1748	MORF4L2	Mortality factor 4-like protein 2	Q15014	0	0	0	1
1749	MORN4	MORN repeat-containing protein 4	Q8NDC4	0	0	0	1
1750	MPHOSPH8	M-phase phosphoprotein 8	Q99549	0	0	0	1
1751	MPI	Mannose-6-phosphate isomerase	P34949	0	0	0	1
1752	MPIG6B	Megakaryocyte and platelet inhibitory receptor G6b	O95866	0	0	0	1
1753	MPO	Myeloperoxidase	P05164	0	1	0	1
1754	MPRIP	Myosin phosphatase Rho-interacting protein	Q6WCQ1	0	1	0	1
1755	MRC1	Macrophage mannose receptor 1	P22897	0	0	1	1
1756	MRI1	Methylthioribose-1-phosphate isomerase	Q9BV20	0	0	0	1
1757	MRPL24	39S ribosomal protein L24, mitochondrial	Q96A35	0	0	0	1
1758	MRPL28	39S ribosomal protein L28, mitochondrial	Q13084	0	0	0	1
1759	MRPL46	39S ribosomal protein L46, mitochondrial	Q9H2W6	0	0	0	1
1760	MRPL52	39S ribosomal protein L52, mitochondrial	Q86TS9	0	0	0	1
1761	MRPL58	Peptidyl-tRNA hydrolase ICT1, mitochondrial	Q14197	0	0	0	1
1762	MRPS16	28S ribosomal protein S16, mitochondrial	Q9Y3D3	0	0	0	1
1763	MSLN	Mesothelin	Q13421	0	0	0	1
1764	MSLNL	Mesothelin-like protein	Q96KJ4	0	0	0	1
1765	MSMB	Beta-microseminoprotein	P08118	0	0	0	1
1766	MSR1	Macrophage scavenger receptor types I and II	P21757	1	1	0	1
1767	MSRA	Mitochondrial peptide methionine sulfoxide reductase	Q9UJ68	0	1	0	1
1768	MST1	Hepatocyte growth factor-like protein	P26927	0	0	0	1
1769	MSTN	Growth/differentiation factor 8	O14793	0	1	0	1
1770	MTDH	Protein LYRIC	Q86UE4	0	0	0	1
1771	MTHFD2	Bifunctional methylenetetrahydrofolate dehydrogenase/cyclohydrolase, mitochondrial	P13995	1	0	0	1
1772	MTHFSD	Methenyltetrahydrofolate synthase domain-containing protein	Q2M296	0	0	1	1
1773	MTIF3	Translation initiation factor IF-3, mitochondrial	Q9H2K0	0	0	0	1
1774	MTPN	Myotrophin	P58546	0	1	0	1
1775	MTR	Methionine synthase	Q99707	0	1	0	1
1776	MTSS1	Protein MTSS 1	O43312	0	1	1	1
1777	MTSS2	Protein MTSS 2	Q765P7	0	0	0	1
1778	MTUS1	Microtubule-associated tumor suppressor 1	Q9ULD2	0	0	0	1
1779	MUC13	Mucin-13	Q9H3R2	0	0	0	1
1780	MUC16	Mucin-16	Q8WXI7	0	0	0	1
1781	MUC2	Mucin-2	Q02817	0	0	0	1
1782	MUCL3	Mucin-like protein 3	Q3MIW9	0	0	0	1
1783	MVK	Mevalonate kinase	Q03426	0	1	1	1
1784	MXRA8	Matrix remodeling-associated protein 8	Q9BRK3	0	0	1	1
1785	MYBPC1	Myosin-binding protein C, slow-type	Q00872	0	0	0	1
1786	MYBPC2	Myosin-binding protein C, fast-type	Q14324	0	0	0	1
1787	MYCBP2	E3 ubiquitin-protein ligase MYCBP2	O75592	0	0	0	1
1788	MYDGF	Myeloid-derived growth factor	Q969H8	0	1	0	1
1789	MYH4	Myosin-4	Q9Y623	0	0	0	1
1790	MYH7B	Myosin-7B	A7E2Y1	0	0	0	1
1791	MYH9	Myosin-9	P35579	1	1	0	1
1792	MYL1	Myosin light chain 1/3, skeletal muscle isoform	P05976	0	0	0	1
1793	MYL3	Myosin light chain 3	P08590	0	0	0	1
1794	MYL4	Myosin light chain 4	P12829	0	0	0	1
1795	MYL6B	Myosin light chain 6B	P14649	0	0	0	1
1796	MYLPF	Myosin regulatory light chain 2, skeletal muscle isoform	Q96A32	0	0	0	1
1797	MYO6	Unconventional myosin-VI	Q9UM54	0	0	0	1
1798	MYO9B	Unconventional myosin-IXb	Q13459	0	0	0	1
1799	MYOC	Myocilin	Q99972	1	0	0	1
1800	MYOM1	Myomesin-1	P52179	1	0	0	1
1801	MYOM2	Myomesin-2	P54296	0	1	0	1
1802	MYOM3	Myomesin-3	Q5VTT5	0	0	0	1
1803	MZB1	Marginal zone B- and B1-cell-specific protein	Q8WU39	0	0	0	1
1804	MZT1	Mitotic-spindle organizing protein 1	Q08AG7	0	0	0	1
1805	NAA10	N-alpha-acetyltransferase 10	P41227	0	0	0	1
1806	NAA80	N-alpha-acetyltransferase 80	Q93015	0	0	0	1
1807	NAAA	N-acylethanolamine-hydrolyzing acid amidase	Q02083	0	0	0	1
1808	NACC1	Nucleus accumbens-associated protein 1	Q96RE7	0	0	0	1
1809	NADK	NAD kinase	O95544	0	0	0	1
1810	NAGA	Alpha-N-acetylgalactosaminidase	P17050	0	0	0	1
1811	NAGK	N-acetyl-D-glucosamine kinase	Q9UJ70	0	0	0	1
1812	NAGPA	N-acetylglucosamine-1-phosphodiester alpha-N-acetylglucosaminidase	Q9UK23	0	0	0	1
1813	NAMPT	Nicotinamide phosphoribosyltransferase	P43490	0	1	0	1
1814	NAP1L4	Nucleosome assembly protein 1-like 4	Q99733	0	0	0	1
1815	NAPRT	Nicotinate phosphoribosyltransferase	Q6XQN6	0	0	0	1
1816	NARS1	Asparagine--tRNA ligase, cytoplasmic	O43776	0	0	0	1
1817	NBL1	Neuroblastoma suppressor of tumorigenicity 1	P41271	0	0	0	1
1818	NBN	Nibrin	O60934	0	0	0	1
1819	NCAM1	Neural cell adhesion molecule 1	P13591	0	0	0	1
1820	NCAM2	Neural cell adhesion molecule 2	O15394	0	0	1	1
1821	NCAN	Neurocan core protein	O14594	0	0	0	1
1822	NCF2	Neutrophil cytosol factor 2	P19878	0	1	0	1
1823	NCK2	Cytoplasmic protein NCK2	O43639	0	0	0	1
1824	NCLN	Nicalin	Q969V3	0	0	0	1
1825	NCR1	Natural cytotoxicity triggering receptor 1	O76036	0	0	0	1
1826	NCR3LG1	Natural cytotoxicity triggering receptor 3 ligand 1	Q68D85	0	0	1	1
1827	NCS1	Neuronal calcium sensor 1	P62166	0	0	0	1
1828	NDRG1	Protein NDRG1	Q92597	0	0	0	1
1829	NDST1	Bifunctional heparan sulfate N-deacetylase/N-sulfotransferase 1	P52848	0	0	0	1
1830	NDUFA5	NADH dehydrogenase [ubiquinone] 1 alpha subcomplex subunit 5	Q16718	0	0	0	1
1831	NDUFB7	NADH dehydrogenase [ubiquinone] 1 beta subcomplex subunit 7	P17568	0	0	0	1
1832	NDUFS6	NADH dehydrogenase [ubiquinone] iron-sulfur protein 6, mitochondrial	O75380	0	0	0	1
1833	NEB	Nebulin	P20929	0	0	0	1
1834	NECAP2	Adaptin ear-binding coat-associated protein 2	Q9NVZ3	0	0	0	1
1835	NECTIN1	Nectin-1	Q15223	0	0	1	1
1836	NECTIN2	Nectin-2	Q92692	0	1	0	1
1837	NECTIN4	Nectin-4	Q96NY8	0	0	0	1
1838	NEDD4L	E3 ubiquitin-protein ligase NEDD4-like	Q96PU5	0	0	0	1
1839	NEDD9	Enhancer of filamentation 1	Q14511	0	0	0	1
1840	NEFL	Neurofilament light polypeptide	P07196	0	0	0	1
1841	NEK7	Serine/threonine-protein kinase Nek7	Q8TDX7	0	0	0	1
1842	NELL1	Protein kinase C-binding protein NELL1	Q92832	0	0	1	1
1843	NELL2	Protein kinase C-binding protein NELL2	Q99435	0	0	1	1
1844	NENF	Neudesin	Q9UMX5	0	0	0	1
1845	NEO1	Neogenin	Q92859	0	0	1	1
1846	NEXN	Nexilin	Q0ZGT2	1	0	0	1
1847	NFASC	Neurofascin	O94856	0	0	0	1
1848	NFAT5	Nuclear factor of activated T-cells 5	O94916	0	1	0	1
1849	NFATC1	Nuclear factor of activated T-cells, cytoplasmic 1	O95644	0	1	0	1
1850	NFATC3	Nuclear factor of activated T-cells, cytoplasmic 3	Q12968	0	1	0	1
1851	NFE2	Transcription factor NF-E2 45 kDa subunit	Q16621	0	1	1	1
1852	NFIC	Nuclear factor 1 C-type	P08651	0	0	0	1
1853	NFKB1	Nuclear factor NF-kappa-B p105 subunit	P19838	0	1	1	1
1854	NFKB2	Nuclear factor NF-kappa-B p100 subunit	Q00653	0	1	0	1
1855	NFKBIE	NF-kappa-B inhibitor epsilon	O00221	0	0	0	1
1856	NFU1	NFU1 iron-sulfur cluster scaffold homolog, mitochondrial	Q9UMS0	0	0	0	1
1857	NFX1	Transcriptional repressor NF-X1	Q12986	0	0	0	1
1858	NFYA	Nuclear transcription factor Y subunit alpha	P23511	0	0	1	1
1859	NGF	Beta-nerve growth factor	P01138	1	0	0	1
1860	NGFR	Tumor necrosis factor receptor superfamily member 16	P08138	0	0	0	1
1861	NGRN	Neugrin	Q9NPE2	0	0	0	1
1862	NHLRC3	NHL repeat-containing protein 3	Q5JS37	0	0	0	1
1863	NID1	Nidogen-1	P14543	0	0	0	1
1864	NID2	Nidogen-2	Q14112	0	0	0	1
1865	NINJ1	Ninjurin-1	Q92982	0	0	0	1
1866	NIT1	Deaminated glutathione amidase	Q86X76	0	0	1	1
1867	NIT2	Omega-amidase NIT2	Q9NQR4	0	0	0	1
1868	NLGN1	Neuroligin-1	Q8N2Q7	1	1	0	1
1869	NLGN2	Neuroligin-2	Q8NFZ4	0	0	0	1
1870	NME1	Nucleoside diphosphate kinase A	P15531	0	0	0	1
1871	NME3	Nucleoside diphosphate kinase 3	Q13232	0	0	0	1
1872	NMI	N-myc-interactor	Q13287	0	0	0	1
1873	NMNAT1	Nicotinamide/nicotinic acid mononucleotide adenylyltransferase 1	Q9HAN9	0	0	0	1
1874	NMRK2	Nicotinamide riboside kinase 2	Q9NPI5	0	0	0	1
1875	NMT1	Glycylpeptide N-tetradecanoyltransferase 1	P30419	0	0	0	1
1876	NOMO1	Nodal modulator 1	Q15155	0	0	0	1
1877	NOP56	Nucleolar protein 56	O00567	0	0	0	1
1878	NOS1	Nitric oxide synthase, brain	P29475	0	1	0	1
1879	NOS2	Nitric oxide synthase, inducible	P35228	0	1	0	1
1880	NOS3	Nitric oxide synthase, endothelial	P29474	0	1	1	1
1881	NOTCH1	Neurogenic locus notch homolog protein 1	P46531	0	1	1	1
1882	NOTCH2	Neurogenic locus notch homolog protein 2	Q04721	0	0	0	1
1883	NOTCH3	Neurogenic locus notch homolog protein 3	Q9UM47	1	1	1	1
1884	NPC2	NPC intracellular cholesterol transporter 2	P61916	0	0	0	1
1885	NPDC1	Neural proliferation differentiation and control protein 1	Q9NQX5	0	0	0	1
1886	NPHS1	Nephrin	O60500	0	0	0	1
1887	NPHS2	Podocin	Q9NP85	0	1	1	1
1888	NPL	N-acetylneuraminate lyase	Q9BXD5	0	0	1	1
1889	NPM1	Nucleophosmin	P06748	N/A	N/A	N/A	N/A
1890	NPPB	Natriuretic peptides B	P16860	0	1	1	1
1891	NPPC	C-type natriuretic peptide	P23582	0	1	0	1
1892	NPR1	Atrial natriuretic peptide receptor 1	P16066	1	0	0	1
1893	NPTN	Neuroplastin	Q9Y639	0	0	0	1
1894	NPTX1	Neuronal pentraxin-1	Q15818	0	0	0	1
1895	NPTX2	Neuronal pentraxin-2	P47972	0	0	1	1
1896	NPTXR	Neuronal pentraxin receptor	O95502	1	0	0	1
1897	NPY	Pro-neuropeptide Y	P01303	0	1	0	1
1898	NRCAM	Neuronal cell adhesion molecule	Q92823	0	0	0	1
1899	NRGN	Neurogranin	Q92686	1	0	0	1
1900	NRN1	Neuritin	Q9NPD7	0	0	0	1
1901	NRP1	Neuropilin-1	O14786	0	1	0	1
1902	NRP2	Neuropilin-2	O60462	0	1	0	1
1903	NRTN	Neurturin	Q99748	0	0	0	1
1904	NRXN3	Neurexin-3	Q9Y4C0	0	0	0	1
1905	NSFL1C	NSFL1 cofactor p47	Q9UNZ2	0	0	0	1
1906	NT5C	5'(3')-deoxyribonucleotidase, cytosolic type	Q8TCD5	0	0	0	1
1907	NT5C1A	Cytosolic 5'-nucleotidase 1A	Q9BXI3	0	1	0	1
1908	NT5C3A	Cytosolic 5'-nucleotidase 3A	Q9H0P0	0	0	0	1
1909	NT5E	5'-nucleotidase	P21589	1	1	0	1
1910	NTF3	Neurotrophin-3	P20783	1	0	0	1
1911	NTF4	Neurotrophin-4	P34130	0	0	0	1
1912	NTproBNP	N-terminal prohormone of brain natriuretic peptide	NTproBNP	0	0	1	1
1913	NTRK2	BDNF/NT-3 growth factors receptor	Q16620	0	0	1	1
1914	NTRK3	NT-3 growth factor receptor	Q16288	1	1	1	1
1915	NUB1	NEDD8 ultimate buster 1	Q9Y5A7	0	0	0	1
1916	NUBP1	Cytosolic Fe-S cluster assembly factor NUBP1	P53384	0	0	0	1
1917	NUCB2	Nucleobindin-2	P80303	0	0	0	1
1918	NUDC	Nuclear migration protein nudC	Q9Y266	0	0	0	1
1919	NUDT10	Diphosphoinositol polyphosphate phosphohydrolase 3-alpha	Q8NFP7	0	0	0	1
1920	NUDT15	Nucleotide triphosphate diphosphatase NUDT15	Q9NV35	0	0	0	1
1921	NUDT16	U8 snoRNA-decapping enzyme	Q96DE0	0	0	1	1
1922	NUDT2	Bis(5'-nucleosyl)-tetraphosphatase [asymmetrical]	P50583	0	0	0	1
1923	NUDT5	ADP-sugar pyrophosphatase	Q9UKK9	0	0	0	1
1924	NUMB	Protein numb homolog	P49757	0	1	1	1
1925	NUP50	Nuclear pore complex protein Nup50	Q9UKX7	0	0	0	1
1926	NXPE4	NXPE family member 4	Q6UWF7	0	0	0	1
1927	NXPH1	Neurexophilin-1	P58417	0	1	0	1
1928	NXPH3	Neurexophilin-3	O95157	1	0	1	1
1929	OBP2B	Odorant-binding protein 2b	Q9NPH6	0	0	0	1
1930	OCLN	Occludin	Q16625	0	0	0	1
1931	ODAM	Odontogenic ameloblast-associated protein	A1E959	0	0	0	1
1932	OFD1	Oral-facial-digital syndrome 1 protein	O75665	0	1	0	1
1933	OGA	Protein O-GlcNAcase	O60502	0	1	0	1
1934	OGFR	Opioid growth factor receptor	Q9NZT2	0	0	0	1
1935	OGN	Mimecan	P20774	1	0	0	1
1936	OGT	UDP-N-acetylglucosamine--peptide N-acetylglucosaminyltransferase 110 kDa subunit	O15294	0	0	0	1
1937	OLFM4	Olfactomedin-4	Q6UX06	0	1	0	1
1938	OLR1	Oxidized low-density lipoprotein receptor 1	P78380	0	1	0	1
1939	OMD	Osteomodulin	Q99983	1	0	1	1
1940	OMG	Oligodendrocyte-myelin glycoprotein	P23515	0	0	1	1
1941	OMP	Olfactory marker protein	P47874	0	0	0	1
1942	OPHN1	Oligophrenin-1	O60890	0	0	0	1
1943	OPLAH	5-oxoprolinase	O14841	0	0	1	1
1944	OPTC	Opticin	Q9UBM4	0	0	0	1
1945	ORM1	Alpha-1-acid glycoprotein 1	P02763	0	0	1	1
1946	OSBPL2	Oxysterol-binding protein-related protein 2	Q9H1P3	0	0	0	1
1947	OSCAR	Osteoclast-associated immunoglobulin-like receptor	Q8IYS5	0	1	0	1
1948	OSM	Oncostatin-M	P13725	0	0	1	1
1949	OSMR	Oncostatin-M-specific receptor subunit beta	Q99650	0	0	0	1
1950	OSTN	Osteocrin	P61366	0	0	0	1
1951	OTOA	Otoancorin	Q7RTW8	0	0	0	1
1952	OTUD6B	Deubiquitinase OTUD6B	Q8N6M0	0	0	0	1
1953	OTUD7B	OTU domain-containing protein 7B	Q6GQQ9	0	1	0	1
1954	OXCT1	Succinyl-CoA:3-ketoacid coenzyme A transferase 1, mitochondrial	P55809	0	0	0	1
1955	OXT	Oxytocin-neurophysin 1	P01178	0	0	0	1
1956	P4HB	Protein disulfide-isomerase	P07237	0	1	0	1
1957	PACS2	Phosphofurin acidic cluster sorting protein 2	Q86VP3	0	0	0	1
1958	PADI2	Protein-arginine deiminase type-2	Q9Y2J8	0	0	0	1
1959	PADI4	Protein-arginine deiminase type-4	Q9UM07	0	1	0	1
1960	PAEP	Glycodelin	P09466	0	1	0	1
1961	PAFAH1B3	Platelet-activating factor acetylhydrolase IB subunit alpha1	Q15102	0	0	0	1
1962	PAFAH2	Platelet-activating factor acetylhydrolase 2, cytoplasmic	Q99487	0	0	0	1
1963	PAG1	Phosphoprotein associated with glycosphingolipid-enriched microdomains 1	Q9NWQ8	0	0	0	1
1964	PAGR1	PAXIP1-associated glutamate-rich protein 1	Q9BTK6	0	0	0	1
1965	PAIP2B	Polyadenylate-binding protein-interacting protein 2B	Q9ULR5	0	0	0	1
1966	PAK4	Serine/threonine-protein kinase PAK 4	O96013	0	0	0	1
1967	PALLD	Palladin	Q8WX93	1	1	0	1
1968	PALM	Paralemmin-1	O75781	0	0	0	1
1969	PALM2	Paralemmin-2	Q8IXS6	1	1	0	1
1970	PALM3	Paralemmin-3	A6NDB9	0	0	0	1
1971	PAM	Peptidyl-glycine alpha-amidating monooxygenase	P19021	1	0	0	1
1972	PAMR1	Inactive serine protease PAMR1	Q6UXH9	0	0	1	1
1973	PAPPA	Pappalysin-1	Q13219	1	1	0	1
1974	PARD3	Partitioning defective 3 homolog	Q8TEW0	0	0	0	1
1975	PARK7	Parkinson disease protein 7	Q99497	0	0	0	1
1976	PARP1	Poly [ADP-ribose] polymerase 1	P09874	0	1	0	1
1977	PAXX	Protein PAXX	Q9BUH6	0	0	0	1
1978	PBK	Lymphokine-activated killer T-cell-originated protein kinase	Q96KB5	0	0	0	1
1979	PBLD	Phenazine biosynthesis-like domain-containing protein	P30039	0	0	0	1
1980	PBXIP1	Pre-B-cell leukemia transcription factor-interacting protein 1	Q96AQ6	0	0	0	1
1981	PCARE	Photoreceptor cilium actin regulator	A6NGG8	0	0	0	1
1982	PCBD1	Pterin-4-alpha-carbinolamine dehydratase	P61457	0	1	0	1
1983	PCBP2	Poly(rC)-binding protein 2	Q15366	0	0	0	1
1984	PCDH1	Protocadherin-1	Q08174	0	1	0	1
1985	PCDH12	Protocadherin-12	Q9NPG4	0	0	1	1
1986	PCDH17	Protocadherin-17	O14917	0	0	0	1
1987	PCDH7	Protocadherin-7	O60245	1	1	0	1
1988	PCDH9	Protocadherin-9	Q9HC56	0	0	1	1
1989	PCDHB15	Protocadherin beta-15	Q9Y5E8	0	0	0	1
1990	PCNA	Proliferating cell nuclear antigen	P12004	0	1	0	1
1991	PCOLCE	Procollagen C-endopeptidase enhancer 1	Q15113	N/A	N/A	N/A	N/A
1992	PCSK7	Proprotein convertase subtilisin/kexin type 7	Q16549	0	0	0	1
1993	PCSK9	Proprotein convertase subtilisin/kexin type 9	Q8NBP7	0	1	1	1
1994	PCYT2	Ethanolamine-phosphate cytidylyltransferase	Q99447	0	0	0	1
1995	PDAP1	28 kDa heat- and acid-stable phosphoprotein	Q13442	0	0	0	1
1996	PDCD1	Programmed cell death protein 1	Q15116	0	0	0	1
1997	PDCD1LG2	Programmed cell death 1 ligand 2	Q9BQ51	0	1	0	1
1998	PDCD5	Programmed cell death protein 5	O14737	0	0	0	1
[truncated: 925 more rows]

## Sheet: Supplemental Table S3
Supplemental Table S3: Summary of 10-times 5-fold cross-validation (in the training set) for different protein panels, presenting average scores. Abbreviations: ROC-AUC, the area under the receiver operating characteristic curve; LGBM, Light Gradient Boosting Machine; MLP, Multi-layer Perceptron; SVM, Support Vector Machines; XGBoost, eXtreme Gradient Boosting; MR, Mendelian Randomization.
Artery-enriched protein panel (n= 248)
Model	Accuracy	Precision	ROC_AUC	Recall
CatBoost	0.734034	0.745488	0.809525	0.708815
ElasticNET	0.74424	0.749066	0.816151	0.733032
LGBM	0.728931	0.737262	0.799638	0.709723
Logistic Regression	0.742064	0.746681	0.814469	0.731076
MLP	0.741726	0.744341	0.811861	0.734762
Random Forest	0.706604	0.719755	0.779234	0.674799
SVM	0.737749	0.744409	0.810955	0.722655
XGBoost	0.723865	0.730274	0.791755	0.707983
Atherosclerosis-related protein panel (n = 680)
Model	Accuracy	Precision	ROC_AUC	Recall
CatBoost	0.818236	0.831879	0.89322	0.797144
ElasticNET	0.787992	0.790513	0.869776	0.782624
LGBM	0.806116	0.818336	0.887092	0.786157
Logistic Regression	0.77955	0.780482	0.860356	0.776828
MLP	0.791932	0.796586	0.87071	0.783304
Random Forest	0.795159	0.803725	0.875239	0.78029
SVM	0.770732	0.770618	0.851556	0.769676
XGBoost	0.804503	0.815789	0.882247	0.785936
MR-derived protein panel (n = 402)
Model	Accuracy	Precision	ROC_AUC	Recall
CatBoost	0.818236	0.831879	0.89322	0.797144
ElasticNET	0.787992	0.790513	0.869776	0.782624
LGBM	0.806116	0.818336	0.887092	0.786157
Logistic Regression	0.77955	0.780482	0.860356	0.776828
MLP	0.791932	0.796586	0.87071	0.783304
Random Forest	0.795159	0.803725	0.875239	0.78029
SVM	0.770732	0.770618	0.851556	0.769676
XGBoost	0.804503	0.815789	0.882247	0.785936
Whole proteome panel (n=2920)
Model	Accuracy	Precision	ROC_AUC	Recall
CatBoost	0.82818	0.841085	0.902464	0.808734
ElasticNET	0.794597	0.7996	0.873466	0.785333
LGBM	0.81272	0.824406	0.89142	0.79398
Logistic Regression	0.789493	0.792156	0.86783	0.784278
MLP	0.793096	0.800484	0.872116	0.780066
Random Forest	0.779812	0.791136	0.859112	0.7596
SVM	0.806904	0.817846	0.887181	0.788947
XGBoost	0.813246	0.823847	0.887771	0.796313

## Sheet: Supplemental Table S4
Supplemental Table S4: Summary of model performance (in the testing set) for different protein panels. Abbreviations: ROC-AUC, the area under the receiver operating characteristic curve; LGBM, Light Gradient Boosting Machine; MLP, Multi-layer Perceptron; SVM, Support Vector Machines; XGBoost, eXtreme Gradient Boosting; MR, Mendelian Randomization.
Artery-enriched protein panel (n= 248)
Model	Test Accuracy	Test Recall	Test Precision	Test ROC AUC	Test F1 score
CatBoost	0.773613	0.735905	0.8	0.841696	0.766615
MLP	0.770615	0.756677	0.782209	0.847307	0.769231
Logistic Regression	0.766117	0.721068	0.796721	0.839817	0.757009
ElasticNET	0.764618	0.718101	0.796053	0.840302	0.75507
LGBM	0.76012	0.72997	0.780952	0.832938	0.754601
SVM	0.76012	0.738872	0.775701	0.846219	0.756839
XGBoost	0.745127	0.718101	0.763407	0.827066	0.740061
Random Forest	0.721139	0.68546	0.742765	0.801232	0.712963
Atherosclerosis-related protein panel (n = 680)
Model	Test Accuracy	Test Recall	Test Precision	Test ROC AUC	Test F1 score
CatBoost	0.826087	0.810089	0.84	0.909487	0.824773
LGBM	0.823088	0.810089	0.834862	0.903489	0.822289
XGBoost	0.82009	0.807122	0.831804	0.897824	0.819277
MLP	0.815592	0.792285	0.834375	0.891862	0.812785
ElasticNET	0.8006	0.780415	0.81677	0.885325	0.798179
Random Forest	0.797601	0.789318	0.806061	0.875546	0.797601
Logistic Regression	0.770615	0.744807	0.789308	0.863043	0.766412
SVM	0.757121	0.732938	0.774295	0.85013	0.753049
MR-derived protein panel (n = 402)
Model	Test Accuracy	Test Recall	Test Precision	Test ROC AUC	Test F1 score
CatBoost	0.829085	0.801187	0.851735	0.912984	0.825688
LGBM	0.823088	0.804154	0.839009	0.912283	0.821212
XGBoost	0.817091	0.795252	0.834891	0.90214	0.81459
MLP	0.809595	0.78635	0.828125	0.892321	0.806697
Random Forest	0.808096	0.789318	0.823529	0.891916	0.806061
Logistic Regression	0.808096	0.78635	0.825545	0.885793	0.805471
ElasticNET	0.808096	0.78635	0.825545	0.889614	0.805471
SVM	0.7991	0.777448	0.816199	0.884183	0.796353
Whole proteome panel (n=2920)
Model	Test Accuracy	Test Recall	Test Precision	Test ROC AUC	Test F1 score
CatBoost	0.832084	0.813056	0.848297	0.919369	0.830303
LGBM	0.821589	0.810089	0.832317	0.902635	0.821053
SVM	0.82009	0.801187	0.835913	0.898166	0.818182
XGBoost	0.812594	0.792285	0.829193	0.906807	0.810319
ElasticNET	0.808096	0.783383	0.827586	0.888985	0.804878
MLP	0.808096	0.768546	0.838188	0.889335	0.801858
Logistic Regression	0.802099	0.78635	0.815385	0.886827	0.800604
Random Forest	0.797601	0.774481	0.815625	0.875429	0.794521

## Sheet: Supplemental Table S5
Supplemental Table S5. Baseline characteristics of UK Biobank participants in internal validation cohort. Abbreviations: BMI, body mass index; LDL, low density lipoprotein; HDL, high density lipoprotein; HbA1c, Glycated hemoglobin A1c; eGFR: Estimated glomerular filtration rate; MACE, major adverse cardiovascular events.
Characteristic	Overall N = 41,200	No MACE N = 38,078	MACE N = 3,122	p value*
Age at recruitment (years), Median (Q1, Q3)	58.00 (50.00, 63.00)	57.00 (49.00, 63.00)	63.00 (57.00, 66.00)	<0.001
Sex, n (%)				<0.001
Female	23,143 (56%)	21,951 (58%)	1,192 (38%)
Male	18,057 (44%)	16,127 (42%)	1,930 (62%)
Previous smoking, n (%)	14,063 (34%)	12,853 (34%)	1,210 (39%)	<0.001
Current smoking, n (%)	4,412 (11%)	3,834 (10%)	578 (19%)	<0.001
Cystatin C (mg/L), Median (Q1, Q3)	0.89 (0.81, 0.98)	0.88 (0.80, 0.97)	0.96 (0.87, 1.08)	<0.001
Cholesterol (mmol/L), Median (Q1, Q3)	5.66 (4.95, 6.40)	5.67 (4.97, 6.40)	5.53 (4.76, 6.38)	<0.001
LDL direct (mmol/L), Median (Q1, Q3)	3.52 (2.98, 4.10)	3.53 (2.98, 4.10)	3.47 (2.86, 4.10)	<0.001
HDL Cholesterol (mmol/L), Median (Q1, Q3)	1.41 (1.19, 1.68)	1.42 (1.20, 1.68)	1.30 (1.10, 1.55)	<0.001
Triglycerides (mmol/L), Median (Q1, Q3)	1.48 (1.06, 2.13)	1.47 (1.05, 2.10)	1.68 (1.19, 2.37)	<0.001
Creatinine (umol/L), Median (Q1, Q3)	70.00 (61.30, 80.10)	69.70 (61.20, 79.70)	74.30 (64.00, 85.30)	<0.001
BMI (kg/m^2), Median (Q1, Q3)	26.75 (24.13, 29.87)	26.68 (24.08, 29.77)	27.77 (25.02, 31.04)	<0.001
eGFR (ml/min/1.73m^2), Median (Q1, Q3)	95.58 (85.41, 105.01)	96.20 (86.14, 105.41)	88.41 (77.03, 97.90)	<0.001
HbA1c (mmol/L), Median (Q1, Q3)	35.28 (32.90, 37.90)	35.20 (32.80, 37.70)	36.70 (34.00, 40.00)	<0.001
Diastolic blood pressure (mmHg), Median (Q1, Q3)	82.00 (75.00, 89.00)	82.00 (75.00, 89.00)	84.00 (76.00, 91.00)	<0.001
Systolic blood pressure (mmHg), Median (Q1, Q3)	138.00 (125.00, 152.00)	137.00 (125.00, 151.00)	146.00 (132.00, 160.00)	<0.001
Blood Pressure Medication, n (%)	8,631 (21%)	7,444 (20%)	1,187 (38%)	<0.001
Cholesterol Lowering Medication, n (%)	6,449 (16%)	5,561 (15%)	888 (28%)	<0.001
Diabetes, n (%)	1,650 (4.0%)	1,320 (3.5%)	330 (11%)	<0.001
Hypertension, n (%)	9,195 (22%)	7,903 (21%)	1,292 (41%)	<0.001
*Wilcoxon rank sum test; Pearson's Chi-squared test	Wilcoxon rank sum test; Pearson's Chi-squared test	Wilcoxon rank sum test; Pearson's Chi-squared test	Wilcoxon rank sum test; Pearson's Chi-squared test	Wilcoxon rank sum test; Pearson's Chi-squared test

## Sheet: Supplemental Table S6
Supplemental Table S6: Hazard Ratios (HR) and 95% Confidence Intervals (CI) for AtheroBurden scores on major adverse cardiovascular events (MACE) and its component events across different models. This table provides HR and 95% CI for associations between four AtheroBurden scores and MACE, including individual endpoints (stroke, AMI, and cardiovascular death). Three models were used, Model 1 adjus…
AtheroBurden Signatures	estimate	std.error	p value	model	p-adjust	HR (95% CI)	Significance	Endpoint
AtheroBurden Arterial Signature	0.486564	0.0167338	7.06375e-186	model1	1.93386e-185	1.627 (1.574-1.681)	***	MACE
AtheroBurden Genetic Signature	0.477916	0.0165515	2.49379e-183	model1	3.32505e-183	1.613 (1.561-1.666)	***	MACE
AtheroBurden Mechanistic Signature	0.464389	0.0175177	7.49075e-155	model1	7.49075e-155	1.591 (1.537-1.647)	***	MACE
AtheroBurden WholeProteome Signature	0.510505	0.0175637	9.66931e-186	model1	1.93386e-185	1.666 (1.61-1.724)	***	MACE
AtheroBurden Arterial Signature	0.473458	0.018761	1.60359e-140	model2	2.13813e-140	1.606 (1.548-1.666)	***	MACE
AtheroBurden Genetic Signature	0.521797	0.0193253	1.44939e-160	model2	5.79757e-160	1.685 (1.622- 1.750 )	***	MACE
AtheroBurden Mechanistic Signature	0.501455	0.0204658	1.40362e-132	model2	1.40362e-132	1.651 (1.586-1.719)	***	MACE
AtheroBurden WholeProteome Signature	0.532117	0.0201617	1.66994e-153	model2	3.33989e-153	1.703 (1.637-1.771)	***	MACE
AtheroBurden Arterial Signature	0.398361	0.0223983	9.17724e-71	model3	1.22363e-70	1.489 (1.425-1.556)	***	MACE
AtheroBurden Genetic Signature	0.440849	0.0230481	1.49468e-81	model3	5.97872e-81	1.554 (1.485-1.626)	***	MACE
AtheroBurden Mechanistic Signature	0.398795	0.024716	1.44633e-58	model3	1.44633e-58	1.49 (1.42-1.564)	***	MACE
AtheroBurden WholeProteome Signature	0.439537	0.023519	6.13158e-78	model3	1.22632e-77	1.552 (1.482-1.625)	***	MACE
AtheroBurden Arterial Signature	0.379588	0.0292436	1.58494e-38	model1	6.33978e-38	1.462 (1.38-1.548)	***	Stroke
AtheroBurden Genetic Signature	0.350849	0.0291696	2.53561e-33	model1	3.38082e-33	1.42 (1.341-1.504)	***	Stroke
AtheroBurden Mechanistic Signature	0.331223	0.0304432	1.43507e-27	model1	1.43507e-27	1.393 (1.312-1.478)	***	Stroke
AtheroBurden WholeProteome Signature	0.373491	0.0305896	2.75712e-34	model1	5.51423e-34	1.453 (1.368-1.543)	***	Stroke
AtheroBurden Arterial Signature	0.35945	0.0325611	2.4711e-28	model2	9.8846e-28	1.433 (1.344-1.527)	***	Stroke
AtheroBurden Genetic Signature	0.35624	0.034035	1.2265e-25	model2	1.7468e-25	1.428 (1.336-1.526)	***	Stroke
AtheroBurden Mechanistic Signature	0.331759	0.0354514	8.1162e-21	model2	8.1162e-21	1.393 (1.3-1.494)	***	Stroke
AtheroBurden WholeProteome Signature	0.365033	0.034896	1.3101e-25	model2	1.7468e-25	1.441 (1.345-1.543)	***	Stroke
AtheroBurden Arterial Signature	0.301129	0.038223	3.32075e-15	model3	1.3283e-14	1.351 (1.254-1.457)	***	Stroke
AtheroBurden Genetic Signature	0.274295	0.0399277	6.4303e-12	model3	8.57374e-12	1.316 (1.217-1.423)	***	Stroke
AtheroBurden Mechanistic Signature	0.230884	0.0422002	4.47089e-08	model3	4.47089e-08	1.26 (1.16-1.368)	***	Stroke
AtheroBurden WholeProteome Signature	0.279005	0.0400654	3.31341e-12	model3	6.62682e-12	1.322 (1.222-1.43)	***	Stroke
AtheroBurden Arterial Signature	0.395022	0.0291414	7.36364e-42	model1	2.60948e-41	1.484 (1.402-1.572)	***	AMI
AtheroBurden Genetic Signature	0.385822	0.0289637	1.75027e-40	model1	2.33369e-40	1.471 (1.39-1.557)	***	AMI
AtheroBurden Mechanistic Signature	0.350933	0.0303346	5.93389e-31	model1	5.93389e-31	1.42 (1.338-1.507)	***	AMI
AtheroBurden WholeProteome Signature	0.411029	0.0304165	1.30474e-41	model1	2.60948e-41	1.508 (1.421-1.601)	***	AMI
AtheroBurden Arterial Signature	0.357225	0.0326291	6.7888e-28	model2	6.7888e-28	1.429 (1.341-1.524)	***	AMI
AtheroBurden Genetic Signature	0.444427	0.0336055	6.3062e-40	model2	2.5225e-39	1.56 (1.46-1.666)	***	AMI
AtheroBurden Mechanistic Signature	0.394014	0.0351648	3.8632e-29	model2	5.151e-29	1.483 (1.384-1.589)	***	AMI
AtheroBurden WholeProteome Signature	0.431264	0.0348112	3.0111e-35	model2	6.0222e-35	1.539 (1.438-1.648)	***	AMI
AtheroBurden Arterial Signature	0.327951	0.0381255	7.8415e-18	model3	1.0455e-17	1.388 (1.288-1.496)	***	AMI
AtheroBurden Genetic Signature	0.401008	0.0393543	2.2045e-24	model3	8.8178e-24	1.493 (1.382-1.613)	***	AMI
AtheroBurden Mechanistic Signature	0.330091	0.0417479	2.6415e-15	model3	2.6415e-15	1.391 (1.282-1.51)	***	AMI
AtheroBurden WholeProteome Signature	0.379769	0.0399453	1.9581e-21	model3	3.9162e-21	1.462 (1.352-1.581)	***	AMI
AtheroBurden Arterial Signature	0.750623	0.0238772	6.34194e-217	model1	2.53678e-216	2.118 (2.021-2.22)	***	CV Death
AtheroBurden Genetic Signature	0.736026	0.0236098	2.35248e-213	model1	3.13664e-213	2.088 (1.993-2.186)	***	CV Death
AtheroBurden Mechanistic Signature	0.752608	0.0254849	1.13573e-191	model1	1.13573e-191	2.123 (2.019-2.231)	***	CV Death
AtheroBurden WholeProteome Signature	0.790181	0.0253169	7.4079e-214	model1	1.48158e-213	2.204 (2.097-2.316)	***	CV Death
AtheroBurden Arterial Signature	0.759124	0.0268998	3.28509e-175	model2	4.38011e-175	2.136 (2.027-2.252)	***	CV Death
AtheroBurden Genetic Signature	0.797645	0.0277156	3.8637e-182	model2	1.54548e-181	2.22 (2.103-2.344)	***	CV Death
AtheroBurden Mechanistic Signature	0.819261	0.0300126	4.57769e-164	model2	4.57769e-164	2.269 (2.139-2.406)	***	CV Death
AtheroBurden WholeProteome Signature	0.831848	0.0291829	1.02619e-178	model2	2.05238e-178	2.298 (2.17-2.433)	***	CV Death
AtheroBurden Arterial Signature	0.628806	0.0328978	1.93389e-81	model3	2.57851e-81	1.875 (1.758-2)	***	CV Death
AtheroBurden Genetic Signature	0.676598	0.0336548	6.79866e-90	model3	2.71946e-89	1.967 (1.842-2.101)	***	CV Death
AtheroBurden Mechanistic Signature	0.672888	0.0368099	1.19306e-74	model3	1.19306e-74	1.96 (1.823-2.107)	***	CV Death
AtheroBurden WholeProteome Signature	0.689091	0.0347241	1.22319e-87	model3	2.44637e-87	1.992 (1.861-2.132)	***	CV Death

## Sheet: Supplemental Table S7
Supplemental Table S7. Baseline characteristics of UK Biobank participants in the carotid ultrasound subset (with available ultrasound imaging and proteomics data). Abbreviations: BMI, body mass index; LDL, low density lipoprotein; HDL, high density lipoprotein; HbA1c,Glycated hemoglobin A1c; eGFR: Estimated glomerular filtration rate.
Characteristic	Overall N = 1,712	Plaque presence N = 995	No Plaque presence N = 717	p value*
Age at recruitment (years), Median (Q1, Q3)	55.50 (49.00, 61.00)	54.00 (48.00, 61.00)	57.00 (50.00, 62.00)	<0.001
Sex, n (%)				0.014
Female	881 (51%)	537 (54%)	344 (48%)
Male	831 (49%)	458 (46%)	373 (52%)
Waist circumference (cm), Median (Q1, Q3)	88.00 (79.00, 97.00)	88.00 (78.00, 97.00)	88.00 (79.00, 96.00)	0.844
Hip circumference (cm), Median (Q1, Q3)	101.40 (97.00, 107.00)	102.00 (97.00, 107.00)	101.00 (97.00, 106.00)	0.084
Previous smoking, n (%)	590 (34%)	343 (34%)	247 (34%)	0.992
Current smoking, n (%)	105 (6.1%)	61 (6.1%)	44 (6.1%)	0.996
Cystatin C (mg/L), Median (Q1, Q3)	0.86 (0.79, 0.95)	0.86 (0.79, 0.94)	0.86 (0.79, 0.95)	0.899
Cholesterol (mmol/L), Median (Q1, Q3)	5.60 (4.90, 6.37)	5.55 (4.88, 6.35)	5.66 (4.93, 6.42)	0.276
LDL direct (mmol/L), Median (Q1, Q3)	3.48 (2.93, 4.05)	3.45 (2.91, 4.04)	3.54 (2.95, 4.05)	0.234
HDL Cholesterol (mmol/L), Median (Q1, Q3)	1.43 (1.20, 1.68)	1.42 (1.19, 1.69)	1.44 (1.20, 1.67)	0.701
Triglycerides (mmol/L), Median (Q1, Q3)	1.43 (1.02, 2.00)	1.44 (1.03, 1.94)	1.41 (1.01, 2.06)	0.668
Creatinine (umol/L), Median (Q1, Q3)	71.30 (62.80, 81.90)	70.86 (62.50, 81.70)	72.50 (63.40, 82.00)	0.148
BMI (kg/m^2), Median (Q1, Q3)	26.07 (23.57, 28.94)	26.40 (23.78, 29.40)	25.66 (23.44, 28.51)	0.02
eGFR (ml/min/1.73m^2), Median (Q1, Q3)	98.13 (88.66, 106.84)	98.13 (89.17, 107.05)	98.15 (87.73, 106.54)	0.376
HbA1c (mmol/L), Median (Q1, Q3)	34.60 (32.40, 36.90)	34.40 (32.20, 36.70)	34.80 (32.60, 37.40)	0.002
Diastolic blood pressure (mmHg), Median (Q1, Q3)	81.00 (74.00, 88.00)	81.00 (74.00, 89.00)	81.00 (74.00, 88.00)	0.852
Systolic blood pressure (mmHg), Median (Q1, Q3)	136.00 (124.00, 149.00)	135.00 (123.00, 148.00)	138.00 (125.00, 150.00)	0.006
Blood Pressure Medication, n (%)	454 (27%)	239 (24%)	215 (30%)	0.006
Cholesterol Lowering Medication, n (%)	397 (23%)	190 (19%)	207 (29%)	<0.001
Diabetes, n (%)	22 (1.3%)	10 (1.0%)	12 (1.7%)	0.226
Hypertension, n (%)	462 (27%)	244 (25%)	218 (30%)	0.007
*Wilcoxon rank sum test; Pearson's Chi-squared test	Wilcoxon rank sum test; Pearson's Chi-squared test	Wilcoxon rank sum test; Pearson's Chi-squared test	Wilcoxon rank sum test; Pearson's Chi-squared test	Wilcoxon rank sum test; Pearson's Chi-squared test

## Sheet: Supplemental Table S8
Supplemental Table S8. Association between AtheroBurden signatures and carotid plaque presence and burden from regression analyses. This table summarizes the association between four AtheroBurden signatures (AtheroBurden-Arterial, -Mechanistic, -Genetic, and -WholeProteome) and carotid plaque presence and burden. Logistic regression models report OR, while Poisson regression models reports RR, wi…
Regression_type	model	AtheroBurden signature	Estimate_type	Estimate	CI lower	CI upper	p value	p-adjusted	Significance
Logistic	model1	AtheroBurden Arterial signature	OR	0.968141	0.863562	1.08539	0.578799	0.578799
Poisson	model1	AtheroBurden Arterial signature	RR	0.982966	0.911758	1.05973	0.654296	0.654296
Logistic	model1	AtheroBurden Mechanistic signature	OR	1.17964	1.05157	1.32331	0.00483825	0.0078244	**
Poisson	model1	AtheroBurden Mechanistic signature	RR	1.07433	0.999938	1.15426	0.0501932	0.0827631
Logistic	model1	AtheroBurden Genetic signature	OR	1.18351	1.05161	1.33196	0.00519385	0.0078244	**
Poisson	model1	AtheroBurden Genetic signature	RR	1.07285	0.996455	1.15509	0.0620723	0.0827631
Logistic	model1	AtheroBurden WholeProteome signature	OR	1.17198	1.04686	1.31205	0.0058683	0.0078244	**
Poisson	model1	AtheroBurden WholeProteome signature	RR	1.08962	1.01523	1.16947	0.0173703	0.069481
Logistic	model2	AtheroBurden Arterial signature	OR	0.981709	0.868258	1.10998	0.768282	0.768282
Poisson	model2	AtheroBurden Arterial signature	RR	0.99326	0.916206	1.07679	0.869614	0.869614
Logistic	model2	AtheroBurden Mechanistic signature	OR	1.26052	1.10808	1.43393	0.000430577	0.000932207	***
Poisson	model2	AtheroBurden Mechanistic signature	RR	1.11721	1.03049	1.21122	0.00717442	0.0136498	*
Logistic	model2	AtheroBurden Genetic signature	OR	1.26672	1.10875	1.4472	0.000503125	0.000932207	***
Poisson	model2	AtheroBurden Genetic signature	RR	1.11598	1.02631	1.21347	0.0102373	0.0136498	*
Logistic	model2	AtheroBurden WholeProteome signature	OR	1.24074	1.09526	1.40556	0.000699155	0.000932207	***
Poisson	model2	AtheroBurden WholeProteome signature	RR	1.1298	1.04457	1.22199	0.00229107	0.00916428	**
Logistic	model3	AtheroBurden Arterial signature	OR	1.04761	0.91174	1.20372	0.511684	0.511684
Poisson	model3	AtheroBurden Arterial signature	RR	1.02932	0.940017	1.12711	0.532524	0.532524
Logistic	model3	AtheroBurden Mechanistic signature	OR	1.36299	1.1789	1.57582	2.87479e-05	0.000101851	***
Poisson	model3	AtheroBurden Mechanistic signature	RR	1.15328	1.05479	1.26098	0.00174183	0.00348367	**
Logistic	model3	AtheroBurden Genetic signature	OR	1.36282	1.17327	1.583	5.09255e-05	0.000101851	***
Poisson	model3	AtheroBurden Genetic signature	RR	1.14941	1.04784	1.26082	0.00317716	0.00423622	**
Logistic	model3	AtheroBurden WholeProteome signature	OR	1.30848	1.14242	1.49868	0.000103182	0.000137577	***
Poisson	model3	AtheroBurden WholeProteome signature	RR	1.15681	1.0634	1.25842	0.000696102	0.00278441	**

## Sheet: Supplemental Table S9
Supplemental Table S9. Baseline characteristics of UK Biobank participants with longitudinal proteomic assessments compared to those with single proteomic assessment. Abbreviations: BMI, body mass index; LDL, low density lipoprotein; HDL, high density lipoprotein; HbA1c,Glycated hemoglobin A1c; eGFR: Estimated glomerular filtration rate.
Characteristic	Overall N = 53,021	Single proteomic assessment N = 51,811	Longitudinal proteomic assessments N = 1,210	p value*
Sex, n (%)				0.752
Female	28,630 (54%)	27,977(54%)	653 (54%)
Male	24,437 (46%)	23,834 (46%)	557 (46%)
Age at recruitment (years), Median (Q1, Q3)	58.00 (50.00, 64.00)	58.00 (51.00, 64.00)	49.00 (44.00, 55.00)	<0.001
BMI (kg/m^2), Median (Q1, Q3)	26.79 (24.19, 29.92)	26.82 (24.22, 29.96)	25.86 (23.28, 28.58)	<0.001
Diastolic blood pressure (mmHg), Median (Q1, Q3)	82.00 (75.00, 89.00)	82.00 (75.00, 89.00)	80.00 (73.00, 87.00)	<0.001
Systolic blood pressure (mmHg), Median (Q1, Q3)	138.00 (126.00, 152.00)	138.00 (126.00, 152.00)	131.00 (121.00, 143.00)	<0.001
Cholesterol (mmol/L), Median (Q1, Q3)	5.62 (4.89, 6.37)	5.62 (4.89, 6.37)	5.59 (4.94, 6.22)	0.312
LDL direct (mmol/L), Median (Q1, Q3)	3.49 (2.93, 4.08)	3.49 (2.93, 4.08)	3.47 (3.00, 4.00)	0.602
HDL Cholesterol (mmol/L), Median (Q1, Q3)	1.40 (1.17, 1.67)	1.40 (1.17, 1.67)	1.42 (1.22, 1.67)	0.009
Triglycerides (mmol/L), Median (Q1, Q3)	1.49 (1.06, 2.14)	1.50 (1.07, 2.15)	1.29 (0.94, 1.92)	<0.001
eGFR (ml/min/1.73m^2), Median (Q1, Q3)	94.98 (84.64, 104.56)	94.82 (84.47, 104.41)	101.91 (92.60, 109.64)	<0.001
HbA1c (mmol/L), Median (Q1, Q3)	35.30 (33.00, 38.00)	35.40 (33.00, 38.10)	33.99 (31.70, 36.20)	<0.001
Current smoking, n (%)	5,624 (11%)	5,548 (11%)	76 (6.3%)	<0.001
Blood Pressure Medication, n (%)	12,551 (24%)	12,355 (24%)	196 (16%)	<0.001
Cholesterol Lowering Medication, n (%)	9,851 (19%)	9,675 (19%)	176 (15%)	<0.001
Diabetes, n (%)	2,455 (4.6%)	2,441 (4.7%)	14 (1.2%)	<0.001
Hypertension, n (%)	13,355 (25%)	13,158 (25%)	197 (16%)	<0.001
Pearson's Chi-squared test; Wilcoxon rank sum test	Pearson's Chi-squared test; Wilcoxon rank sum test	Pearson's Chi-squared test; Wilcoxon rank sum test	Pearson's Chi-squared test; Wilcoxon rank sum test	Pearson's Chi-squared test; Wilcoxon rank sum test

## Sheet: Supplemental Table S10
Supplemental Table S10: Protein overlap between Olink® Explore 3072 and Olink® Explore 1536 across four restricted models. This table lists proteins from the logitudinal analysis in the UK Biobank instance 2/3. It also indicates the inclusion of these proteins in four proteomic models. Each protein is identified by its short name in both datasets, with their corresponding UniProt IDs. A "1" denot…
Protein Short Name (UK Biobank)	Description	UniProt ID	Artery enriched panel (n=248)	Artherosclerosis related panel (n=680)	MR derived panel (n=402)	Whole proteome panel (n=2920)	in olink Explore 1536	Restricted Artery enriched panel	Restricted Artherosclerosis related panel	Restricted MR derived panel	Restricted Whole proteome panel
A1BG	Alpha-1B-glycoprotein	P04217	0	0	0	1	FALSE	Not applicable	Not applicable	Not applicable	Not applicable
AAMDC	Mth938 domain-containing protein	Q9H7C9	0	0	1	1	FALSE	Not applicable	Not applicable	Not applicable	Not applicable
AARSD1	Alanyl-tRNA editing protein Aarsd1	Q9BTE6	0	0	0	1	TRUE	0	0	0	1
ABCA2	ATP-binding cassette sub-family A member 2	Q9BZC7	0	0	0	1	FALSE	Not applicable	Not applicable	Not applicable	Not applicable
ABHD14B	Protein ABHD14B	Q96IU4	0	0	0	1	TRUE	0	0	0	1
ABL1	Tyrosine-protein kinase ABL1	P00519	0	0	0	1	TRUE	0	0	0	1
ABO	Histo-blood group ABO system transferase	P16442	0	1	0	1	FALSE	Not applicable	Not applicable	Not applicable	Not applicable
ABRAXAS2	BRISC complex subunit Abraxas 2	Q15018	0	0	0	1	FALSE	Not applicable	Not applicable	Not applicable	Not applicable
ACAA1	3-ketoacyl-CoA thiolase, peroxisomal	P09110	0	0	1	1	TRUE	0	0	1	1
ACADM	Medium-chain specific acyl-CoA dehydrogenase, mitochondrial	P11310	0	0	0	1	FALSE	Not applicable	Not applicable	Not applicable	Not applicable
ACADSB	Short/branched chain specific acyl-CoA dehydrogenase, mitochondrial	P45954	0	0	0	1	FALSE	Not applicable	Not applicable	Not applicable	Not applicable
ACAN	Aggrecan core protein	P16112	1	1	0	1	TRUE	1	1	0	1
ACE	Angiotensin-converting enzyme	P12821	0	1	0	1	FALSE	Not applicable	Not applicable	Not applicable	Not applicable
ACE2	Angiotensin-converting enzyme 2	Q9BYF1	0	1	0	1	TRUE	0	1	0	1
ACHE	Acetylcholinesterase	P22303	0	1	0	1	FALSE	Not applicable	Not applicable	Not applicable	Not applicable
ACOT13	Acyl-coenzyme A thioesterase 13	Q9NPJ3	0	0	0	1	FALSE	Not applicable	Not applicable	Not applicable	Not applicable
ACOX1	Peroxisomal acyl-coenzyme A oxidase 1	Q15067	0	0	0	1	TRUE	0	0	0	1
ACP1	Low molecular weight phosphotyrosine protein phosphatase	P24666	0	0	0	1	FALSE	Not applicable	Not applicable	Not applicable	Not applicable
ACP5	Tartrate-resistant acid phosphatase type 5	P13686	0	0	0	1	TRUE	0	0	0	1
ACP6	Lysophosphatidic acid phosphatase type 6	Q9NPH0	0	0	1	1	TRUE	0	0	1	1
ACRBP	Acrosin-binding protein	Q8NEB7	0	0	0	1	FALSE	Not applicable	Not applicable	Not applicable	Not applicable
ACRV1	Acrosomal protein SP-10	P26436	0	0	0	1	FALSE	Not applicable	Not applicable	Not applicable	Not applicable
ACSL1	Long-chain-fatty-acid--CoA ligase 1	P33121	0	1	0	1	FALSE	Not applicable	Not applicable	Not applicable	Not applicable
ACTA2	Actin, aortic smooth muscle	P62736	1	0	0	1	TRUE	1	0	0	1
ACTN2	Alpha-actinin-2	P35609	1	0	0	1	FALSE	Not applicable	Not applicable	Not applicable	Not applicable
ACTN4	Alpha-actinin-4	O43707	0	0	0	1	TRUE	0	0	0	1
ACVRL1	Serine/threonine-protein kinase receptor R3	P37023	0	0	0	1	TRUE	0	0	0	1
ACY1	Aminoacylase-1	Q03154	0	0	0	1	TRUE	0	0	0	1
ACY3	N-acyl-aromatic-L-amino acid amidohydrolase	Q96HD9	0	0	0	1	FALSE	Not applicable	Not applicable	Not applicable	Not applicable
ACYP1	Acylphosphatase-1	P07311	0	0	0	1	FALSE	Not applicable	Not applicable	Not applicable	Not applicable
ADA	Adenosine deaminase	P00813	0	0	0	1	TRUE	0	0	0	1
ADA2	Adenosine deaminase 2	Q9NZK5	0	0	0	1	TRUE	0	0	0	1
ADAM12	Disintegrin and metalloproteinase domain-containing protein 12	O43184	0	1	0	1	FALSE	Not applicable	Not applicable	Not applicable	Not applicable
ADAM15	Disintegrin and metalloproteinase domain-containing protein 15	Q13444	0	1	0	1	TRUE	0	1	0	1
ADAM22	Disintegrin and metalloproteinase domain-containing protein 22	Q9P0K1	0	0	1	1	TRUE	0	0	1	1
ADAM23	Disintegrin and metalloproteinase domain-containing protein 23	O75077	0	0	1	1	TRUE	0	0	1	1
ADAM8	Disintegrin and metalloproteinase domain-containing protein 8	P78325	0	1	0	1	TRUE	0	1	0	1
ADAM9	Disintegrin and metalloproteinase domain-containing protein 9	Q13443	0	1	1	1	FALSE	Not applicable	Not applicable	Not applicable	Not applicable
ADAMTS1	A disintegrin and metalloproteinase with thrombospondin motifs 1	Q9UHI8	1	1	0	1	FALSE	Not applicable	Not applicable	Not applicable	Not applicable
ADAMTS13	A disintegrin and metalloproteinase with thrombospondin motifs 13	Q76LX8	0	0	0	1	TRUE	0	0	0	1
ADAMTS15	A disintegrin and metalloproteinase with thrombospondin motifs 15	Q8TE58	1	0	0	1	TRUE	1	0	0	1
ADAMTS16	A disintegrin and metalloproteinase with thrombospondin motifs 16	Q8TE57	0	0	0	1	TRUE	0	0	0	1
ADAMTS4	A disintegrin and metalloproteinase with thrombospondin motifs 4	O75173	0	1	0	1	FALSE	Not applicable	Not applicable	Not applicable	Not applicable
ADAMTS8	A disintegrin and metalloproteinase with thrombospondin motifs 8	Q9UP79	1	0	0	1	TRUE	1	0	0	1
ADAMTSL2	ADAMTS-like protein 2	Q86TH1	0	0	0	1	FALSE	Not applicable	Not applicable	Not applicable	Not applicable
ADAMTSL4	ADAMTS-like protein 4	Q6UY14	0	0	0	1	FALSE	Not applicable	Not applicable	Not applicable	Not applicable
ADAMTSL5	ADAMTS-like protein 5	Q6ZMM2	0	0	0	1	FALSE	Not applicable	Not applicable	Not applicable	Not applicable
ADCYAP1R1	Pituitary adenylate cyclase-activating polypeptide type I receptor	P41586	0	0	0	1	TRUE	0	0	0	1
ADD1	Alpha-adducin	P35611	0	1	0	1	FALSE	Not applicable	Not applicable	Not applicable	Not applicable
ADGRB3	Adhesion G protein-coupled receptor B3	O60242	0	0	1	1	TRUE	0	0	1	1
ADGRD1	Adhesion G-protein coupled receptor D1	Q6QNK2	0	0	0	1	FALSE	Not applicable	Not applicable	Not applicable	Not applicable
ADGRE1	Adhesion G protein-coupled receptor E1	Q14246	0	0	0	1	FALSE	Not applicable	Not applicable	Not applicable	Not applicable
ADGRE2	Adhesion G protein-coupled receptor E2	Q9UHX3	0	0	1	1	TRUE	0	0	1	1
ADGRE5	Adhesion G protein-coupled receptor E5	P48960	1	0	1	1	TRUE	1	0	1	1
ADGRF5	Adhesion G protein-coupled receptor F5	Q8IZF2	0	0	0	1	FALSE	Not applicable	Not applicable	Not applicable	Not applicable
ADGRG1	Adhesion G-protein coupled receptor G1	Q9Y653	0	0	0	1	TRUE	0	0	0	1
ADGRG2	Adhesion G-protein coupled receptor G2	Q8IZP9	1	0	0	1	TRUE	1	0	0	1
ADGRV1	Adhesion G-protein coupled receptor V1	Q8WXG9	0	0	0	1	FALSE	Not applicable	Not applicable	Not applicable	Not applicable
ADH1B	All-trans-retinol dehydrogenase	P00325	1	0	0	1	FALSE	Not applicable	Not applicable	Not applicable	Not applicable
ADH4	All-trans-retinol dehydrogenase [NAD(+)] ADH4	P08319	1	0	0	1	TRUE	1	0	0	1
ADIPOQ	Adiponectin	Q15848	0	1	1	1	FALSE	Not applicable	Not applicable	Not applicable	Not applicable
ADM	Pro-adrenomedullin	P35318	0	1	0	1	TRUE	0	1	0	1
ADRA2A	Alpha-2A adrenergic receptor	P08913	0	0	0	1	FALSE	Not applicable	Not applicable	Not applicable	Not applicable
AFAP1	Actin filament-associated protein 1	Q8N556	0	0	0	1	FALSE	Not applicable	Not applicable	Not applicable	Not applicable
AFM	Afamin	P43652	0	0	0	1	FALSE	Not applicable	Not applicable	Not applicable	Not applicable
AFP	Alpha-fetoprotein	P02771	0	0	0	1	TRUE	0	0	0	1
AGBL2	Cytosolic carboxypeptidase 2	Q5U5Z8	0	0	0	1	FALSE	Not applicable	Not applicable	Not applicable	Not applicable
AGER	Advanced glycosylation end product-specific receptor	Q15109	0	1	0	1	TRUE	0	1	0	1
AGR2	Anterior gradient protein 2 homolog	O95994	0	0	0	1	TRUE	0	0	0	1
AGR3	Anterior gradient protein 3	Q8TD06	0	0	0	1	TRUE	0	0	0	1
AGRN	Agrin	O00468	0	1	0	1	TRUE	0	1	0	1
AGRP	Agouti-related protein	O00253	0	0	1	1	TRUE	0	0	1	1
AGT	Angiotensinogen	P01019	1	1	0	1	FALSE	Not applicable	Not applicable	Not applicable	Not applicable
AGXT	Serine--pyruvate aminotransferase	P21549	0	1	0	1	TRUE	0	1	0	1
AHCY	Adenosylhomocysteinase	P23526	0	1	0	1	TRUE	0	1	0	1
AHNAK	Neuroblast differentiation-associated protein AHNAK	Q09666	0	0	0	1	FALSE	Not applicable	Not applicable	Not applicable	Not applicable
AHNAK2	Protein AHNAK2	Q8IVF2	0	0	0	1	FALSE	Not applicable	Not applicable	Not applicable	Not applicable
AHSA1	Activator of 90 kDa heat shock protein ATPase homolog 1	O95433	0	1	0	1	FALSE	Not applicable	Not applicable	Not applicable	Not applicable
AHSG	Alpha-2-HS-glycoprotein	P02765	0	1	0	1	FALSE	Not applicable	Not applicable	Not applicable	Not applicable
AHSP	Alpha-hemoglobin-stabilizing protein	Q9NZD4	0	0	1	1	TRUE	0	0	1	1
AIDA	Axin interactor, dorsalization-associated protein	Q96BJ3	0	0	0	1	FALSE	Not applicable	Not applicable	Not applicable	Not applicable
AIF1	Allograft inflammatory factor 1	P55008	0	1	0	1	TRUE	0	1	0	1
AIF1L	Allograft inflammatory factor 1-like	Q9BQI0	0	1	0	1	FALSE	Not applicable	Not applicable	Not applicable	Not applicable
AIFM1	Apoptosis-inducing factor 1, mitochondrial	O95831	0	0	0	1	TRUE	0	0	0	1
AK1	Adenylate kinase isoenzyme 1	P00568	0	0	0	1	TRUE	0	0	0	1
AK2	Adenylate kinase 2, mitochondrial	P54819	0	0	0	1	FALSE	Not applicable	Not applicable	Not applicable	Not applicable
AKAP12	A-kinase anchor protein 12	Q02952	0	0	1	1	FALSE	Not applicable	Not applicable	Not applicable	Not applicable
AKR1B1	Aldo-keto reductase family 1 member B1	P15121	0	1	0	1	TRUE	0	1	0	1
AKR1B10	Aldo-keto reductase family 1 member B10	O60218	0	1	1	1	FALSE	Not applicable	Not applicable	Not applicable	Not applicable
AKR1C4	Aldo-keto reductase family 1 member C4	P17516	0	0	0	1	TRUE	0	0	0	1
AKR7L	Aflatoxin B1 aldehyde reductase member 4	Q8NHP1	0	0	0	1	FALSE	Not applicable	Not applicable	Not applicable	Not applicable
AKT1S1	Proline-rich AKT1 substrate 1	Q96B36	0	0	0	1	TRUE	0	0	0	1
AKT2	RAC-beta serine/threonine-protein kinase	P31751	0	1	0	1	FALSE	Not applicable	Not applicable	Not applicable	Not applicable
AKT3	RAC-gamma serine/threonine-protein kinase	Q9Y243	0	1	0	1	TRUE	0	1	0	1
ALCAM	CD166 antigen	Q13740	1	0	1	1	TRUE	1	0	1	1
ALDH1A1	Retinal dehydrogenase 1	P00352	0	0	0	1	TRUE	0	0	0	1
ALDH2	Aldehyde dehydrogenase, mitochondrial	P05091	0	1	0	1	FALSE	Not applicable	Not applicable	Not applicable	Not applicable
ALDH3A1	Aldehyde dehydrogenase, dimeric NADP-preferring	P30838	0	0	0	1	TRUE	0	0	0	1
ALDH5A1	Succinate-semialdehyde dehydrogenase, mitochondrial	P51649	0	0	0	1	FALSE	Not applicable	Not applicable	Not applicable	Not applicable
ALMS1	Alstrom syndrome protein 1	Q8TCU4	0	1	1	1	FALSE	Not applicable	Not applicable	Not applicable	Not applicable
ALPI	Intestinal-type alkaline phosphatase	P09923	0	0	0	1	FALSE	Not applicable	Not applicable	Not applicable	Not applicable
ALPP	Alkaline phosphatase, placental type	P05187	0	0	0	1	TRUE	0	0	0	1
AMBN	Ameloblastin	Q9NP70	0	0	0	1	TRUE	0	0	0	1
AMBP	Protein AMBP	P02760	0	1	0	1	TRUE	0	1	0	1
AMDHD2	N-acetylglucosamine-6-phosphate deacetylase	Q9Y303	0	0	1	1	FALSE	Not applicable	Not applicable	Not applicable	Not applicable
AMFR	E3 ubiquitin-protein ligase AMFR	Q9UKV5	0	0	0	1	TRUE	0	0	0	1
AMIGO1	Amphoterin-induced protein 1	Q86WK6	0	0	0	1	FALSE	Not applicable	Not applicable	Not applicable	Not applicable
AMIGO2	Amphoterin-induced protein 2	Q86SJ2	1	0	1	1	TRUE	1	0	1	1
AMN	Protein amnionless	Q9BXJ7	0	0	0	1	TRUE	0	0	0	1
AMOT	Angiomotin	Q4VCS5	0	1	1	1	FALSE	Not applicable	Not applicable	Not applicable	Not applicable
AMOTL2	Angiomotin-like protein 2	Q9Y2J4	0	0	0	1	FALSE	Not applicable	Not applicable	Not applicable	Not applicable
AMPD3	AMP deaminase 3	Q01432	0	0	0	1	FALSE	Not applicable	Not applicable	Not applicable	Not applicable
AMY1A_AMY1B_AMY1C	Alpha-amylase 1A_Alpha-amylase 1B_Alpha-amylase 1C	P0DUB6_P0DTE7_P0DTE8	0	0	0	1	FALSE	Not applicable	Not applicable	Not applicable	Not applicable
AMY2A	Pancreatic alpha-amylase	P04746	0	0	0	1	TRUE	0	0	0	1
AMY2B	Alpha-amylase 2B	P19961	0	0	1	1	TRUE	0	0	1	1
ANG	Angiogenin	P03950	0	0	1	1	TRUE	0	0	1	1
ANGPT1	Angiopoietin-1	Q15389	1	1	0	1	TRUE	1	1	0	1
ANGPT2	Angiopoietin-2	O15123	1	1	0	1	TRUE	1	1	0	1
ANGPTL1	Angiopoietin-related protein 1	O95841	1	1	1	1	TRUE	1	1	1	1
ANGPTL2	Angiopoietin-related protein 2	Q9UKU9	0	1	0	1	TRUE	0	1	0	1
ANGPTL3	Angiopoietin-related protein 3	Q9Y5C1	0	1	1	1	TRUE	0	1	1	1
ANGPTL4	Angiopoietin-related protein 4	Q9BY76	0	1	0	1	TRUE	0	1	0	1
ANGPTL7	Angiopoietin-related protein 7	O43827	1	0	1	1	TRUE	1	0	1	1
ANK2	Ankyrin-2	Q01484	0	0	0	1	FALSE	Not applicable	Not applicable	Not applicable	Not applicable
ANKMY2	Ankyrin repeat and MYND domain-containing protein 2	Q8IV38	0	0	0	1	FALSE	Not applicable	Not applicable	Not applicable	Not applicable
ANKRA2	Ankyrin repeat family A protein 2	Q9H9E1	0	0	0	1	FALSE	Not applicable	Not applicable	Not applicable	Not applicable
ANKRD54	Ankyrin repeat domain-containing protein 54	Q6NXT1	0	0	0	1	TRUE	0	0	0	1
ANP32C	Acidic leucine-rich nuclear phosphoprotein 32 family member C	O43423	0	0	0	1	FALSE	Not applicable	Not applicable	Not applicable	Not applicable
ANPEP	Aminopeptidase N	P15144	0	1	0	1	TRUE	0	1	0	1
ANXA1	Annexin A1	P04083	0	0	0	1	FALSE	Not applicable	Not applicable	Not applicable	Not applicable
ANXA10	Annexin A10	Q9UJ72	0	0	0	1	TRUE	0	0	0	1
ANXA11	Annexin A11	P50995	0	1	0	1	TRUE	0	1	0	1
ANXA2	Annexin A2	P07355	0	1	0	1	FALSE	Not applicable	Not applicable	Not applicable	Not applicable
ANXA3	Annexin A3	P12429	0	0	0	1	TRUE	0	0	0	1
ANXA4	Annexin A4	P09525	0	0	0	1	TRUE	0	0	0	1
ANXA5	Annexin A5	P08758	0	1	0	1	TRUE	0	1	0	1
AOC1	Amiloride-sensitive amine oxidase [copper-containing]	P19801	0	0	1	1	TRUE	0	0	1	1
AOC3	Membrane primary amine oxidase	Q16853	1	1	0	1	TRUE	1	1	0	1
AP1G2	AP-1 complex subunit gamma-like 2	O75843	0	0	0	1	FALSE	Not applicable	Not applicable	Not applicable	Not applicable
AP2B1	AP-2 complex subunit beta	P63010	0	0	0	1	FALSE	Not applicable	Not applicable	Not applicable	Not applicable
AP3B1	AP-3 complex subunit beta-1	O00203	0	0	1	1	FALSE	Not applicable	Not applicable	Not applicable	Not applicable
AP3S2	AP-3 complex subunit sigma-2	P59780	0	0	1	1	FALSE	Not applicable	Not applicable	Not applicable	Not applicable
APBB1IP	Amyloid beta A4 precursor protein-binding family B member 1-interacting protein	Q7Z5R6	0	1	0	1	TRUE	0	1	0	1
APCS	Serum amyloid P-component	P02743	0	1	1	1	FALSE	Not applicable	Not applicable	Not applicable	Not applicable
APEX1	DNA-(apurinic or apyrimidinic site) endonuclease	P27695	0	1	0	1	TRUE	0	1	0	1
APLP1	Amyloid-like protein 1	P51693	0	0	0	1	TRUE	0	0	0	1
APOA1	Apolipoprotein A-I	P02647	0	1	1	1	FALSE	Not applicable	Not applicable	Not applicable	Not applicable
APOA2	Apolipoprotein A-II	P02652	0	1	0	1	FALSE	Not applicable	Not applicable	Not applicable	Not applicable
APOA4	Apolipoprotein A-IV	P06727	0	1	1	1	FALSE	Not applicable	Not applicable	Not applicable	Not applicable
APOB	Apolipoprotein B-100	P04114	1	1	0	1	FALSE	Not applicable	Not applicable	Not applicable	Not applicable
APOBR	Apolipoprotein B receptor	Q0VD83	0	1	1	1	FALSE	Not applicable	Not applicable	Not applicable	Not applicable
APOC1	Apolipoprotein C-I	P02654	0	1	1	1	FALSE	Not applicable	Not applicable	Not applicable	Not applicable
APOD	Apolipoprotein D	P05090	0	0	1	1	FALSE	Not applicable	Not applicable	Not applicable	Not applicable
APOE	Apolipoprotein E	P02649	0	1	0	1	FALSE	Not applicable	Not applicable	Not applicable	Not applicable
APOF	Apolipoprotein F	Q13790	0	0	1	1	FALSE	Not applicable	Not applicable	Not applicable	Not applicable
APOH	Beta-2-glycoprotein 1	P02749	0	1	0	1	TRUE	0	1	0	1
APOL1	Apolipoprotein L1	O14791	0	1	0	1	FALSE	Not applicable	Not applicable	Not applicable	Not applicable
APOM	Apolipoprotein M	O95445	0	1	0	1	TRUE	0	1	0	1
APP	Amyloid-beta precursor protein	P05067	0	1	0	1	TRUE	0	1	0	1
APPL2	DCC-interacting protein 13-beta	Q8NEU8	0	0	0	1	FALSE	Not applicable	Not applicable	Not applicable	Not applicable
APRT	Adenine phosphoribosyltransferase	P07741	0	1	0	1	TRUE	0	1	0	1
ARAF	Serine/threonine-protein kinase A-Raf	P10398	0	0	0	1	FALSE	Not applicable	Not applicable	Not applicable	Not applicable
AREG	Amphiregulin	P15514	0	0	0	1	TRUE	0	0	0	1
ARF6	ADP-ribosylation factor 6	P62330	0	0	0	1	FALSE	Not applicable	Not applicable	Not applicable	Not applicable
ARFIP1	Arfaptin-1	P53367	0	0	0	1	FALSE	Not applicable	Not applicable	Not applicable	Not applicable
ARG1	Arginase-1	P05089	0	1	0	1	TRUE	0	1	0	1
ARG2	Arginase-2, mitochondrial	P78540	0	1	0	1	FALSE	Not applicable	Not applicable	Not applicable	Not applicable
ARHGAP1	Rho GTPase-activating protein 1	Q07960	0	0	0	1	TRUE	0	0	0	1
ARHGAP25	Rho GTPase-activating protein 25	P42331	0	0	0	1	TRUE	0	0	0	1
ARHGAP30	Rho GTPase-activating protein 30	Q7Z6I6	0	0	0	1	FALSE	Not applicable	Not applicable	Not applicable	Not applicable
ARHGAP45	Rho GTPase-activating protein 45	Q92619	0	0	0	1	FALSE	Not applicable	Not applicable	Not applicable	Not applicable
ARHGAP5	Rho GTPase-activating protein 5	Q13017	0	0	0	1	FALSE	Not applicable	Not applicable	Not applicable	Not applicable
ARHGEF1	Rho guanine nucleotide exchange factor 1	Q92888	0	1	0	1	FALSE	Not applicable	Not applicable	Not applicable	Not applicable
ARHGEF10	Rho guanine nucleotide exchange factor 10	O15013	0	0	1	1	FALSE	Not applicable	Not applicable	Not applicable	Not applicable
ARHGEF12	Rho guanine nucleotide exchange factor 12	Q9NZN5	0	0	1	1	TRUE	0	0	1	1
ARHGEF5	Rho guanine nucleotide exchange factor 5	Q12774	0	0	0	1	FALSE	Not applicable	Not applicable	Not applicable	Not applicable
ARID3A	AT-rich interactive domain-containing protein 3A	Q99856	0	0	0	1	FALSE	Not applicable	Not applicable	Not applicable	Not applicable
ARID4B	AT-rich interactive domain-containing protein 4B	Q4LE39	0	0	0	1	TRUE	0	0	0	1
ARL13B	ADP-ribosylation factor-like protein 13B	Q3SXY8	0	0	0	1	FALSE	Not applicable	Not applicable	Not applicable	Not applicable
ARL2BP	ADP-ribosylation factor-like protein 2-binding protein	Q9Y2Y0	0	0	0	1	FALSE	Not applicable	Not applicable	Not applicable	Not applicable
ARMCX2	Armadillo repeat-containing X-linked protein 2	Q7L311	0	0	0	1	FALSE	Not applicable	Not applicable	Not applicable	Not applicable
ARNT	Aryl hydrocarbon receptor nuclear translocator	P27540	0	0	0	1	TRUE	0	0	0	1
ARNTL	Aryl hydrocarbon receptor nuclear translocator-like protein 1	O00327	0	0	0	1	FALSE	Not applicable	Not applicable	Not applicable	Not applicable
ARSA	Arylsulfatase A	P15289	0	0	0	1	TRUE	0	0	0	1
ARSB	Arylsulfatase B	P15848	0	0	0	1	TRUE	0	0	0	1
ART3	Ecto-ADP-ribosyltransferase 3	Q13508	0	0	0	1	TRUE	0	0	0	1
ART5	Ecto-ADP-ribosyltransferase 5	Q96L15	0	0	0	1	FALSE	Not applicable	Not applicable	Not applicable	Not applicable
ARTN	Artemin	Q5T4W7	0	0	0	1	TRUE	0	0	0	1
ASAH1	Acid ceramidase	Q13510	0	0	0	1	FALSE	Not applicable	Not applicable	Not applicable	Not applicable
ASAH2	Neutral ceramidase	Q9NR71	0	0	0	1	TRUE	0	0	0	1
ASGR1	Asialoglycoprotein receptor 1	P07306	0	0	0	1	TRUE	0	0	0	1
ASGR2	Asialoglycoprotein receptor 2	P07307	0	1	0	1	FALSE	Not applicable	Not applicable	Not applicable	Not applicable
ASPN	Asporin	Q9BXN1	1	0	1	1	FALSE	Not applicable	Not applicable	Not applicable	Not applicable
ASPSCR1	Tether containing UBX domain for GLUT4	Q9BZE9	0	0	0	1	FALSE	Not applicable	Not applicable	Not applicable	Not applicable
ASRGL1	Isoaspartyl peptidase/L-asparaginase	Q7L266	0	0	0	1	FALSE	Not applicable	Not applicable	Not applicable	Not applicable
ASS1	Argininosuccinate synthase	P00966	0	1	0	1	FALSE	Not applicable	Not applicable	Not applicable	Not applicable
ATF2	Cyclic AMP-dependent transcription factor ATF-2	P15336	0	0	0	1	TRUE	0	0	0	1
ATF4	Cyclic AMP-dependent transcription factor ATF-4	P18848	0	1	0	1	FALSE	Not applicable	Not applicable	Not applicable	Not applicable
ATG16L1	Autophagy-related protein 16-1	Q676U5	0	1	1	1	FALSE	Not applicable	Not applicable	Not applicable	Not applicable
ATG4A	Cysteine protease ATG4A	Q8WYN0	0	0	0	1	TRUE	0	0	0	1
ATOX1	Copper transport protein ATOX1	O00244	0	0	0	1	TRUE	0	0	0	1
ATP1B1	Sodium/potassium-transporting ATPase subunit beta-1	P05026	0	0	0	1	FALSE	Not applicable	Not applicable	Not applicable	Not applicable
ATP1B2	Sodium/potassium-transporting ATPase subunit beta-2	P14415	0	0	0	1	FALSE	Not applicable	Not applicable	Not applicable	Not applicable
ATP1B3	Sodium/potassium-transporting ATPase subunit beta-3	P54709	0	0	0	1	FALSE	Not applicable	Not applicable	Not applicable	Not applicable
ATP1B4	Protein ATP1B4	Q9UN42	0	0	0	1	FALSE	Not applicable	Not applicable	Not applicable	Not applicable
ATP2B4	Plasma membrane calcium-transporting ATPase 4	P23634	0	0	0	1	FALSE	Not applicable	Not applicable	Not applicable	Not applicable
ATP5F1D	ATP synthase subunit delta, mitochondrial	P30049	0	0	0	1	FALSE	Not applicable	Not applicable	Not applicable	Not applicable
ATP5IF1	ATPase inhibitor, mitochondrial	Q9UII2	0	0	0	1	TRUE	0	0	0	1
ATP5PO	ATP synthase subunit O, mitochondrial	P48047	0	0	0	1	TRUE	0	0	0	1
ATP6AP2	Renin receptor	O75787	0	0	0	1	TRUE	0	0	0	1
ATP6V1D	V-type proton ATPase subunit D	Q9Y5K8	0	0	0	1	TRUE	0	0	0	1
ATP6V1F	V-type proton ATPase subunit F	Q16864	0	0	0	1	TRUE	0	0	0	1
ATP6V1G1	V-type proton ATPase subunit G 1	O75348	0	0	0	1	FALSE	Not applicable	Not applicable	Not applicable	Not applicable
ATP6V1G2	V-type proton ATPase subunit G 2	O95670	0	0	0	1	FALSE	Not applicable	Not applicable	Not applicable	Not applicable
ATRAID	All-trans retinoic acid-induced differentiation factor	Q6UW56	0	0	0	1	FALSE	Not applicable	Not applicable	Not applicable	Not applicable
ATRN	Attractin, Isoform 2	O75882-2	0	0	0	1	FALSE	Not applicable	Not applicable	Not applicable	Not applicable
ATXN10	Ataxin-10	Q9UBB4	0	1	0	1	TRUE	0	1	0	1
ATXN2	Ataxin-2	Q99700	0	1	0	1	FALSE	Not applicable	Not applicable	Not applicable	Not applicable
ATXN2L	Ataxin-2-like protein	Q8WWM7	0	0	0	1	FALSE	Not applicable	Not applicable	Not applicable	Not applicable
ATXN3	Ataxin-3	P54252	0	0	0	1	FALSE	Not applicable	Not applicable	Not applicable	Not applicable
AXIN1	Axin-1	O15169	0	1	1	1	TRUE	0	1	1	1
AXL	Tyrosine-protein kinase receptor UFO	P30530	1	1	0	1	TRUE	1	1	0	1
AZI2	5-azacytidine-induced protein 2	Q9H6S1	0	0	0	1	FALSE	Not applicable	Not applicable	Not applicable	Not applicable
AZU1	Azurocidin	P20160	0	0	0	1	TRUE	0	0	0	1
B2M	Beta-2-microglobulin	P61769	0	0	0	1	FALSE	Not applicable	Not applicable	Not applicable	Not applicable
B3GAT3	Galactosylgalactosylxylosylprotein 3-beta-glucuronosyltransferase 3	O94766	0	0	0	1	FALSE	Not applicable	Not applicable	Not applicable	Not applicable
B3GNT7	UDP-GlcNAc:betaGal beta-1,3-N-acetylglucosaminyltransferase 7	Q8NFL0	0	0	0	1	FALSE	Not applicable	Not applicable	Not applicable	Not applicable
B4GALT1	Beta-1,4-galactosyltransferase 1	P15291	0	0	1	1	TRUE	0	0	1	1
B4GAT1	Beta-1,4-glucuronyltransferase 1	O43505	0	0	0	1	TRUE	0	0	0	1
BABAM1	BRISC and BRCA1-A complex member 1	Q9NWV8	0	0	0	1	FALSE	Not applicable	Not applicable	Not applicable	Not applicable
BACH1	Transcription regulator protein BACH1	O14867	0	0	0	1	TRUE	0	0	0	1
BAG3	BAG family molecular chaperone regulator 3	O95817	0	0	0	1	TRUE	0	0	0	1
BAG4	BAG family molecular chaperone regulator 4	O95429	0	0	0	1	FALSE	Not applicable	Not applicable	Not applicable	Not applicable
BAG6	Large proline-rich protein BAG6	P46379	0	0	0	1	TRUE	0	0	0	1
BAIAP2	Brain-specific angiogenesis inhibitor 1-associated protein 2	Q9UQB8	0	0	0	1	TRUE	0	0	0	1
BAMBI	BMP and activin membrane-bound inhibitor homolog	Q13145	0	0	0	1	TRUE	0	0	0	1
BANK1	B-cell scaffold protein with ankyrin repeats	Q8NDB2	0	0	0	1	TRUE	0	0	0	1
BAP18	Chromatin complexes subunit BAP18	Q8IXM2	0	0	1	1	FALSE	Not applicable	Not applicable	Not applicable	Not applicable
BATF	Basic leucine zipper transcriptional factor ATF-like	Q16520	0	0	0	1	FALSE	Not applicable	Not applicable	Not applicable	Not applicable
BAX	Apoptosis regulator BAX	Q07812	0	1	0	1	TRUE	0	1	0	1
BCAM	Basal cell adhesion molecule	P50895	1	0	0	1	TRUE	1	0	0	1
BCAN	Brevican core protein	Q96GW7	0	0	1	1	TRUE	0	0	1	1
BCAT1	Branched-chain-amino-acid aminotransferase, cytosolic	P54687	0	0	0	1	FALSE	Not applicable	Not applicable	Not applicable	Not applicable
BCAT2	Branched-chain-amino-acid aminotransferase, mitochondrial	O15382	0	0	0	1	FALSE	Not applicable	Not applicable	Not applicable	Not applicable
BCHE	Cholinesterase	P06276	0	0	0	1	FALSE	Not applicable	Not applicable	Not applicable	Not applicable
BCL2	Apoptosis regulator Bcl-2	P10415	0	1	0	1	FALSE	Not applicable	Not applicable	Not applicable	Not applicable
BCL2L1	Bcl-2-like protein 1	Q07817	0	1	0	1	FALSE	Not applicable	Not applicable	Not applicable	Not applicable
BCL2L11	Bcl-2-like protein 11, Isoform BimL	O43521-2	0	0	0	1	TRUE	0	0	0	1
BCL2L15	Bcl-2-like protein 15	Q5TBC7	0	0	0	1	FALSE	Not applicable	Not applicable	Not applicable	Not applicable
BCL7A	B-cell CLL/lymphoma 7 protein family member A	Q4VC05	0	1	0	1	FALSE	Not applicable	Not applicable	Not applicable	Not applicable
BCL7B	B-cell CLL/lymphoma 7 protein family member B	Q9BQE9	0	0	0	1	FALSE	Not applicable	Not applicable	Not applicable	Not applicable
BCR	Breakpoint cluster region protein	P11274	0	1	1	1	TRUE	0	1	1	1
BDNF	Brain-derived neurotrophic factor	P23560	1	1	0	1	FALSE	Not applicable	Not applicable	Not applicable	Not applicable
BECN1	Beclin-1	Q14457	0	1	0	1	FALSE	Not applicable	Not applicable	Not applicable	Not applicable
BEX3	Protein BEX3	Q00994	0	0	0	1	FALSE	Not applicable	Not applicable	Not applicable	Not applicable
BGLAP	Osteocalcin	P02818	0	0	0	1	FALSE	Not applicable	Not applicable	Not applicable	Not applicable
BGN	Biglycan	P21810	1	1	0	1	TRUE	1	1	0	1
BHLHE40	Class E basic helix-loop-helix protein 40	O14503	0	0	0	1	FALSE	Not applicable	Not applicable	Not applicable	Not applicable
BHMT2	S-methylmethionine--homocysteine S-methyltransferase BHMT2	Q9H2M3	0	0	0	1	FALSE	Not applicable	Not applicable	Not applicable	Not applicable
BID	BH3-interacting domain death agonist	P55957	0	1	1	1	TRUE	0	1	1	1
BIN2	Bridging integrator 2	Q9UBW5	0	0	0	1	TRUE	0	0	0	1
BIRC2	Baculoviral IAP repeat-containing protein 2	Q13490	0	0	0	1	TRUE	0	0	0	1
BLMH	Bleomycin hydrolase	Q13867	0	0	0	1	TRUE	0	0	0	1
BLNK	B-cell linker protein	Q8WV28	0	0	0	1	FALSE	Not applicable	Not applicable	Not applicable	Not applicable
BLOC1S2	Biogenesis of lysosome-related organelles complex 1 subunit 2	Q6QNY1	0	0	0	1	FALSE	Not applicable	Not applicable	Not applicable	Not applicable
BLOC1S3	Biogenesis of lysosome-related organelles complex 1 subunit 3	Q6QNY0	0	0	0	1	FALSE	Not applicable	Not applicable	Not applicable	Not applicable
BLVRB	Flavin reductase	P30043	0	0	0	1	TRUE	0	0	0	1
BMP10	Bone morphogenetic protein 10	O95393	0	0	0	1	FALSE	Not applicable	Not applicable	Not applicable	Not applicable
BMP4	Bone morphogenetic protein 4	P12644	0	1	1	1	TRUE	0	1	1	1
BMP6	Bone morphogenetic protein 6	P22004	0	1	0	1	TRUE	0	1	0	1
BMPER	BMP-binding endothelial regulator protein	Q8N8U9	0	0	0	1	FALSE	Not applicable	Not applicable	Not applicable	Not applicable
BNIP2	BCL2/adenovirus E1B 19 kDa protein-interacting protein 2	Q12982	0	0	0	1	FALSE	Not applicable	Not applicable	Not applicable	Not applicable
BNIP3L	BCL2/adenovirus E1B 19 kDa protein-interacting protein 3-like	O60238	0	0	0	1	FALSE	Not applicable	Not applicable	Not applicable	Not applicable
BOC	Brother of CDO	Q9BWV1	0	0	0	1	TRUE	0	0	0	1
BOLA1	BolA-like protein 1	Q9Y3E2	0	0	0	1	FALSE	Not applicable	Not applicable	Not applicable	Not applicable
BOLA2_BOLA2B	BolA-like protein 2	Q9H3K6	0	0	0	1	FALSE	Not applicable	Not applicable	Not applicable	Not applicable
BPIFA2	BPI fold-containing family A member 2	Q96DR5	0	0	0	1	FALSE	Not applicable	Not applicable	Not applicable	Not applicable
BPIFB1	BPI fold-containing family B member 1	Q8TDL5	0	0	0	1	TRUE	0	0	0	1
BPIFB2	BPI fold-containing family B member 2	Q8N4F0	0	0	0	1	FALSE	Not applicable	Not applicable	Not applicable	Not applicable
BRAP	BRCA1-associated protein	Q7Z569	0	0	0	1	FALSE	Not applicable	Not applicable	Not applicable	Not applicable
BRD1	Bromodomain-containing protein 1	O95696	0	0	0	1	FALSE	Not applicable	Not applicable	Not applicable	Not applicable
BRD2	Bromodomain-containing protein 2	P25440	0	0	0	1	FALSE	Not applicable	Not applicable	Not applicable	Not applicable
BRD3	Bromodomain-containing protein 3	Q15059	0	0	0	1	FALSE	Not applicable	Not applicable	Not applicable	Not applicable
BRDT	Bromodomain testis-specific protein	Q58F21	0	0	0	1	FALSE	Not applicable	Not applicable	Not applicable	Not applicable
BRK1	Protein BRICK1	Q8WUW1	0	0	0	1	TRUE	0	0	0	1
BRME1	Break repair meiotic recombinase recruitment factor 1	Q0VDD7	0	0	0	1	FALSE	Not applicable	Not applicable	Not applicable	Not applicable
BRSK2	Serine/threonine-protein kinase BRSK2	Q8IWQ3	0	0	0	1	FALSE	Not applicable	Not applicable	Not applicable	Not applicable
BSG	Basigin	P35613	0	1	0	1	TRUE	0	1	0	1
BSND	Barttin	Q8WZ55	0	0	0	1	FALSE	Not applicable	Not applicable	Not applicable	Not applicable
BST1	ADP-ribosyl cyclase/cyclic ADP-ribose hydrolase 2	Q10588	0	0	0	1	TRUE	0	0	0	1
BST2	Bone marrow stromal antigen 2	Q10589	0	0	0	1	TRUE	0	0	0	1
BTC	Probetacellulin	P35070	1	1	0	1	TRUE	1	1	0	1
BTD	Biotinidase	P43251	0	0	0	1	FALSE	Not applicable	Not applicable	Not applicable	Not applicable
BTLA	B- and T-lymphocyte attenuator	Q7Z6A9	0	0	0	1	FALSE	Not applicable	Not applicable	Not applicable	Not applicable
BTN1A1	Butyrophilin subfamily 1 member A1	Q13410	0	0	0	1	FALSE	Not applicable	Not applicable	Not applicable	Not applicable
BTN2A1	Butyrophilin subfamily 2 member A1	Q7KYR7	0	0	0	1	TRUE	0	0	0	1
BTN3A2	Butyrophilin subfamily 3 member A2	P78410	0	0	0	1	TRUE	0	0	0	1
BTNL10	Butyrophilin-like protein 10	A8MVZ5	0	0	0	1	FALSE	Not applicable	Not applicable	Not applicable	Not applicable
C19orf12	Protein C19orf12	Q9NSK7	0	0	0	1	TRUE	0	0	0	1
C1GALT1C1	C1GALT1-specific chaperone 1	Q96EU7	0	0	0	1	FALSE	Not applicable	Not applicable	Not applicable	Not applicable
C1QA	Complement C1q subcomponent subunit A	P02745	0	0	0	1	TRUE	0	0	0	1
C1QBP	Complement component 1 Q subcomponent-binding protein, mitochondrial	Q07021	0	1	0	1	FALSE	Not applicable	Not applicable	Not applicable	Not applicable
C1QL2	Complement C1q-like protein 2	Q7Z5L3	0	0	0	1	FALSE	Not applicable	Not applicable	Not applicable	Not applicable
C1QTNF1	Complement C1q tumor necrosis factor-related protein 1	Q9BXJ1	1	1	0	1	TRUE	1	1	0	1
C1QTNF5	Complement C1q tumor necrosis factor-related protein 5	Q9BXJ0	0	0	0	1	FALSE	Not applicable	Not applicable	Not applicable	Not applicable
C1QTNF6	Complement C1q tumor necrosis factor-related protein 6	Q9BXI9	0	0	0	1	FALSE	Not applicable	Not applicable	Not applicable	Not applicable
C1QTNF9	Complement C1q and tumor necrosis factor-related protein 9A	P0C862	0	0	0	1	FALSE	Not applicable	Not applicable	Not applicable	Not applicable
C1R	Complement C1r subcomponent	P00736	1	0	0	1	FALSE	Not applicable	Not applicable	Not applicable	Not applicable
C1RL	Complement C1r subcomponent-like protein	Q9NZP8	0	1	1	1	FALSE	Not applicable	Not applicable	Not applicable	Not applicable
C1S	Complement C1s subcomponent	P09871	0	0	1	1	FALSE	Not applicable	Not applicable	Not applicable	Not applicable
C2	Complement C2	P06681	0	0	0	1	TRUE	0	0	0	1
C2CD2L	Phospholipid transfer protein C2CD2L	O14523	0	0	0	1	TRUE	0	0	0	1
C2orf69	UPF0565 protein C2orf69	Q8N8R5	0	0	0	1	FALSE	Not applicable	Not applicable	Not applicable	Not applicable
C3	Complement C3	P01024	0	1	0	1	FALSE	Not applicable	Not applicable	Not applicable	Not applicable
C4BPB	C4b-binding protein beta chain	P20851	0	0	0	1	TRUE	0	0	0	1
C5	Complement C5	P01031	0	0	0	1	FALSE	Not applicable	Not applicable	Not applicable	Not applicable
C7	Complement component C7	P10643	1	0	0	1	FALSE	Not applicable	Not applicable	Not applicable	Not applicable
C7orf50	Uncharacterized protein C7orf50	Q9BRJ6	0	0	0	1	FALSE	Not applicable	Not applicable	Not applicable	Not applicable
C8B	Complement component C8 beta chain	P07358	0	0	0	1	FALSE	Not applicable	Not applicable	Not applicable	Not applicable
C9	Complement component C9	P02748	0	0	0	1	FALSE	Not applicable	Not applicable	Not applicable	Not applicable
C9orf40	Uncharacterized protein C9orf40	Q8IXQ3	0	0	0	1	FALSE	Not applicable	Not applicable	Not applicable	Not applicable
CA1	Carbonic anhydrase 1	P00915	0	0	0	1	TRUE	0	0	0	1
CA11	Carbonic anhydrase-related protein 11	O75493	0	0	0	1	TRUE	0	0	0	1
CA12	Carbonic anhydrase 12	O43570	0	0	1	1	TRUE	0	0	1	1
CA13	Carbonic anhydrase 13	Q8N1Q1	0	0	0	1	TRUE	0	0	0	1
CA14	Carbonic anhydrase 14	Q9ULX7	0	0	1	1	TRUE	0	0	1	1
CA2	Carbonic anhydrase 2	P00918	0	0	0	1	TRUE	0	0	0	1
CA3	Carbonic anhydrase 3	P07451	0	0	0	1	TRUE	0	0	0	1
CA4	Carbonic anhydrase 4	P22748	0	0	0	1	TRUE	0	0	0	1
CA5A	Carbonic anhydrase 5A, mitochondrial	P35218	0	0	0	1	TRUE	0	0	0	1
CA6	Carbonic anhydrase 6	P23280	0	0	0	1	TRUE	0	0	0	1
CA7	Carbonic anhydrase 7	P43166	0	0	0	1	FALSE	Not applicable	Not applicable	Not applicable	Not applicable
CA8	Carbonic anhydrase-related protein	P35219	0	0	1	1	FALSE	Not applicable	Not applicable	Not applicable	Not applicable
CA9	Carbonic anhydrase 9	Q16790	0	0	0	1	TRUE	0	0	0	1
CABP2	Calcium-binding protein 2	Q9NPB3	0	0	0	1	FALSE	Not applicable	Not applicable	Not applicable	Not applicable
CACNA1C	Voltage-dependent L-type calcium channel subunit alpha-1C	Q13936	1	1	0	1	FALSE	Not applicable	Not applicable	Not applicable	Not applicable
CACNA1H	Voltage-dependent T-type calcium channel subunit alpha-1H	O95180	0	0	0	1	FALSE	Not applicable	Not applicable	Not applicable	Not applicable
CACNB1	Voltage-dependent L-type calcium channel subunit beta-1	Q02641	0	0	0	1	FALSE	Not applicable	Not applicable	Not applicable	Not applicable
CACNB3	Voltage-dependent L-type calcium channel subunit beta-3	P54284	0	0	0	1	FALSE	Not applicable	Not applicable	Not applicable	Not applicable
CACYBP	Calcyclin-binding protein	Q9HB71	0	0	0	1	FALSE	Not applicable	Not applicable	Not applicable	Not applicable
CADPS	Calcium-dependent secretion activator 1	Q9ULU8	0	0	0	1	FALSE	Not applicable	Not applicable	Not applicable	Not applicable
CALB1	Calbindin	P05937	0	0	0	1	TRUE	0	0	0	1
CALB2	Calretinin	P22676	0	0	0	1	TRUE	0	0	0	1
CALCA	Calcitonin	P01258	0	0	0	1	TRUE	0	0	0	1
CALCB	Calcitonin gene-related peptide 2	P10092	0	0	0	1	FALSE	Not applicable	Not applicable	Not applicable	Not applicable
CALCOCO1	Calcium-binding and coiled-coil domain-containing protein 1	Q9P1Z2	0	0	1	1	TRUE	0	0	1	1
CALCOCO2	Calcium-binding and coiled-coil domain-containing protein 2	Q13137	0	0	1	1	FALSE	Not applicable	Not applicable	Not applicable	Not applicable
CALY	Neuron-specific vesicular protein calcyon	Q9NYX4	0	0	0	1	FALSE	Not applicable	Not applicable	Not applicable	Not applicable
CAMKK1	Calcium/calmodulin-dependent protein kinase kinase 1	Q8N5S9	0	0	0	1	TRUE	0	0	0	1
CAMLG	Guided entry of tail-anchored proteins factor CAMLG	P49069	0	0	0	1	FALSE	Not applicable	Not applicable	Not applicable	Not applicable
CAMSAP1	Calmodulin-regulated spectrin-associated protein 1	Q5T5Y3	0	0	1	1	FALSE	Not applicable	Not applicable	Not applicable	Not applicable
CANT1	Soluble calcium-activated nucleotidase 1	Q8WVQ1	0	0	0	1	TRUE	0	0	0	1
CAPG	Macrophage-capping protein	P40121	0	1	0	1	TRUE	0	1	0	1
CAPN3	Calpain-3	P20807	0	0	0	1	FALSE	Not applicable	Not applicable	Not applicable	Not applicable
CAPS	Calcyphosin	Q13938	0	0	0	1	FALSE	Not applicable	Not applicable	Not applicable	Not applicable
CARHSP1	Calcium-regulated heat-stable protein 1	Q9Y2V2	0	1	0	1	TRUE	0	1	0	1
CASC3	Protein CASC3	O15234	0	0	0	1	FALSE	Not applicable	Not applicable	Not applicable	Not applicable
CASP1	Caspase-1	P29466	0	1	0	1	TRUE	0	1	0	1
CASP10	Caspase-10	Q92851	0	0	0	1	TRUE	0	0	0	1
CASP2	Caspase-2	P42575	0	0	0	1	TRUE	0	0	0	1
CASP3	Caspase-3	P42574	0	1	0	1	TRUE	0	1	0	1
CASP4	Caspase-4	P49662	0	0	0	1	FALSE	Not applicable	Not applicable	Not applicable	Not applicable
CASP7	Caspase-7	P55210	0	1	0	1	FALSE	Not applicable	Not applicable	Not applicable	Not applicable
CASP8	Caspase-8	Q14790	0	1	0	1	TRUE	0	1	0	1
CASP9	Caspase-9	P55211	0	1	0	1	FALSE	Not applicable	Not applicable	Not applicable	Not applicable
CASQ2	Calsequestrin-2	O14958	1	0	0	1	FALSE	Not applicable	Not applicable	Not applicable	Not applicable
CAT	Catalase	P04040	0	1	0	1	FALSE	Not applicable	Not applicable	Not applicable	Not applicable
CBLIF	Cobalamin binding intrinsic factor	P27352	0	0	0	1	TRUE	0	0	0	1
CBLN1	Cerebellin-1	P23435	0	0	0	1	FALSE	Not applicable	Not applicable	Not applicable	Not applicable
CBLN4	Cerebellin-4	Q9NTU7	0	0	0	1	TRUE	0	0	0	1
CBS	Cystathionine beta-synthase	P35520	0	1	0	1	FALSE	Not applicable	Not applicable	Not applicable	Not applicable
CBX2	Chromobox protein homolog 2	Q14781	0	0	0	1	FALSE	Not applicable	Not applicable	Not applicable	Not applicable
CC2D1A	Coiled-coil and C2 domain-containing protein 1A	Q6P1N0	0	0	1	1	TRUE	0	0	1	1
CCAR2	Cell cycle and apoptosis regulator protein 2	Q8N163	0	1	0	1	FALSE	Not applicable	Not applicable	Not applicable	Not applicable
CCDC134	Coiled-coil domain-containing protein 134	Q9H6E4	0	0	0	1	FALSE	Not applicable	Not applicable	Not applicable	Not applicable
CCDC28A	Coiled-coil domain-containing protein 28A	Q8IWP9	0	0	0	1	FALSE	Not applicable	Not applicable	Not applicable	Not applicable
CCDC50	Coiled-coil domain-containing protein 50	Q8IVM0	0	0	0	1	FALSE	Not applicable	Not applicable	Not applicable	Not applicable
CCDC80	Coiled-coil domain-containing protein 80	Q76M96	0	0	0	1	TRUE	0	0	0	1
CCER2	Coiled-coil domain-containing glutamate-rich protein 2	I3L3R5	0	0	0	1	FALSE	Not applicable	Not applicable	Not applicable	Not applicable
CCL11	Eotaxin	P51671	0	1	0	1	TRUE	0	1	0	1
CCL13	C-C motif chemokine 13	Q99616	1	0	0	1	TRUE	1	0	0	1
CCL14	C-C motif chemokine 14	Q16627	0	0	0	1	TRUE	0	0	0	1
CCL15	C-C motif chemokine 15	Q16663	0	1	0	1	TRUE	0	1	0	1
CCL16	C-C motif chemokine 16	O15467	0	0	1	1	TRUE	0	0	1	1
CCL17	C-C motif chemokine 17	Q92583	0	1	1	1	TRUE	0	1	1	1
CCL18	C-C motif chemokine 18	P55774	0	1	0	1	TRUE	0	1	0	1
CCL19	C-C motif chemokine 19	Q99731	1	1	0	1	TRUE	1	1	0	1
CCL2	C-C motif chemokine 2	P13500	0	1	0	1	TRUE	0	1	0	1
CCL20	C-C motif chemokine 20	P78556	0	1	1	1	TRUE	0	1	1	1
CCL21	C-C motif chemokine 21	O00585	0	1	0	1	TRUE	0	1	0	1
CCL22	C-C motif chemokine 22	O00626	0	1	1	1	TRUE	0	1	1	1
CCL23	C-C motif chemokine 23	P55773	0	1	1	1	TRUE	0	1	1	1
CCL24	C-C motif chemokine 24	O00175	0	0	0	1	TRUE	0	0	0	1
CCL25	C-C motif chemokine 25	O15444	0	1	0	1	TRUE	0	1	0	1
CCL26	C-C motif chemokine 26	Q9Y258	0	0	1	1	TRUE	0	0	1	1
CCL27	C-C motif chemokine 27	Q9Y4X3	0	0	0	1	TRUE	0	0	0	1
CCL28	C-C motif chemokine 28	Q9NRJ3	0	0	0	1	TRUE	0	0	0	1
CCL3	C-C motif chemokine 3	P10147	0	1	0	1	TRUE	0	1	0	1
CCL4	C-C motif chemokine 4	P13236	0	1	0	1	TRUE	0	1	0	1
CCL5	C-C motif chemokine 5	P13501	0	1	0	1	TRUE	0	1	0	1
CCL7	C-C motif chemokine 7	P80098	0	1	1	1	TRUE	0	1	1	1
CCL8	C-C motif chemokine 8	P80075	0	1	0	1	TRUE	0	1	0	1
CCN1	CCN family member 1	O00622	0	0	1	1	TRUE	0	0	1	1
CCN2	CCN family member 2	P29279	0	1	0	1	TRUE	0	1	0	1
CCN3	CCN family member 3	P48745	0	0	1	1	TRUE	0	0	1	1
CCN4	CCN family member 4	O95388	0	0	0	1	TRUE	0	0	0	1
CCN5	CCN family member 5	O76076	0	0	0	1	TRUE	0	0	0	1
CCND2	G1/S-specific cyclin-D2	P30279	0	0	0	1	FALSE	Not applicable	Not applicable	Not applicable	Not applicable
CCNE1	G1/S-specific cyclin-E1	P24864	0	0	0	1	FALSE	Not applicable	Not applicable	Not applicable	Not applicable
CCS	Copper chaperone for superoxide dismutase	O14618	0	0	0	1	TRUE	0	0	0	1
CCT5	T-complex protein 1 subunit epsilon	P48643	0	0	0	1	TRUE	0	0	0	1
CD101	Immunoglobulin superfamily member 2	Q93033	0	0	0	1	FALSE	Not applicable	Not applicable	Not applicable	Not applicable
CD109	CD109 antigen	Q6YHK3	0	1	1	1	TRUE	0	1	1	1
CD14	Monocyte differentiation antigen CD14	P08571	0	1	0	1	TRUE	0	1	0	1
CD160	CD160 antigen	O95971	0	0	0	1	TRUE	0	0	0	1
CD163	Scavenger receptor cysteine-rich type 1 protein M130	Q86VB7	0	1	0	1	TRUE	0	1	0	1
CD164	Sialomucin core protein 24	Q04900	0	0	0	1	TRUE	0	0	0	1
CD164L2	CD164 sialomucin-like 2 protein	Q6UWJ8	0	0	0	1	FALSE	Not applicable	Not applicable	Not applicable	Not applicable
CD177	CD177 antigen	Q8N6Q3	0	1	0	1	TRUE	0	1	0	1
CD1C	T-cell surface glycoprotein CD1c	P29017	0	0	0	1	TRUE	0	0	0	1
CD2	T-cell surface antigen CD2	P06729	0	0	1	1	FALSE	Not applicable	Not applicable	Not applicable	Not applicable
CD200	OX-2 membrane glycoprotein	P41217	0	1	1	1	TRUE	0	1	1	1
CD200R1	Cell surface glycoprotein CD200 receptor 1	Q8TD46	0	0	0	1	TRUE	0	0	0	1
CD207	C-type lectin domain family 4 member K	Q9UJ71	0	0	0	1	TRUE	0	0	0	1
CD209	CD209 antigen	Q9NNX6	0	0	0	1	TRUE	0	0	0	1
CD22	B-cell receptor CD22	P20273	0	0	0	1	TRUE	0	0	0	1
CD226	CD226 antigen	Q15762	0	0	0	1	FALSE	Not applicable	Not applicable	Not applicable	Not applicable
CD244	Natural killer cell receptor 2B4	Q9BZW8	0	0	0	1	TRUE	0	0	0	1
CD248	Endosialin	Q9HCU0	0	1	1	1	FALSE	Not applicable	Not applicable	Not applicable	Not applicable
CD27	CD27 antigen	P26842	0	0	0	1	TRUE	0	0	0	1
CD274	Programmed cell death 1 ligand 1	Q9NZQ7	0	1	0	1	TRUE	0	1	0	1
CD276	CD276 antigen	Q5ZPR3	0	0	0	1	TRUE	0	0	0	1
CD28	T-cell-specific surface glycoprotein CD28	P10747	1	1	0	1	TRUE	1	1	0	1
CD2AP	CD2-associated protein	Q9Y5K6	0	0	0	1	TRUE	0	0	0	1
CD300A	CMRF35-like molecule 8	Q9UGN4	0	0	0	1	FALSE	Not applicable	Not applicable	Not applicable	Not applicable
CD300C	CMRF35-like molecule 6	Q08708	0	0	0	1	TRUE	0	0	0	1
CD300E	CMRF35-like molecule 2	Q496F6	0	0	0	1	TRUE	0	0	0	1
CD300LF	CMRF35-like molecule 1	Q8TDQ1	0	1	0	1	TRUE	0	1	0	1
CD300LG	CMRF35-like molecule 9	Q6UXG3	0	0	1	1	TRUE	0	0	1	1
CD302	CD302 antigen	Q8IX05	1	0	0	1	TRUE	1	0	0	1
CD33	Myeloid cell surface antigen CD33	P20138	0	0	0	1	TRUE	0	0	0	1
CD34	Hematopoietic progenitor cell antigen CD34	P28906	0	1	1	1	TRUE	0	1	1	1
CD36	Platelet glycoprotein 4	P16671	0	1	0	1	FALSE	Not applicable	Not applicable	Not applicable	Not applicable
CD38	ADP-ribosyl cyclase/cyclic ADP-ribose hydrolase 1	P28907	0	0	1	1	TRUE	0	0	1	1
CD3D	T-cell surface glycoprotein CD3 delta chain	P04234	0	1	0	1	FALSE	Not applicable	Not applicable	Not applicable	Not applicable
CD3E	T-cell surface glycoprotein CD3 epsilon chain	P07766	0	1	1	1	FALSE	Not applicable	Not applicable	Not applicable	Not applicable
CD3G	T-cell surface glycoprotein CD3 gamma chain	P09693	0	1	0	1	FALSE	Not applicable	Not applicable	Not applicable	Not applicable
CD4	T-cell surface glycoprotein CD4	P01730	0	1	1	1	TRUE	0	1	1	1
CD40	Tumor necrosis factor receptor superfamily member 5	P25942	0	1	0	1	TRUE	0	1	0	1
CD40LG	CD40 ligand	P29965	0	1	0	1	TRUE	0	1	0	1
CD46	Membrane cofactor protein	P15529	0	1	0	1	TRUE	0	1	0	1
CD48	CD48 antigen	P09326	0	0	0	1	TRUE	0	0	0	1
CD5	T-cell surface glycoprotein CD5	P06127	0	0	0	1	TRUE	0	0	0	1
CD55	Complement decay-accelerating factor	P08174	0	0	0	1	TRUE	0	0	0	1
CD58	Lymphocyte function-associated antigen 3	P19256	0	0	1	1	TRUE	0	0	1	1
CD59	CD59 glycoprotein	P13987	0	1	0	1	TRUE	0	1	0	1
CD5L	CD5 antigen-like	O43866	0	1	0	1	FALSE	Not applicable	Not applicable	Not applicable	Not applicable
CD6	T-cell differentiation antigen CD6	P30203	0	0	0	1	TRUE	0	0	0	1
CD63	CD63 antigen	P08962	0	0	1	1	TRUE	0	0	1	1
CD69	Early activation antigen CD69	Q07108	0	0	0	1	TRUE	0	0	0	1
CD7	T-cell antigen CD7	P09564	0	0	0	1	FALSE	Not applicable	Not applicable	Not applicable	Not applicable
CD70	CD70 antigen	P32970	0	0	0	1	TRUE	0	0	0	1
CD72	B-cell differentiation antigen CD72	P21854	0	0	0	1	FALSE	Not applicable	Not applicable	Not applicable	Not applicable
CD74	HLA class II histocompatibility antigen gamma chain	P04233	0	1	0	1	TRUE	0	1	0	1
CD79B	B-cell antigen receptor complex-associated protein beta chain	P40259	0	0	0	1	TRUE	0	0	0	1
CD80	T-lymphocyte activation antigen CD80	P33681	0	1	0	1	FALSE	Not applicable	Not applicable	Not applicable	Not applicable
CD82	CD82 antigen	P27701	0	1	0	1	FALSE	Not applicable	Not applicable	Not applicable	Not applicable
CD83	CD83 antigen	Q01151	0	0	0	1	TRUE	0	0	0	1
CD84	SLAM family member 5	Q9UIB8	0	0	0	1	TRUE	0	0	0	1
CD86	T-lymphocyte activation antigen CD86	P42081	0	1	0	1	FALSE	Not applicable	Not applicable	Not applicable	Not applicable
CD8A	T-cell surface glycoprotein CD8 alpha chain	P01732	0	0	0	1	TRUE	0	0	0	1
CD93	Complement component C1q receptor	Q9NPY3	0	0	1	1	TRUE	0	0	1	1
CD99	CD99 antigen	P14209	0	0	0	1	TRUE	0	0	0	1
CD99L2	CD99 antigen-like protein 2	Q8TCZ2	0	0	0	1	TRUE	0	0	0	1
CDA	Cytidine deaminase	P32320	0	0	0	1	FALSE	Not applicable	Not applicable	Not applicable	Not applicable
CDAN1	Codanin-1	Q8IWY9	0	0	0	1	FALSE	Not applicable	Not applicable	Not applicable	Not applicable
CDC123	Cell division cycle protein 123 homolog	O75794	0	0	0	1	FALSE	Not applicable	Not applicable	Not applicable	Not applicable
CDC25A	M-phase inducer phosphatase 1	P30304	0	0	0	1	FALSE	Not applicable	Not applicable	Not applicable	Not applicable
CDC26	Anaphase-promoting complex subunit CDC26	Q8NHZ8	0	0	0	1	FALSE	Not applicable	Not applicable	Not applicable	Not applicable
CDC27	Cell division cycle protein 27 homolog	P30260	0	1	1	1	TRUE	0	1	1	1
CDC37	Hsp90 co-chaperone Cdc37	Q16543	0	0	0	1	TRUE	0	0	0	1
CDC42BPB	Serine/threonine-protein kinase MRCK beta	Q9Y5S2	0	0	1	1	FALSE	Not applicable	Not applicable	Not applicable	Not applicable
CDCP1	CUB domain-containing protein 1	Q9H5V8	0	0	0	1	TRUE	0	0	0	1
CDH1	Cadherin-1	P12830	0	1	0	1	TRUE	0	1	0	1
CDH15	Cadherin-15	P55291	0	0	0	1	TRUE	0	0	0	1
CDH17	Cadherin-17	Q12864	1	0	0	1	TRUE	1	0	0	1
CDH2	Cadherin-2	P19022	1	1	0	1	TRUE	1	1	0	1
CDH22	Cadherin-22	Q9UJ99	0	0	0	1	FALSE	Not applicable	Not applicable	Not applicable	Not applicable
CDH23	Cadherin-23	Q9H251	0	1	0	1	FALSE	Not applicable	Not applicable	Not applicable	Not applicable
CDH3	Cadherin-3	P22223	0	0	1	1	TRUE	0	0	1	1
CDH4	Cadherin-4	P55283	0	0	0	1	FALSE	Not applicable	Not applicable	Not applicable	Not applicable
CDH5	Cadherin-5	P33151	0	1	1	1	TRUE	0	1	1	1
CDH6	Cadherin-6	P55285	1	0	1	1	TRUE	1	0	1	1
CDHR1	Cadherin-related family member 1	Q96JP9	0	0	0	1	TRUE	0	0	0	1
CDHR2	Cadherin-related family member 2	Q9BYE9	0	0	0	1	TRUE	0	0	0	1
CDHR5	Cadherin-related family member 5	Q9HBB8	0	0	0	1	TRUE	0	0	0	1
CDK1	Cyclin-dependent kinase 1	P06493	0	0	0	1	FALSE	Not applicable	Not applicable	Not applicable	Not applicable
CDK5RAP3	CDK5 regulatory subunit-associated protein 3	Q96JB5	0	0	0	1	FALSE	Not applicable	Not applicable	Not applicable	Not applicable
CDKL5	Cyclin-dependent kinase-like 5	O76039	0	0	0	1	FALSE	Not applicable	Not applicable	Not applicable	Not applicable
CDKN1A	Cyclin-dependent kinase inhibitor 1	P38936	0	1	1	1	TRUE	0	1	1	1
CDKN2D	Cyclin-dependent kinase 4 inhibitor D	P55273	0	0	0	1	TRUE	0	0	0	1
CDNF	Cerebral dopamine neurotrophic factor	Q49AH0	0	0	0	1	TRUE	0	0	0	1
CDON	Cell adhesion molecule-related/down-regulated by oncogenes	Q4KMG0	0	1	0	1	TRUE	0	1	0	1
CDSN	Corneodesmosin	Q15517	0	0	0	1	TRUE	0	0	0	1
CEACAM1	Carcinoembryonic antigen-related cell adhesion molecule 1	P13688	0	0	0	1	TRUE	0	0	0	1
CEACAM16	Carcinoembryonic antigen-related cell adhesion molecule 16	Q2WEN9	0	0	0	1	FALSE	Not applicable	Not applicable	Not applicable	Not applicable
CEACAM18	Carcinoembryonic antigen-related cell adhesion molecule 18	A8MTB9	0	0	0	1	FALSE	Not applicable	Not applicable	Not applicable	Not applicable
CEACAM19	Carcinoembryonic antigen-related cell adhesion molecule 19	Q7Z692	0	0	0	1	FALSE	Not applicable	Not applicable	Not applicable	Not applicable
CEACAM20	Carcinoembryonic antigen-related cell adhesion molecule 20	Q6UY09	0	0	0	1	FALSE	Not applicable	Not applicable	Not applicable	Not applicable
CEACAM21	Carcinoembryonic antigen-related cell adhesion molecule 21	Q3KPI0	0	0	0	1	TRUE	0	0	0	1
CEACAM3	Carcinoembryonic antigen-related cell adhesion molecule 3	P40198	0	0	0	1	TRUE	0	0	0	1
CEACAM5	Carcinoembryonic antigen-related cell adhesion molecule 5	P06731	0	0	0	1	TRUE	0	0	0	1
CEACAM6	Carcinoembryonic antigen-related cell adhesion molecule 6	P40199	0	0	0	1	FALSE	Not applicable	Not applicable	Not applicable	Not applicable
CEACAM8	Carcinoembryonic antigen-related cell adhesion molecule 8	P31997	0	0	0	1	TRUE	0	0	0	1
CEBPA	CCAAT/enhancer-binding protein alpha	P49715	0	0	0	1	FALSE	Not applicable	Not applicable	Not applicable	Not applicable
CEBPB	CCAAT/enhancer-binding protein beta	P17676	0	0	0	1	TRUE	0	0	0	1
CELA2A	Chymotrypsin-like elastase family member 2A	P08217	0	1	0	1	FALSE	Not applicable	Not applicable	Not applicable	Not applicable
CELA3A	Chymotrypsin-like elastase family member 3A	P09093	0	0	0	1	TRUE	0	0	0	1
CELSR2	Cadherin EGF LAG seven-pass G-type receptor 2	Q9HCU4	0	1	1	1	FALSE	Not applicable	Not applicable	Not applicable	Not applicable
CEMIP2	Cell surface hyaluronidase	Q9UHN6	0	0	0	1	FALSE	Not applicable	Not applicable	Not applicable	Not applicable
CEND1	Cell cycle exit and neuronal differentiation protein 1	Q8N111	0	0	0	1	FALSE	Not applicable	Not applicable	Not applicable	Not applicable
CENPF	Centromere protein F	P49454	0	0	0	1	FALSE	Not applicable	Not applicable	Not applicable	Not applicable
CENPJ	Centromere protein J	Q9HC77	0	0	0	1	FALSE	Not applicable	Not applicable	Not applicable	Not applicable
CEP112	Centrosomal protein of 112 kDa	Q8N8E3	0	0	0	1	FALSE	Not applicable	Not applicable	Not applicable	Not applicable
CEP152	Centrosomal protein of 152 kDa	O94986	0	0	0	1	FALSE	Not applicable	Not applicable	Not applicable	Not applicable
CEP164	Centrosomal protein of 164 kDa	Q9UPV0	0	0	0	1	TRUE	0	0	0	1
CEP170	Centrosomal protein of 170 kDa	Q5SW79	0	0	0	1	FALSE	Not applicable	Not applicable	Not applicable	Not applicable
CEP20	Centrosomal protein 20	Q96NB1	0	0	1	1	TRUE	0	0	1	1
CEP290	Centrosomal protein of 290 kDa	O15078	0	0	0	1	FALSE	Not applicable	Not applicable	Not applicable	Not applicable
CEP350	Centrosome-associated protein 350	Q5VT06	0	0	0	1	FALSE	Not applicable	Not applicable	Not applicable	Not applicable
CEP43	Centrosomal protein 43	O95684	0	0	1	1	TRUE	0	0	1	1
CEP85	Centrosomal protein of 85 kDa	Q6P2H3	0	0	1	1	TRUE	0	0	1	1
CERT	Ceramide transfer protein	Q9Y5P4	0	0	0	1	TRUE	0	0	0	1
CES1	Liver carboxylesterase 1	P23141	1	1	0	1	TRUE	1	1	0	1
CES2	Cocaine esterase	O00748	0	0	0	1	TRUE	0	0	0	1
CES3	Carboxylesterase 3	Q6UWW8	0	1	0	1	TRUE	0	1	0	1
CETN2	Centrin-2	P41208	0	0	0	1	TRUE	0	0	0	1
CETN3	Centrin-3	O15182	0	0	0	1	FALSE	Not applicable	Not applicable	Not applicable	Not applicable
CFB	Complement factor B	P00751	0	0	0	1	FALSE	Not applicable	Not applicable	Not applicable	Not applicable
CFC1	Cryptic protein	P0CG37	0	0	0	1	TRUE	0	0	0	1
CFD	Complement factor D	P00746	0	0	0	1	FALSE	Not applicable	Not applicable	Not applicable	Not applicable
CFH	Complement factor H	P08603	1	1	1	1	FALSE	Not applicable	Not applicable	Not applicable	Not applicable
CFHR2	Complement factor H-related protein 2	P36980	0	0	0	1	FALSE	Not applicable	Not applicable	Not applicable	Not applicable
CFHR4	Complement factor H-related protein 4	Q92496	0	0	1	1	FALSE	Not applicable	Not applicable	Not applicable	Not applicable
CFHR5	Complement factor H-related protein 5	Q9BXR6	0	0	1	1	FALSE	Not applicable	Not applicable	Not applicable	Not applicable
CFI	Complement factor I	P05156	0	0	1	1	FALSE	Not applicable	Not applicable	Not applicable	Not applicable
CFP	Properdin	P27918	0	0	0	1	FALSE	Not applicable	Not applicable	Not applicable	Not applicable
CGA	Glycoprotein hormones alpha chain	P01215	0	1	0	1	TRUE	0	1	0	1
CGB3_CGB5_CGB8	Choriogonadotropin subunit beta 3	P0DN86	0	0	0	1	FALSE	Not applicable	Not applicable	Not applicable	Not applicable
CGN	Cingulin	Q9P2M7	0	1	0	1	FALSE	Not applicable	Not applicable	Not applicable	Not applicable
CGREF1	Cell growth regulator with EF hand domain protein 1	Q99674	0	0	0	1	TRUE	0	0	0	1
CHAC2	Glutathione-specific gamma-glutamylcyclotransferase 2	Q8WUX2	0	0	0	1	TRUE	0	0	0	1
CHAD	Chondroadherin	O15335	0	0	0	1	FALSE	Not applicable	Not applicable	Not applicable	Not applicable
CHCHD10	Coiled-coil-helix-coiled-coil-helix domain-containing protein 10, mitochondrial	Q8WYQ3	0	0	0	1	FALSE	Not applicable	Not applicable	Not applicable	Not applicable
CHCHD6	MICOS complex subunit MIC25	Q9BRQ6	0	0	0	1	FALSE	Not applicable	Not applicable	Not applicable	Not applicable
CHEK2	Serine/threonine-protein kinase Chk2	O96017	0	0	0	1	TRUE	0	0	0	1
CHGA	Chromogranin-A	P10645	0	0	0	1	FALSE	Not applicable	Not applicable	Not applicable	Not applicable
CHGB	Secretogranin-1	P05060	0	0	0	1	TRUE	0	0	0	1
CHI3L1	Chitinase-3-like protein 1	P36222	0	1	0	1	TRUE	0	1	0	1
CHIT1	Chitotriosidase-1	Q13231	0	1	0	1	TRUE	0	1	0	1
CHL1	Neural cell adhesion molecule L1-like protein	O00533	0	1	1	1	TRUE	0	1	1	1
CHM	Rab proteins geranylgeranyltransferase component A 1	P24386	0	0	0	1	FALSE	Not applicable	Not applicable	Not applicable	Not applicable
CHMP1A	Charged multivesicular body protein 1a	Q9HD42	0	0	0	1	TRUE	0	0	0	1
CHMP6	Charged multivesicular body protein 6	Q96FZ7	0	0	0	1	FALSE	Not applicable	Not applicable	Not applicable	Not applicable
CHP1	Calcineurin B homologous protein 1	Q99653	0	0	0	1	FALSE	Not applicable	Not applicable	Not applicable	Not applicable
CHRDL1	Chordin-like protein 1	Q9BU40	0	0	0	1	TRUE	0	0	0	1
CHRDL2	Chordin-like protein 2	Q6WN34	1	0	0	1	TRUE	1	0	0	1
CHRM1	Muscarinic acetylcholine receptor M1	P11229	0	0	1	1	FALSE	Not applicable	Not applicable	Not applicable	Not applicable
CIAPIN1	Anamorsin	Q6FI81	0	0	0	1	TRUE	0	0	0	1
CILP	Cartilage intermediate layer protein 1	O75339	0	0	1	1	FALSE	Not applicable	Not applicable	Not applicable	Not applicable
CINP	Cyclin-dependent kinase 2-interacting protein	Q9BW66	0	0	0	1	FALSE	Not applicable	Not applicable	Not applicable	Not applicable
CIRBP	Cold-inducible RNA-binding protein	Q14011	0	0	0	1	FALSE	Not applicable	Not applicable	Not applicable	Not applicable
CIT	Citron Rho-interacting kinase	O14578	0	0	0	1	FALSE	Not applicable	Not applicable	Not applicable	Not applicable
CKAP4	Cytoskeleton-associated protein 4	Q07065	0	0	0	1	TRUE	0	0	0	1
CKB	Creatine kinase B-type	P12277	0	0	0	1	FALSE	Not applicable	Not applicable	Not applicable	Not applicable
CKMT1A_CKMT1B	Creatine kinase U-type, mitochondrial	P12532	0	0	0	1	TRUE	0	0	0	1
CLASP1	CLIP-associating protein 1	Q7Z460	0	0	1	1	FALSE	Not applicable	Not applicable	Not applicable	Not applicable
CLC	Galectin-10	Q05315	0	0	0	1	TRUE	0	0	0	1
CLEC10A	C-type lectin domain family 10 member A	Q8IUN9	0	1	0	1	TRUE	0	1	0	1
CLEC11A	C-type lectin domain family 11 member A	Q9Y240	0	0	0	1	TRUE	0	0	0	1
CLEC12A	C-type lectin domain family 12 member A	Q5QGZ9	0	0	0	1	FALSE	Not applicable	Not applicable	Not applicable	Not applicable
CLEC14A	C-type lectin domain family 14 member A	Q86T13	0	0	1	1	TRUE	0	0	1	1
CLEC1A	C-type lectin domain family 1 member A	Q8NC01	0	0	0	1	TRUE	0	0	0	1
CLEC1B	C-type lectin domain family 1 member B	Q9P126	0	0	0	1	TRUE	0	0	0	1
CLEC2L	C-type lectin domain family 2 member L	P0C7M8	0	0	0	1	FALSE	Not applicable	Not applicable	Not applicable	Not applicable
CLEC3B	Tetranectin	P05452	0	0	0	1	FALSE	Not applicable	Not applicable	Not applicable	Not applicable
CLEC4A	C-type lectin domain family 4 member A	Q9UMR7	0	0	0	1	TRUE	0	0	0	1
CLEC4C	C-type lectin domain family 4 member C	Q8WTT0	0	0	0	1	TRUE	0	0	0	1
CLEC4D	C-type lectin domain family 4 member D	Q8WXI8	0	0	0	1	TRUE	0	0	0	1
CLEC4G	C-type lectin domain family 4 member G	Q6UXB4	0	0	1	1	TRUE	0	0	1	1
CLEC4M	C-type lectin domain family 4 member M	Q9H2X3	0	0	0	1	FALSE	Not applicable	Not applicable	Not applicable	Not applicable
CLEC5A	C-type lectin domain family 5 member A	Q9NY25	1	0	0	1	TRUE	1	0	0	1
CLEC6A	C-type lectin domain family 6 member A	Q6EIG7	0	0	0	1	TRUE	0	0	0	1
CLEC7A	C-type lectin domain family 7 member A	Q9BXN2	0	0	0	1	TRUE	0	0	0	1
CLGN	Calmegin	O14967	0	0	0	1	FALSE	Not applicable	Not applicable	Not applicable	Not applicable
CLIC5	Chloride intracellular channel protein 5	Q9NZA1	0	0	0	1	FALSE	Not applicable	Not applicable	Not applicable	Not applicable
CLINT1	Clathrin interactor 1	Q14677	0	0	0	1	FALSE	Not applicable	Not applicable	Not applicable	Not applicable
CLIP2	CAP-Gly domain-containing linker protein 2	Q9UDT6	0	0	0	1	TRUE	0	0	0	1
CLMP	CXADR-like membrane protein	Q9H6B4	0	0	0	1	TRUE	0	0	0	1
CLNS1A	Methylosome subunit pICln	P54105	0	0	1	1	FALSE	Not applicable	Not applicable	Not applicable	Not applicable
CLPP	ATP-dependent Clp protease proteolytic subunit, mitochondrial	Q16740	0	0	1	1	TRUE	0	0	1	1
CLPS	Colipase	P04118	0	0	0	1	TRUE	0	0	0	1
CLSPN	Claspin	Q9HAW4	0	0	0	1	TRUE	0	0	0	1
CLSTN1	Calsyntenin-1	O94985	0	0	0	1	TRUE	0	0	0	1
CLSTN2	Calsyntenin-2	Q9H4D0	0	0	1	1	TRUE	0	0	1	1
CLSTN3	Calsyntenin-3	Q9BQT9	0	0	0	1	FALSE	Not applicable	Not applicable	Not applicable	Not applicable
CLTA	Clathrin light chain A	P09496	0	0	0	1	TRUE	0	0	0	1
CLU	Clusterin	P10909	1	1	0	1	FALSE	Not applicable	Not applicable	Not applicable	Not applicable
CLUL1	Clusterin-like protein 1	Q15846	0	0	1	1	TRUE	0	0	1	1
CMC1	COX assembly mitochondrial protein homolog	Q7Z7K0	0	0	0	1	FALSE	Not applicable	Not applicable	Not applicable	Not applicable
CMIP	C-Maf-inducing protein	Q8IY22	0	0	1	1	FALSE	Not applicable	Not applicable	Not applicable	Not applicable
CNDP1	Beta-Ala-His dipeptidase	Q96KN2	0	0	0	1	TRUE	0	0	0	1
CNGB3	Cyclic nucleotide-gated cation channel beta-3	Q9NQW8	0	0	0	1	FALSE	Not applicable	Not applicable	Not applicable	Not applicable
CNP	2',3'-cyclic-nucleotide 3'-phosphodiesterase	P09543	0	1	0	1	FALSE	Not applicable	Not applicable	Not applicable	Not applicable
CNPY2	Protein canopy homolog 2	Q9Y2B0	0	0	0	1	TRUE	0	0	0	1
CNPY4	Protein canopy homolog 4	Q8N129	0	0	0	1	TRUE	0	0	0	1
CNST	Consortin	Q6PJW8	0	0	0	1	TRUE	0	0	0	1
CNTF	Ciliary neurotrophic factor	P26441	0	0	0	1	FALSE	Not applicable	Not applicable	Not applicable	Not applicable
CNTN1	Contactin-1	Q12860	0	0	1	1	TRUE	0	0	1	1
CNTN2	Contactin-2	Q02246	0	0	1	1	TRUE	0	0	1	1
CNTN3	Contactin-3	Q9P232	0	1	0	1	TRUE	0	1	0	1
CNTN4	Contactin-4	Q8IWV2	1	0	1	1	TRUE	1	0	1	1
CNTN5	Contactin-5	O94779	1	0	1	1	TRUE	1	0	1	1
CNTNAP2	Contactin-associated protein-like 2	Q9UHC6	0	0	1	1	TRUE	0	0	1	1
CNTNAP4	Contactin-associated protein-like 4	Q9C0A0	0	0	0	1	FALSE	Not applicable	Not applicable	Not applicable	Not applicable
COCH	Cochlin	O43405	0	0	0	1	FALSE	Not applicable	Not applicable	Not applicable	Not applicable
COL15A1	Collagen alpha-1(XV) chain	P39059	1	1	0	1	FALSE	Not applicable	Not applicable	Not applicable	Not applicable
COL18A1	Collagen alpha-1(XVIII) chain	P39060	1	0	0	1	TRUE	1	0	0	1
COL1A1	Collagen alpha-1(I) chain	P02452	1	0	0	1	TRUE	1	0	0	1
COL24A1	Collagen alpha-1(XXIV) chain	Q17RW2	0	0	0	1	FALSE	Not applicable	Not applicable	Not applicable	Not applicable
COL28A1	Collagen alpha-1(XXVIII) chain	Q2UY09	0	0	0	1	FALSE	Not applicable	Not applicable	Not applicable	Not applicable
COL2A1	Collagen alpha-1(II) chain	P02458	0	0	0	1	FALSE	Not applicable	Not applicable	Not applicable	Not applicable
COL3A1	Collagen alpha-1(III) chain	P02461	1	1	0	1	FALSE	Not applicable	Not applicable	Not applicable	Not applicable
COL4A1	Collagen alpha-1(IV) chain	P02462	1	1	0	1	TRUE	1	1	0	1
COL4A4	Collagen alpha-4(IV) chain	P53420	0	0	0	1	FALSE	Not applicable	Not applicable	Not applicable	Not applicable
COL5A1	Collagen alpha-1(V) chain	P20908	1	0	0	1	FALSE	Not applicable	Not applicable	Not applicable	Not applicable
COL6A3	Collagen alpha-3(VI) chain	P12111	0	0	0	1	TRUE	0	0	0	1
COL9A1	Collagen alpha-1(IX) chain	P20849	0	0	0	1	TRUE	0	0	0	1
COL9A2	Collagen alpha-2(IX) chain	Q14055	0	0	0	1	FALSE	Not applicable	Not applicable	Not applicable	Not applicable
COLEC12	Collectin-12	Q5KU26	0	1	0	1	TRUE	0	1	0	1
COMMD1	COMM domain-containing protein 1	Q8N668	0	0	0	1	FALSE	Not applicable	Not applicable	Not applicable	Not applicable
COMMD9	COMM domain-containing protein 9	Q9P000	0	0	0	1	FALSE	Not applicable	Not applicable	Not applicable	Not applicable
COMP	Cartilage oligomeric matrix protein	P49747	1	1	1	1	TRUE	1	1	1	1
COMT	Catechol O-methyltransferase	P21964	0	0	0	1	TRUE	0	0	0	1
COPB2	Coatomer subunit beta'	P35606	0	0	0	1	FALSE	Not applicable	Not applicable	Not applicable	Not applicable
COPE	Coatomer subunit epsilon	O14579	0	0	0	1	TRUE	0	0	0	1
COQ7	5-demethoxyubiquinone hydroxylase, mitochondrial	Q99807	0	0	0	1	FALSE	Not applicable	Not applicable	Not applicable	Not applicable
CORO1A	Coronin-1A	P31146	0	0	0	1	TRUE	0	0	0	1
CORO6	Coronin-6	Q6QEF8	0	0	0	1	FALSE	Not applicable	Not applicable	Not applicable	Not applicable
COX5B	Cytochrome c oxidase subunit 5B, mitochondrial	P10606	0	0	0	1	TRUE	0	0	0	1
COX6B1	Cytochrome c oxidase subunit 6B1	P14854	0	0	0	1	FALSE	Not applicable	Not applicable	Not applicable	Not applicable
CPA1	Carboxypeptidase A1	P15085	0	0	0	1	TRUE	0	0	0	1
CPA2	Carboxypeptidase A2	P48052	0	0	0	1	TRUE	0	0	0	1
CPA4	Carboxypeptidase A4	Q9UI42	0	0	1	1	FALSE	Not applicable	Not applicable	Not applicable	Not applicable
CPB1	Carboxypeptidase B	P15086	0	0	0	1	TRUE	0	0	0	1
CPB2	Carboxypeptidase B2	Q96IY4	0	1	0	1	FALSE	Not applicable	Not applicable	Not applicable	Not applicable
CPE	Carboxypeptidase E	P16870	1	0	1	1	TRUE	1	0	1	1
CPLX2	Complexin-2	Q6PUV4	0	0	0	1	FALSE	Not applicable	Not applicable	Not applicable	Not applicable
CPM	Carboxypeptidase M	P14384	0	0	0	1	TRUE	0	0	0	1
CPOX	Oxygen-dependent coproporphyrinogen-III oxidase, mitochondrial	P36551	0	0	0	1	FALSE	Not applicable	Not applicable	Not applicable	Not applicable
CPPED1	Serine/threonine-protein phosphatase CPPED1	Q9BRF8	0	0	0	1	TRUE	0	0	0	1
CPQ	Carboxypeptidase Q	Q9Y646	0	0	0	1	FALSE	Not applicable	Not applicable	Not applicable	Not applicable
CPTP	Ceramide-1-phosphate transfer protein	Q5TA50	0	0	0	1	FALSE	Not applicable	Not applicable	Not applicable	Not applicable
CPVL	Probable serine carboxypeptidase CPVL	Q9H3G5	0	0	0	1	TRUE	0	0	0	1
CPXM1	Probable carboxypeptidase X1	Q96SM3	0	0	0	1	TRUE	0	0	0	1
CPXM2	Inactive carboxypeptidase-like protein X2	Q8N436	1	0	0	1	FALSE	Not applicable	Not applicable	Not applicable	Not applicable
CR1	Complement receptor type 1	P17927	0	1	0	1	FALSE	Not applicable	Not applicable	Not applicable	Not applicable
CR2	Complement receptor type 2	P20023	0	0	0	1	TRUE	0	0	0	1
CRACR2A	EF-hand calcium-binding domain-containing protein 4B	Q9BSW2	0	0	0	1	TRUE	0	0	0	1
CRADD	Death domain-containing protein CRADD	P78560	0	0	0	1	TRUE	0	0	0	1
CREB3	Cyclic AMP-responsive element-binding protein 3	O43889	0	1	0	1	FALSE	Not applicable	Not applicable	Not applicable	Not applicable
CREBZF	CREB/ATF bZIP transcription factor	Q9NS37	0	0	0	1	FALSE	Not applicable	Not applicable	Not applicable	Not applicable
CREG1	Protein CREG1	O75629	0	1	0	1	TRUE	0	1	0	1
CRELD1	Protein disulfide isomerase CRELD1	Q96HD1	0	0	0	1	FALSE	Not applicable	Not applicable	Not applicable	Not applicable
CRELD2	Protein disulfide isomerase CRELD2	Q6UXH1	0	0	0	1	TRUE	0	0	0	1
CRH	Corticoliberin	P06850	0	0	0	1	TRUE	0	0	0	1
CRHBP	Corticotropin-releasing factor-binding protein	P24387	0	0	0	1	TRUE	0	0	0	1
CRHR1	Corticotropin-releasing factor receptor 1	P34998	0	0	0	1	TRUE	0	0	0	1
CRIM1	Cysteine-rich motor neuron 1 protein	Q9NZV1	1	1	1	1	TRUE	1	1	1	1
CRIP2	Cysteine-rich protein 2	P52943	1	0	0	1	TRUE	1	0	0	1
CRISP2	Cysteine-rich secretory protein 2	P16562	0	1	1	1	TRUE	0	1	1	1
CRISP3	Cysteine-rich secretory protein 3	P54108	0	0	0	1	FALSE	Not applicable	Not applicable	Not applicable	Not applicable
CRKL	Crk-like protein	P46109	0	0	0	1	TRUE	0	0	0	1
CRLF1	Cytokine receptor-like factor 1	O75462	1	0	0	1	TRUE	1	0	0	1
CRNN	Cornulin	Q9UBG3	0	0	0	1	TRUE	0	0	0	1
CRTAC1	Cartilage acidic protein 1	Q9NQ79	1	0	0	1	TRUE	1	0	0	1
CRTAM	Cytotoxic and regulatory T-cell molecule	O95727	0	0	0	1	TRUE	0	0	0	1
CRTAP	Cartilage-associated protein	O75718	0	0	0	1	FALSE	Not applicable	Not applicable	Not applicable	Not applicable
CRX	Cone-rod homeobox protein	O43186	0	0	0	1	TRUE	0	0	0	1
CRYBB1	Beta-crystallin B1	P53674	0	0	0	1	FALSE	Not applicable	Not applicable	Not applicable	Not applicable
CRYBB2	Beta-crystallin B2	P43320	0	0	0	1	FALSE	Not applicable	Not applicable	Not applicable	Not applicable
CRYGD	Gamma-crystallin D	P07320	0	1	0	1	FALSE	Not applicable	Not applicable	Not applicable	Not applicable
CRYM	Ketimine reductase mu-crystallin	Q14894	0	0	0	1	FALSE	Not applicable	Not applicable	Not applicable	Not applicable
CRYZL1	Quinone oxidoreductase-like protein 1	O95825	0	0	0	1	FALSE	Not applicable	Not applicable	Not applicable	Not applicable
CSDE1	Cold shock domain-containing protein E1	O75534	0	0	0	1	FALSE	Not applicable	Not applicable	Not applicable	Not applicable
CSF1	Macrophage colony-stimulating factor 1	P09603	0	1	0	1	TRUE	0	1	0	1
CSF1R	Macrophage colony-stimulating factor 1 receptor	P07333	0	1	0	1	FALSE	Not applicable	Not applicable	Not applicable	Not applicable
CSF2	Granulocyte-macrophage colony-stimulating factor	P04141	0	1	0	1	FALSE	Not applicable	Not applicable	Not applicable	Not applicable
CSF2RA	Granulocyte-macrophage colony-stimulating factor receptor subunit alpha	P15509	0	0	0	1	TRUE	0	0	0	1
CSF2RB	Cytokine receptor common subunit beta	P32927	0	0	0	1	FALSE	Not applicable	Not applicable	Not applicable	Not applicable
CSF3	Granulocyte colony-stimulating factor	P09919	0	1	1	1	TRUE	0	1	1	1
CSF3R	Granulocyte colony-stimulating factor receptor	Q99062	0	0	0	1	FALSE	Not applicable	Not applicable	Not applicable	Not applicable
CSH1	Chorionic somatomammotropin hormone 1	P0DML2	0	0	0	1	FALSE	Not applicable	Not applicable	Not applicable	Not applicable
CSNK1D	Casein kinase I isoform delta	P48730	0	0	0	1	FALSE	Not applicable	Not applicable	Not applicable	Not applicable
CSNK2A1	Casein kinase II subunit alpha	P68400	0	0	0	1	FALSE	Not applicable	Not applicable	Not applicable	Not applicable
CSPG4	Chondroitin sulfate proteoglycan 4	Q6UVK1	1	0	1	1	FALSE	Not applicable	Not applicable	Not applicable	Not applicable
CSPG5	Chondroitin sulfate proteoglycan 5	O95196	0	0	0	1	FALSE	Not applicable	Not applicable	Not applicable	Not applicable
CSRP3	Cysteine and glycine-rich protein 3	P50461	0	0	1	1	FALSE	Not applicable	Not applicable	Not applicable	Not applicable
CST1	Cystatin-SN	P01037	0	0	0	1	FALSE	Not applicable	Not applicable	Not applicable	Not applicable
CST3	Cystatin-C	P01034	0	1	0	1	TRUE	0	1	0	1
CST5	Cystatin-D	P28325	0	0	0	1	TRUE	0	0	0	1
CST6	Cystatin-M	Q15828	1	0	0	1	TRUE	1	0	0	1
CST7	Cystatin-F	O76096	0	0	0	1	TRUE	0	0	0	1
CSTB	Cystatin-B	P04080	0	0	0	1	TRUE	0	0	0	1
CTAG1A_CTAG1B	Cancer/testis antigen 1	P78358	0	0	0	1	FALSE	Not applicable	Not applicable	Not applicable	Not applicable
CTBS	Di-N-acetylchitobiase	Q01459	0	1	0	1	FALSE	Not applicable	Not applicable	Not applicable	Not applicable
CTF1	Cardiotrophin-1	Q16619	0	1	0	1	TRUE	0	1	0	1
CTHRC1	Collagen triple helix repeat-containing protein 1	Q96CG8	1	0	1	1	FALSE	Not applicable	Not applicable	Not applicable	Not applicable
CTLA4	Cytotoxic T-lymphocyte protein 4	P16410	0	0	0	1	FALSE	Not applicable	Not applicable	Not applicable	Not applicable
CTNNA1	Catenin alpha-1	P35221	0	1	0	1	FALSE	Not applicable	Not applicable	Not applicable	Not applicable
CTRB1	Chymotrypsinogen B	P17538	0	0	0	1	TRUE	0	0	0	1
CTRC	Chymotrypsin-C	Q99895	0	0	0	1	TRUE	0	0	0	1
CTRL	Chymotrypsin-like protease CTRL-1	P40313	0	0	0	1	FALSE	Not applicable	Not applicable	Not applicable	Not applicable
CTSB	Cathepsin B	P07858	0	1	1	1	TRUE	0	1	1	1
CTSC	Dipeptidyl peptidase 1	P53634	0	1	0	1	TRUE	0	1	0	1
CTSD	Cathepsin D	P07339	0	0	1	1	TRUE	0	0	1	1
CTSE	Cathepsin E	P14091	0	0	0	1	FALSE	Not applicable	Not applicable	Not applicable	Not applicable
CTSF	Cathepsin F	Q9UBX1	0	0	0	1	TRUE	0	0	0	1
CTSH	Pro-cathepsin H	P09668	0	0	0	1	TRUE	0	0	0	1
CTSL	Cathepsin L1	P07711	0	1	0	1	TRUE	0	1	0	1
CTSO	Cathepsin O	P43234	0	0	0	1	TRUE	0	0	0	1
CTSS	Cathepsin S	P25774	0	1	0	1	TRUE	0	1	0	1
CTSV	Cathepsin L2	O60911	0	0	0	1	TRUE	0	0	0	1
CTSZ	Cathepsin Z	Q9UBR2	0	0	0	1	TRUE	0	0	0	1
CUZD1	CUB and zona pellucida-like domain-containing protein 1	Q86UP6	0	0	0	1	FALSE	Not applicable	Not applicable	Not applicable	Not applicable
CWC15	Spliceosome-associated protein CWC15 homolog	Q9P013	0	0	0	1	FALSE	Not applicable	Not applicable	Not applicable	Not applicable
CX3CL1	Fractalkine	P78423	1	1	1	1	TRUE	1	1	1	1
CXADR	Coxsackievirus and adenovirus receptor	P78310	0	0	0	1	TRUE	0	0	0	1
CXCL1	Growth-regulated alpha protein	P09341	0	1	0	1	TRUE	0	1	0	1
CXCL10	C-X-C motif chemokine 10	P02778	0	1	1	1	TRUE	0	1	1	1
CXCL11	C-X-C motif chemokine 11	O14625	0	1	0	1	TRUE	0	1	0	1
CXCL12	Stromal cell-derived factor 1	P48061	0	1	0	1	TRUE	0	1	0	1
CXCL13	C-X-C motif chemokine 13	O43927	0	1	1	1	TRUE	0	1	1	1
CXCL14	C-X-C motif chemokine 14	O95715	0	0	0	1	TRUE	0	0	0	1
CXCL16	C-X-C motif chemokine 16	Q9H2A7	0	1	0	1	TRUE	0	1	0	1
CXCL17	C-X-C motif chemokine 17	Q6UXB2	0	0	0	1	TRUE	0	0	0	1
CXCL3	C-X-C motif chemokine 3	P19876	0	1	0	1	TRUE	0	1	0	1
CXCL5	C-X-C motif chemokine 5	P42830	0	1	0	1	TRUE	0	1	0	1
CXCL6	C-X-C motif chemokine 6	P80162	0	0	0	1	TRUE	0	0	0	1
CXCL8	Interleukin-8	P10145	0	1	0	1	TRUE	0	1	0	1
CXCL9	C-X-C motif chemokine 9	Q07325	1	1	0	1	TRUE	1	1	0	1
CYB5A	Cytochrome b5	P00167	0	0	0	1	FALSE	Not applicable	Not applicable	Not applicable	Not applicable
CYB5R2	NADH-cytochrome b5 reductase 2	Q6BCY4	0	0	0	1	FALSE	Not applicable	Not applicable	Not applicable	Not applicable
CYP24A1	1,25-dihydroxyvitamin D(3) 24-hydroxylase, mitochondrial	Q07973	0	0	0	1	FALSE	Not applicable	Not applicable	Not applicable	Not applicable
CYTH3	Cytohesin-3	O43739	0	0	0	1	FALSE	Not applicable	Not applicable	Not applicable	Not applicable
CYTL1	Cytokine-like protein 1	Q9NRR1	1	0	0	1	FALSE	Not applicable	Not applicable	Not applicable	Not applicable
DAAM1	Disheveled-associated activator of morphogenesis 1	Q9Y4D1	0	0	0	1	FALSE	Not applicable	Not applicable	Not applicable	Not applicable
DAB2	Disabled homolog 2	P98082	0	0	0	1	TRUE	0	0	0	1
DAG1	Dystroglycan	Q14118	0	1	0	1	TRUE	0	1	0	1
DAND5	DAN domain family member 5	Q8N907	0	0	0	1	FALSE	Not applicable	Not applicable	Not applicable	Not applicable
DAPK2	Death-associated protein kinase 2	Q9UIK4	0	1	0	1	FALSE	Not applicable	Not applicable	Not applicable	Not applicable
DAPP1	Dual adapter for phosphotyrosine and 3-phosphotyrosine and 3-phosphoinositide	Q9UN19	0	0	0	1	TRUE	0	0	0	1
DARS1	Aspartate--tRNA ligase, cytoplasmic	P14868	0	0	0	1	TRUE	0	0	0	1
DBH	Dopamine beta-hydroxylase	P09172	0	0	0	1	FALSE	Not applicable	Not applicable	Not applicable	Not applicable
DBI	Acyl-CoA-binding protein	P07108	0	0	0	1	TRUE	0	0	0	1
DBN1	Drebrin	Q16643	0	0	0	1	FALSE	Not applicable	Not applicable	Not applicable	Not applicable
DBNL	Drebrin-like protein	Q9UJU6	0	0	0	1	TRUE	0	0	0	1
DCBLD2	Discoidin, CUB and LCCL domain-containing protein 2	Q96PD2	0	0	0	1	TRUE	0	0	0	1
DCC	Netrin receptor DCC	P43146	0	0	0	1	FALSE	Not applicable	Not applicable	Not applicable	Not applicable
DCDC2C	Doublecortin domain-containing protein 2C	A8MYV0	1	0	0	1	FALSE	Not applicable	Not applicable	Not applicable	Not applicable
DCLRE1C	Protein artemis	Q96SD1	0	0	0	1	FALSE	Not applicable	Not applicable	Not applicable	Not applicable
DCN	Decorin	P07585	0	1	0	1	TRUE	0	1	0	1
DCTD	Deoxycytidylate deaminase	P32321	0	0	0	1	FALSE	Not applicable	Not applicable	Not applicable	Not applicable
DCTN1	Dynactin subunit 1	Q14203	0	0	0	1	TRUE	0	0	0	1
DCTN2	Dynactin subunit 2	Q13561	0	0	0	1	TRUE	0	0	0	1
DCTN6	Dynactin subunit 6	O00399	0	1	0	1	TRUE	0	1	0	1
DCTPP1	dCTP pyrophosphatase 1	Q9H773	0	0	0	1	TRUE	0	0	0	1
DCUN1D1	DCN1-like protein 1	Q96GG9	0	0	0	1	FALSE	Not applicable	Not applicable	Not applicable	Not applicable
DCUN1D2	DCN1-like protein 2	Q6PH85	0	0	0	1	FALSE	Not applicable	Not applicable	Not applicable	Not applicable
DCXR	L-xylulose reductase	Q7Z4W1	0	0	0	1	TRUE	0	0	0	1
DDA1	DET1- and DDB1-associated protein 1	Q9BW61	0	0	0	1	FALSE	Not applicable	Not applicable	Not applicable	Not applicable
DDAH1	N(G),N(G)-dimethylarginine dimethylaminohydrolase 1	O94760	0	1	0	1	TRUE	0	1	0	1
DDC	Aromatic-L-amino-acid decarboxylase	P20711	0	0	0	1	TRUE	0	0	0	1
DDHD2	Phospholipase DDHD2	O94830	0	0	0	1	FALSE	Not applicable	Not applicable	Not applicable	Not applicable
DDI2	Protein DDI1 homolog 2	Q5TDH0	0	0	0	1	FALSE	Not applicable	Not applicable	Not applicable	Not applicable
DDR1	Epithelial discoidin domain-containing receptor 1	Q08345	0	1	1	1	TRUE	0	1	1	1
DDT	D-dopachrome decarboxylase	P30046	0	0	1	1	FALSE	Not applicable	Not applicable	Not applicable	Not applicable
DDX1	ATP-dependent RNA helicase DDX1	Q92499	0	0	0	1	FALSE	Not applicable	Not applicable	Not applicable	Not applicable
DDX25	ATP-dependent RNA helicase DDX25	Q9UHL0	0	0	0	1	FALSE	Not applicable	Not applicable	Not applicable	Not applicable
DDX39A	ATP-dependent RNA helicase DDX39A	O00148	0	0	0	1	FALSE	Not applicable	Not applicable	Not applicable	Not applicable
DDX4	Probable ATP-dependent RNA helicase DDX4	Q9NQI0	0	0	0	1	FALSE	Not applicable	Not applicable	Not applicable	Not applicable
DDX53	Probable ATP-dependent RNA helicase DDX53	Q86TM3	0	0	0	1	FALSE	Not applicable	Not applicable	Not applicable	Not applicable
DDX58	Antiviral innate immune response receptor RIG-I	O95786	0	0	0	1	TRUE	0	0	0	1
DECR1	2,4-dienoyl-CoA reductase, mitochondrial	Q16698	0	1	0	1	TRUE	0	1	0	1
DEFA1_DEFA1B	Neutrophil defensin 1	P59665	0	0	0	1	TRUE	0	0	0	1
DEFB103A_DEFB103B	Beta-defensin 103	P81534	0	0	0	1	FALSE	Not applicable	Not applicable	Not applicable	Not applicable
DEFB104A_DEFB104B	Beta-defensin 104	Q8WTQ1	0	0	0	1	FALSE	Not applicable	Not applicable	Not applicable	Not applicable
DEFB116	Beta-defensin 116	Q30KQ4	0	0	0	1	FALSE	Not applicable	Not applicable	Not applicable	Not applicable
DEFB118	Beta-defensin 118	Q96PH6	0	0	0	1	FALSE	Not applicable	Not applicable	Not applicable	Not applicable
DEFB4A_DEFB4B	Beta-defensin 4A	O15263	0	0	0	1	TRUE	0	0	0	1
DENND2B	DENN domain-containing protein 2B	P78524	0	0	0	1	FALSE	Not applicable	Not applicable	Not applicable	Not applicable
DENR	Density-regulated protein	O43583	0	0	0	1	FALSE	Not applicable	Not applicable	Not applicable	Not applicable
DFFA	DNA fragmentation factor subunit alpha	O00273	0	0	0	1	TRUE	0	0	0	1
DGCR6	Protein DGCR6	Q14129	0	0	0	1	FALSE	Not applicable	Not applicable	Not applicable	Not applicable
DGKA	Diacylglycerol kinase alpha	P23743	0	0	0	1	FALSE	Not applicable	Not applicable	Not applicable	Not applicable
DGKZ	Diacylglycerol kinase zeta	Q13574	0	0	0	1	TRUE	0	0	0	1
DHODH	Dihydroorotate dehydrogenase	Q02127	0	0	0	1	FALSE	Not applicable	Not applicable	Not applicable	Not applicable
DHPS	Deoxyhypusine synthase	P49366	0	0	0	1	FALSE	Not applicable	Not applicable	Not applicable	Not applicable
DHRS4L2	Dehydrogenase/reductase SDR family member 4-like 2	Q6PKH6	0	0	0	1	FALSE	Not applicable	Not applicable	Not applicable	Not applicable
DIABLO	Diablo homolog, mitochondrial	Q9NR28	0	0	0	1	TRUE	0	0	0	1
DIPK1C	Divergent protein kinase domain 1C	Q0P6D2	0	0	0	1	FALSE	Not applicable	Not applicable	Not applicable	Not applicable
DIPK2B	Divergent protein kinase domain 2B	Q9H7Y0	0	0	0	1	FALSE	Not applicable	Not applicable	Not applicable	Not applicable
DKK1	Dickkopf-related protein 1	O94907	0	1	0	1	TRUE	0	1	0	1
DKK3	Dickkopf-related protein 3	Q9UBP4	1	0	0	1	TRUE	1	0	0	1
DKK4	Dickkopf-related protein 4	Q9UBT3	0	0	0	1	TRUE	0	0	0	1
DKKL1	Dickkopf-like protein 1	Q9UK85	0	0	1	1	TRUE	0	0	1	1
DLG4	Disks large homolog 4	P78352	0	1	0	1	FALSE	Not applicable	Not applicable	Not applicable	Not applicable
DLGAP5	Disks large-associated protein 5	Q15398	0	0	0	1	FALSE	Not applicable	Not applicable	Not applicable	Not applicable
DLK1	Protein delta homolog 1	P80370	0	1	0	1	TRUE	0	1	0	1
DLL1	Delta-like protein 1	O00548	0	0	0	1	TRUE	0	0	0	1
DLL4	Delta-like protein 4	Q9NR61	0	1	0	1	FALSE	Not applicable	Not applicable	Not applicable	Not applicable
DMD	Dystrophin	P11532	1	1	0	1	FALSE	Not applicable	Not applicable	Not applicable	Not applicable
DMP1	Dentin matrix acidic phosphoprotein 1	Q13316	1	0	0	1	FALSE	Not applicable	Not applicable	Not applicable	Not applicable
DNAJA1	DnaJ homolog subfamily A member 1	P31689	0	0	0	1	FALSE	Not applicable	Not applicable	Not applicable	Not applicable
DNAJA2	DnaJ homolog subfamily A member 2	O60884	0	0	0	1	TRUE	0	0	0	1
DNAJA4	DnaJ homolog subfamily A member 4	Q8WW22	0	0	0	1	FALSE	Not applicable	Not applicable	Not applicable	Not applicable
DNAJB1	DnaJ homolog subfamily B member 1	P25685	0	0	0	1	TRUE	0	0	0	1
DNAJB14	DnaJ homolog subfamily B member 14	Q8TBM8	0	0	0	1	FALSE	Not applicable	Not applicable	Not applicable	Not applicable
DNAJB2	DnaJ homolog subfamily B member 2	P25686	0	0	0	1	FALSE	Not applicable	Not applicable	Not applicable	Not applicable
DNAJB6	DnaJ homolog subfamily B member 6	O75190	0	0	0	1	FALSE	Not applicable	Not applicable	Not applicable	Not applicable
DNAJB8	DnaJ homolog subfamily B member 8	Q8NHS0	0	0	0	1	TRUE	0	0	0	1
DNAJC21	DnaJ homolog subfamily C member 21	Q5F1R6	0	0	0	1	FALSE	Not applicable	Not applicable	Not applicable	Not applicable
DNAJC6	Putative tyrosine-protein phosphatase auxilin	O75061	0	0	0	1	FALSE	Not applicable	Not applicable	Not applicable	Not applicable
DNAJC9	DnaJ homolog subfamily C member 9	Q8WXX5	0	0	0	1	FALSE	Not applicable	Not applicable	Not applicable	Not applicable
DNER	Delta and Notch-like epidermal growth factor-related receptor	Q8NFT8	0	1	0	1	TRUE	0	1	0	1
DNLZ	DNL-type zinc finger protein	Q5SXM8	0	0	0	1	FALSE	Not applicable	Not applicable	Not applicable	Not applicable
DNM1	Dynamin-1	Q05193	0	0	0	1	FALSE	Not applicable	Not applicable	Not applicable	Not applicable
DNM3	Dynamin-3	Q9UQ16	0	0	0	1	FALSE	Not applicable	Not applicable	Not applicable	Not applicable
DNMBP	Dynamin-binding protein	Q6XZF7	0	0	0	1	TRUE	0	0	0	1
DNPEP	Aspartyl aminopeptidase	Q9ULA0	0	0	0	1	FALSE	Not applicable	Not applicable	Not applicable	Not applicable
DNPH1	2'-deoxynucleoside 5'-phosphate N-hydrolase 1	O43598	0	0	1	1	TRUE	0	0	1	1
DOC2B	Double C2-like domain-containing protein beta	Q14184	0	0	0	1	FALSE	Not applicable	Not applicable	Not applicable	Not applicable
DOCK9	Dedicator of cytokinesis protein 9	Q9BZ29	0	0	0	1	FALSE	Not applicable	Not applicable	Not applicable	Not applicable
DOK1	Docking protein 1	Q99704	0	0	0	1	FALSE	Not applicable	Not applicable	Not applicable	Not applicable
DOK2	Docking protein 2	O60496	0	0	0	1	TRUE	0	0	0	1
DPEP1	Dipeptidase 1	P16444	0	0	0	1	TRUE	0	0	0	1
DPEP2	Dipeptidase 2	Q9H4A9	0	0	0	1	TRUE	0	0	0	1
DPP10	Inactive dipeptidyl peptidase 10	Q8N608	0	1	1	1	TRUE	0	1	1	1
DPP4	Dipeptidyl peptidase 4	P27487	0	1	0	1	TRUE	0	1	0	1
DPP6	Dipeptidyl aminopeptidase-like protein 6	P42658	0	0	1	1	TRUE	0	0	1	1
DPP7	Dipeptidyl peptidase 2	Q9UHL4	0	0	0	1	TRUE	0	0	0	1
DPT	Dermatopontin	Q07507	1	0	0	1	TRUE	1	0	0	1
DPY30	Protein dpy-30 homolog	Q9C005	0	0	1	1	TRUE	0	0	1	1
DRAXIN	Draxin	Q8NBI3	0	0	0	1	TRUE	0	0	0	1
DRG2	Developmentally-regulated GTP-binding protein 2	P55039	0	0	0	1	TRUE	0	0	0	1
DSC2	Desmocollin-2	Q02487	0	0	0	1	TRUE	0	0	0	1
DSCAM	Down syndrome cell adhesion molecule	O60469	0	0	0	1	FALSE	Not applicable	Not applicable	Not applicable	Not applicable
DSG2	Desmoglein-2	Q14126	0	0	1	1	TRUE	0	0	1	1
DSG3	Desmoglein-3	P32926	0	0	1	1	TRUE	0	0	1	1
DSG4	Desmoglein-4	Q86SJ6	0	0	0	1	TRUE	0	0	0	1
DTD1	D-aminoacyl-tRNA deacylase 1	Q8TEA8	0	0	0	1	FALSE	Not applicable	Not applicable	Not applicable	Not applicable
DTNB	Dystrobrevin beta	O60941	0	0	0	1	FALSE	Not applicable	Not applicable	Not applicable	Not applicable
DTX2	Probable E3 ubiquitin-protein ligase DTX2	Q86UW9	0	0	1	1	FALSE	Not applicable	Not applicable	Not applicable	Not applicable
DTX3	Probable E3 ubiquitin-protein ligase DTX3	Q8N9I9	0	0	0	1	TRUE	0	0	0	1
DTYMK	Thymidylate kinase	P23919	0	0	1	1	FALSE	Not applicable	Not applicable	Not applicable	Not applicable
DUOX2	Dual oxidase 2	Q9NRD8	0	0	0	1	TRUE	0	0	0	1
DUSP13	Dual specificity protein phosphatase 13 isoform A	Q6B8I1	0	0	0	1	FALSE	Not applicable	Not applicable	Not applicable	Not applicable
DUSP29	Dual specificity phosphatase 29	Q68J44	0	0	0	1	FALSE	Not applicable	Not applicable	Not applicable	Not applicable
DUSP3	Dual specificity protein phosphatase 3	P51452	0	0	0	1	TRUE	0	0	0	1
DUT	Deoxyuridine 5'-triphosphate nucleotidohydrolase, mitochondrial	P33316	0	0	0	1	FALSE	Not applicable	Not applicable	Not applicable	Not applicable
DXO	Decapping and exoribonuclease protein	O77932	0	0	0	1	FALSE	Not applicable	Not applicable	Not applicable	Not applicable
DYNC1H1	Cytoplasmic dynein 1 heavy chain 1	Q14204	0	0	0	1	FALSE	Not applicable	Not applicable	Not applicable	Not applicable
DYNLT1	Dynein light chain Tctex-type 1	P63172	0	0	0	1	FALSE	Not applicable	Not applicable	Not applicable	Not applicable
DYNLT3	Dynein light chain Tctex-type 3	P51808	0	0	0	1	FALSE	Not applicable	Not applicable	Not applicable	Not applicable
EBAG9	Receptor-binding cancer antigen expressed on SiSo cells	O00559	0	1	0	1	TRUE	0	1	0	1
EBI3_IL27	Interleukin-27	Q14213_Q8NEV9	0	0	0	1	TRUE	0	0	0	1
ECE1	Endothelin-converting enzyme 1	P42892	0	1	0	1	TRUE	0	1	0	1
ECHDC3	Enoyl-CoA hydratase domain-containing protein 3, mitochondrial	Q96DC8	0	0	0	1	FALSE	Not applicable	Not applicable	Not applicable	Not applicable
ECHS1	Enoyl-CoA hydratase, mitochondrial	P30084	0	0	1	1	FALSE	Not applicable	Not applicable	Not applicable	Not applicable
ECI2	Enoyl-CoA delta isomerase 2	O75521	0	0	0	1	FALSE	Not applicable	Not applicable	Not applicable	Not applicable
ECM1	Extracellular matrix protein 1	Q16610	0	0	0	1	FALSE	Not applicable	Not applicable	Not applicable	Not applicable
ECSCR	Endothelial cell-specific chemotaxis regulator	Q19T08	0	1	0	1	FALSE	Not applicable	Not applicable	Not applicable	Not applicable
EDA2R	Tumor necrosis factor receptor superfamily member 27	Q9HAV5	1	1	0	1	TRUE	1	1	0	1
EDAR	Tumor necrosis factor receptor superfamily member EDAR	Q9UNE0	0	0	0	1	TRUE	0	0	0	1
EDDM3B	Epididymal secretory protein E3-beta	P56851	0	0	0	1	FALSE	Not applicable	Not applicable	Not applicable	Not applicable
EDEM2	ER degradation-enhancing alpha-mannosidase-like protein 2	Q9BV94	0	0	0	1	FALSE	Not applicable	Not applicable	Not applicable	Not applicable
EDF1	Endothelial differentiation-related factor 1	O60869	0	0	0	1	FALSE	Not applicable	Not applicable	Not applicable	Not applicable
EDIL3	EGF-like repeat and discoidin I-like domain-containing protein 3	O43854	1	0	0	1	TRUE	1	0	0	1
EDN1	Endothelin-1	P05305	0	1	1	1	FALSE	Not applicable	Not applicable	Not applicable	Not applicable
EDNRB	Endothelin receptor type B	P24530	0	1	0	1	FALSE	Not applicable	Not applicable	Not applicable	Not applicable
EEF1D	Elongation factor 1-delta	P29692	0	0	1	1	FALSE	Not applicable	Not applicable	Not applicable	Not applicable
EFCAB14	EF-hand calcium-binding domain-containing protein 14	O75071	0	0	0	1	FALSE	Not applicable	Not applicable	Not applicable	Not applicable
EFCAB2	Dynein regulatory complex protein 8	Q5VUJ9	0	0	0	1	FALSE	Not applicable	Not applicable	Not applicable	Not applicable
EFEMP1	EGF-containing fibulin-like extracellular matrix protein 1	Q12805	1	0	1	1	TRUE	1	0	1	1
EFHD1	EF-hand domain-containing protein D1	Q9BUP0	1	0	0	1	FALSE	Not applicable	Not applicable	Not applicable	Not applicable
EFNA1	Ephrin-A1	P20827	0	0	0	1	TRUE	0	0	0	1
EFNA4	Ephrin-A4	P52798	0	0	0	1	TRUE	0	0	0	1
EFNB2	Ephrin-B2	P52799	0	0	0	1	FALSE	Not applicable	Not applicable	Not applicable	Not applicable
EGF	Pro-epidermal growth factor	P01133	0	1	0	1	TRUE	0	1	0	1
EGFL7	Epidermal growth factor-like protein 7	Q9UHF1	0	0	0	1	TRUE	0	0	0	1
EGFLAM	Pikachurin	Q63HQ2	0	0	0	1	FALSE	Not applicable	Not applicable	Not applicable	Not applicable
EGFR	Epidermal growth factor receptor	P00533	0	1	0	1	TRUE	0	1	0	1
EGLN1	Egl nine homolog 1	Q9GZT9	0	0	0	1	TRUE	0	0	0	1
EHBP1	EH domain-binding protein 1	Q8NDI1	0	0	0	1	FALSE	Not applicable	Not applicable	Not applicable	Not applicable
EHD3	EH domain-containing protein 3	Q9NZN3	0	0	0	1	FALSE	Not applicable	Not applicable	Not applicable	Not applicable
EIF1AX	Eukaryotic translation initiation factor 1A, X-chromosomal	P47813	0	0	0	1	FALSE	Not applicable	Not applicable	Not applicable	Not applicable
EIF2AK2	Interferon-induced, double-stranded RNA-activated protein kinase	P19525	0	0	0	1	FALSE	Not applicable	Not applicable	Not applicable	Not applicable
EIF2AK3	Eukaryotic translation initiation factor 2-alpha kinase 3	Q9NZJ5	0	1	0	1	FALSE	Not applicable	Not applicable	Not applicable	Not applicable
EIF2S2	Eukaryotic translation initiation factor 2 subunit 2	P20042	0	0	0	1	FALSE	Not applicable	Not applicable	Not applicable	Not applicable
EIF4B	Eukaryotic translation initiation factor 4B	P23588	0	0	0	1	TRUE	0	0	0	1
EIF4E	Eukaryotic translation initiation factor 4E	P06730	0	0	0	1	FALSE	Not applicable	Not applicable	Not applicable	Not applicable
EIF4EBP1	Eukaryotic translation initiation factor 4E-binding protein 1	Q13541	0	0	0	1	TRUE	0	0	0	1
EIF4G1	Eukaryotic translation initiation factor 4 gamma 1	Q04637	0	1	1	1	TRUE	0	1	1	1
EIF4G3	Eukaryotic translation initiation factor 4 gamma 3	O43432	0	0	0	1	FALSE	Not applicable	Not applicable	Not applicable	Not applicable
EIF5	Eukaryotic translation initiation factor 5	P55010	0	0	0	1	FALSE	Not applicable	Not applicable	Not applicable	Not applicable
EIF5A	Eukaryotic translation initiation factor 5A-1	P63241	0	0	0	1	TRUE	0	0	0	1
ELAC1	Zinc phosphodiesterase ELAC protein 1	Q9H777	0	0	0	1	FALSE	Not applicable	Not applicable	Not applicable	Not applicable
ELAVL4	ELAV-like protein 4	P26378	0	0	0	1	FALSE	Not applicable	Not applicable	Not applicable	Not applicable
ELN	Elastin	P15502	1	1	0	1	FALSE	Not applicable	Not applicable	Not applicable	Not applicable
ELOA	Elongin-A	Q14241	0	0	0	1	TRUE	0	0	0	1
ELOB	Elongin-B	Q15370	0	0	0	1	FALSE	Not applicable	Not applicable	Not applicable	Not applicable
ENAH	Protein enabled homolog	Q8N8S7	1	0	0	1	TRUE	1	0	0	1
ENDOU	Poly(U)-specific endoribonuclease	P21128	0	0	0	1	FALSE	Not applicable	Not applicable	Not applicable	Not applicable
ENG	Endoglin	P17813	0	1	1	1	TRUE	0	1	1	1
ENO1	Alpha-enolase	P06733	0	0	0	1	TRUE	0	0	0	1
ENO2	Gamma-enolase	P09104	0	0	0	1	TRUE	0	0	0	1
ENO3	Beta-enolase	P13929	0	0	0	1	FALSE	Not applicable	Not applicable	Not applicable	Not applicable
ENOPH1	Enolase-phosphatase E1	Q9UHY7	0	0	0	1	FALSE	Not applicable	Not applicable	Not applicable	Not applicable
ENOX2	Ecto-NOX disulfide-thiol exchanger 2	Q16206	0	0	0	1	FALSE	Not applicable	Not applicable	Not applicable	Not applicable
ENPEP	Glutamyl aminopeptidase	Q07075	0	0	0	1	FALSE	Not applicable	Not applicable	Not applicable	Not applicable
ENPP2	Ectonucleotide pyrophosphatase/phosphodiesterase family member 2	Q13822	0	0	1	1	TRUE	0	0	1	1
ENPP5	Ectonucleotide pyrophosphatase/phosphodiesterase family member 5	Q9UJA9	0	0	1	1	TRUE	0	0	1	1
ENPP6	Glycerophosphocholine cholinephosphodiesterase ENPP6	Q6UWR7	0	0	1	1	FALSE	Not applicable	Not applicable	Not applicable	Not applicable
ENPP7	Ectonucleotide pyrophosphatase/phosphodiesterase family member 7	Q6UWV6	0	1	0	1	TRUE	0	1	0	1
ENSA	Alpha-endosulfine	O43768	0	0	0	1	FALSE	Not applicable	Not applicable	Not applicable	Not applicable
ENTPD2	Ectonucleoside triphosphate diphosphohydrolase 2	Q9Y5L3	0	0	0	1	TRUE	0	0	0	1
ENTPD5	Ectonucleoside triphosphate diphosphohydrolase 5	O75356	0	0	0	1	TRUE	0	0	0	1
ENTPD6	Ectonucleoside triphosphate diphosphohydrolase 6	O75354	0	0	0	1	TRUE	0	0	0	1
ENTR1	Endosome-associated-trafficking regulator 1	Q96C92	0	0	0	1	FALSE	Not applicable	Not applicable	Not applicable	Not applicable
EP300	Histone acetyltransferase p300	Q09472	0	1	0	1	FALSE	Not applicable	Not applicable	Not applicable	Not applicable
EPB41L5	Band 4.1-like protein 5	Q9HCM4	0	0	1	1	FALSE	Not applicable	Not applicable	Not applicable	Not applicable
EPCAM	Epithelial cell adhesion molecule	P16422	0	0	0	1	TRUE	0	0	0	1
EPGN	Epigen	Q6UW88	0	0	0	1	FALSE	Not applicable	Not applicable	Not applicable	Not applicable
EPHA1	Ephrin type-A receptor 1	P21709	0	0	0	1	TRUE	0	0	0	1
EPHA10	Ephrin type-A receptor 10	Q5JZY3	0	0	0	1	TRUE	0	0	0	1
EPHA2	Ephrin type-A receptor 2	P29317	0	1	1	1	TRUE	0	1	1	1
EPHA4	Ephrin type-A receptor 4	P54764	0	0	1	1	FALSE	Not applicable	Not applicable	Not applicable	Not applicable
EPHB4	Ephrin type-B receptor 4	P54760	0	0	1	1	TRUE	0	0	1	1
EPHB6	Ephrin type-B receptor 6	O15197	0	0	0	1	TRUE	0	0	0	1
EPHX2	Bifunctional epoxide hydrolase 2	P34913	0	1	0	1	TRUE	0	1	0	1
EPN1	Epsin-1	Q9Y6I3	0	0	0	1	FALSE	Not applicable	Not applicable	Not applicable	Not applicable
EPO	Erythropoietin	P01588	0	1	0	1	TRUE	0	1	0	1
EPPK1	Epiplakin	P58107	0	0	0	1	FALSE	Not applicable	Not applicable	Not applicable	Not applicable
EPS8L2	Epidermal growth factor receptor kinase substrate 8-like protein 2	Q9H6S3	0	0	0	1	TRUE	0	0	0	1
ERBB2	Receptor tyrosine-protein kinase erbB-2	P04626	0	0	0	1	TRUE	0	0	0	1
ERBB3	Receptor tyrosine-protein kinase erbB-3	P21860	0	0	0	1	TRUE	0	0	0	1
ERBB4	Receptor tyrosine-protein kinase erbB-4	Q15303	1	0	1	1	TRUE	1	0	1	1
ERBIN	Erbin	Q96RT1	0	0	0	1	TRUE	0	0	0	1
ERC2	ERC protein 2	O15083	0	0	0	1	FALSE	Not applicable	Not applicable	Not applicable	Not applicable
ERCC1	DNA excision repair protein ERCC-1	P07992	0	0	0	1	FALSE	Not applicable	Not applicable	Not applicable	Not applicable
EREG	Proepiregulin	O14944	0	0	0	1	TRUE	0	0	0	1
ERI1	3'-5' exoribonuclease 1	Q8IV48	0	0	0	1	FALSE	Not applicable	Not applicable	Not applicable	Not applicable
ERMAP	Erythroid membrane-associated protein	Q96PL5	0	0	0	1	FALSE	Not applicable	Not applicable	Not applicable	Not applicable
ERN1	Serine/threonine-protein kinase/endoribonuclease IRE1	O75460	0	1	0	1	FALSE	Not applicable	Not applicable	Not applicable	Not applicable
ERP29	Endoplasmic reticulum resident protein 29	P30040	0	0	0	1	FALSE	Not applicable	Not applicable	Not applicable	Not applicable
ERP44	Endoplasmic reticulum resident protein 44	Q9BS26	0	0	0	1	TRUE	0	0	0	1
ERVV-1	Endogenous retrovirus group V member 1 Env polyprotein	B6SEH8	0	0	0	1	FALSE	Not applicable	Not applicable	Not applicable	Not applicable
ESAM	Endothelial cell-selective adhesion molecule	Q96AP7	1	1	0	1	TRUE	1	1	0	1
ESM1	Endothelial cell-specific molecule 1	Q9NQ30	1	0	0	1	TRUE	1	0	0	1
ESPL1	Separin	Q14674	0	0	0	1	FALSE	Not applicable	Not applicable	Not applicable	Not applicable
ESR1	Estrogen receptor	P03372	0	1	0	1	FALSE	Not applicable	Not applicable	Not applicable	Not applicable
ESYT2	Extended synaptotagmin-2	A0FGR8	0	0	0	1	FALSE	Not applicable	Not applicable	Not applicable	Not applicable
EVI2B	Protein EVI2B	P34910	0	0	0	1	FALSE	Not applicable	Not applicable	Not applicable	Not applicable
EVI5	Ecotropic viral integration site 5 protein homolog	O60447	0	0	1	1	FALSE	Not applicable	Not applicable	Not applicable	Not applicable
EVPL	Envoplakin	Q92817	0	1	0	1	FALSE	Not applicable	Not applicable	Not applicable	Not applicable
EXOSC10	Exosome component 10	Q01780	0	0	0	1	FALSE	Not applicable	Not applicable	Not applicable	Not applicable
EXTL1	Exostosin-like 1	Q92935	0	0	0	1	FALSE	Not applicable	Not applicable	Not applicable	Not applicable
EZR	Ezrin	P15311	0	0	0	1	TRUE	0	0	0	1
F10	Coagulation factor X	P00742	0	0	0	1	FALSE	Not applicable	Not applicable	Not applicable	Not applicable
F11	Coagulation factor XI	P03951	0	0	0	1	FALSE	Not applicable	Not applicable	Not applicable	Not applicable
F11R	Junctional adhesion molecule A	Q9Y624	0	1	1	1	TRUE	0	1	1	1
F12	Coagulation factor XII	P00748	0	0	0	1	FALSE	Not applicable	Not applicable	Not applicable	Not applicable
F13B	Coagulation factor XIII B chain	P05160	0	0	0	1	FALSE	Not applicable	Not applicable	Not applicable	Not applicable
F2	Prothrombin	P00734	1	1	0	1	FALSE	Not applicable	Not applicable	Not applicable	Not applicable
F2R	Proteinase-activated receptor 1	P25116	1	1	0	1	TRUE	1	1	0	1
F3	Tissue factor	P13726	0	1	1	1	TRUE	0	1	1	1
F7	Coagulation factor VII	P08709	0	1	0	1	TRUE	0	1	0	1
F9	Coagulation factor IX	P00740	0	0	1	1	TRUE	0	0	1	1
FABP1	Fatty acid-binding protein, liver	P07148	0	0	0	1	TRUE	0	0	0	1
FABP2	Fatty acid-binding protein, intestinal	P12104	0	1	0	1	TRUE	0	1	0	1
FABP3	Fatty acid-binding protein, heart	P05413	1	0	0	1	FALSE	Not applicable	Not applicable	Not applicable	Not applicable
FABP4	Fatty acid-binding protein, adipocyte	P15090	0	1	0	1	TRUE	0	1	0	1
FABP5	Fatty acid-binding protein 5	Q01469	0	1	0	1	TRUE	0	1	0	1
FABP6	Gastrotropin	P51161	0	0	0	1	TRUE	0	0	0	1
FABP9	Fatty acid-binding protein 9	Q0Z7S8	0	0	0	1	TRUE	0	0	0	1
FADD	FAS-associated death domain protein	Q13158	0	0	0	1	TRUE	0	0	0	1
FAM13A	Protein FAM13A	O94988	0	0	0	1	FALSE	Not applicable	Not applicable	Not applicable	Not applicable
FAM171A2	Protein FAM171A2	A8MVW0	0	0	0	1	FALSE	Not applicable	Not applicable	Not applicable	Not applicable
FAM171B	Protein FAM171B	Q6P995	0	0	0	1	FALSE	Not applicable	Not applicable	Not applicable	Not applicable
FAM172A	Cotranscriptional regulator FAM172A	Q8WUF8	0	0	0	1	FALSE	Not applicable	Not applicable	Not applicable	Not applicable
FAM20A	Pseudokinase FAM20A	Q96MK3	0	1	1	1	FALSE	Not applicable	Not applicable	Not applicable	Not applicable
FAM3B	Protein FAM3B	P58499	0	0	0	1	TRUE	0	0	0	1
FAM3C	Protein FAM3C	Q92520	0	0	0	1	TRUE	0	0	0	1
FAM3D	Protein FAM3D	Q96BQ1	0	0	0	1	FALSE	Not applicable	Not applicable	Not applicable	Not applicable
FAP	Prolyl endopeptidase FAP	Q12884	1	0	0	1	TRUE	1	0	0	1
FARSA	Phenylalanine--tRNA ligase alpha subunit	Q9Y285	0	0	0	1	FALSE	Not applicable	Not applicable	Not applicable	Not applicable
FAS	Tumor necrosis factor receptor superfamily member 6	P25445	0	1	0	1	TRUE	0	1	0	1
FASLG	Tumor necrosis factor ligand superfamily member 6	P48023	0	1	0	1	TRUE	0	1	0	1
FBLN2	Fibulin-2	P98095	0	0	1	1	FALSE	Not applicable	Not applicable	Not applicable	Not applicable
FBN2	Fibrillin-2	P35556	0	1	0	1	FALSE	Not applicable	Not applicable	Not applicable	Not applicable
FBP1	Fructose-1,6-bisphosphatase 1	P09467	0	0	0	1	TRUE	0	0	0	1
FCAMR	High affinity immunoglobulin alpha and immunoglobulin mu Fc receptor	Q8WWV6	0	0	0	1	FALSE	Not applicable	Not applicable	Not applicable	Not applicable
FCAR	Immunoglobulin alpha Fc receptor	P24071	0	0	0	1	TRUE	0	0	0	1
FCER1A	High affinity immunoglobulin epsilon receptor subunit alpha	P12319	0	0	0	1	FALSE	Not applicable	Not applicable	Not applicable	Not applicable
FCER2	Low affinity immunoglobulin epsilon Fc receptor	P06734	0	0	0	1	TRUE	0	0	0	1
FCGR2A	Low affinity immunoglobulin gamma Fc region receptor II-a	P12318	0	1	0	1	TRUE	0	1	0	1
FCGR2B	Low affinity immunoglobulin gamma Fc region receptor II-b	P31994	0	0	0	1	TRUE	0	0	0	1
FCGR3B	Low affinity immunoglobulin gamma Fc region receptor III-B	O75015	0	1	0	1	TRUE	0	1	0	1
FCN1	Ficolin-1	O00602	0	0	0	1	FALSE	Not applicable	Not applicable	Not applicable	Not applicable
FCN2	Ficolin-2	Q15485	0	0	0	1	TRUE	0	0	0	1
FCRL1	Fc receptor-like protein 1	Q96LA6	0	0	0	1	TRUE	0	0	0	1
FCRL2	Fc receptor-like protein 2	Q96LA5	0	0	0	1	TRUE	0	0	0	1
FCRL3	Fc receptor-like protein 3	Q96P31	0	0	0	1	TRUE	0	0	0	1
FCRL5	Fc receptor-like protein 5	Q96RD9	0	0	0	1	TRUE	0	0	0	1
FCRL6	Fc receptor-like protein 6	Q6DN72	0	1	0	1	TRUE	0	1	0	1
FCRLB	Fc receptor-like B	Q6BAA4	0	0	1	1	TRUE	0	0	1	1
FDX1	Adrenodoxin, mitochondrial	P10109	0	0	0	1	FALSE	Not applicable	Not applicable	Not applicable	Not applicable
FDX2	Ferredoxin-2, mitochondrial	Q6P4F2	0	0	0	1	FALSE	Not applicable	Not applicable	Not applicable	Not applicable
FEN1	Flap endonuclease 1	P39748	0	0	0	1	TRUE	0	0	0	1
FES	Tyrosine-protein kinase Fes/Fps	P07332	0	0	0	1	TRUE	0	0	0	1
FETUB	Fetuin-B	Q9UGM5	0	0	0	1	TRUE	0	0	0	1
FGA	Fibrinogen alpha chain	P02671	0	1	1	1	FALSE	Not applicable	Not applicable	Not applicable	Not applicable
FGD3	FYVE, RhoGEF and PH domain-containing protein 3	Q5JSP0	0	0	0	1	FALSE	Not applicable	Not applicable	Not applicable	Not applicable
FGF12	Fibroblast growth factor 12	P61328	0	0	0	1	FALSE	Not applicable	Not applicable	Not applicable	Not applicable
FGF16	Fibroblast growth factor 16	O43320	1	0	0	1	FALSE	Not applicable	Not applicable	Not applicable	Not applicable
FGF19	Fibroblast growth factor 19	O95750	0	0	0	1	TRUE	0	0	0	1
FGF2	Fibroblast growth factor 2	P09038	0	1	1	1	TRUE	0	1	1	1
FGF20	Fibroblast growth factor 20	Q9NP95	0	0	0	1	FALSE	Not applicable	Not applicable	Not applicable	Not applicable
FGF21	Fibroblast growth factor 21	Q9NSA1	0	0	0	1	TRUE	0	0	0	1
FGF23	Fibroblast growth factor 23	Q9GZV9	0	1	0	1	TRUE	0	1	0	1
FGF3	Fibroblast growth factor 3	P11487	0	0	0	1	FALSE	Not applicable	Not applicable	Not applicable	Not applicable
FGF5	Fibroblast growth factor 5	P12034	0	0	0	1	TRUE	0	0	0	1
FGF6	Fibroblast growth factor 6	P10767	0	0	0	1	FALSE	Not applicable	Not applicable	Not applicable	Not applicable
FGF7	Fibroblast growth factor 7	P21781	1	1	0	1	FALSE	Not applicable	Not applicable	Not applicable	Not applicable
FGF9	Fibroblast growth factor 9	P31371	0	0	0	1	FALSE	Not applicable	Not applicable	Not applicable	Not applicable
FGFBP1	Fibroblast growth factor-binding protein 1	Q14512	0	0	0	1	TRUE	0	0	0	1
FGFBP2	Fibroblast growth factor-binding protein 2	Q9BYJ0	0	0	0	1	FALSE	Not applicable	Not applicable	Not applicable	Not applicable
FGFBP3	Fibroblast growth factor-binding protein 3	Q8TAT2	0	0	1	1	FALSE	Not applicable	Not applicable	Not applicable	Not applicable
FGFR2	Fibroblast growth factor receptor 2	P21802	0	0	0	1	TRUE	0	0	0	1
FGFR4	Fibroblast growth factor receptor 4	P22455	0	0	0	1	FALSE	Not applicable	Not applicable	Not applicable	Not applicable
FGL1	Fibrinogen-like protein 1	Q08830	0	1	1	1	FALSE	Not applicable	Not applicable	Not applicable	Not applicable
FGR	Tyrosine-protein kinase Fgr	P09769	0	0	0	1	TRUE	0	0	0	1
FH	Fumarate hydratase, mitochondrial	P07954	0	0	0	1	FALSE	Not applicable	Not applicable	Not applicable	Not applicable
FHIP2A	FHF complex subunit HOOK interacting protein 2A	Q5W0V3	0	0	0	1	FALSE	Not applicable	Not applicable	Not applicable	Not applicable
FHIT	Bis(5'-adenosyl)-triphosphatase	P49789	0	0	0	1	TRUE	0	0	0	1
FIS1	Mitochondrial fission 1 protein	Q9Y3D6	0	0	0	1	TRUE	0	0	0	1
FKBP14	Peptidyl-prolyl cis-trans isomerase FKBP14	Q9NWM8	0	0	0	1	FALSE	Not applicable	Not applicable	Not applicable	Not applicable
FKBP1B	Peptidyl-prolyl cis-trans isomerase FKBP1B	P68106	0	0	0	1	TRUE	0	0	0	1
FKBP4	Peptidyl-prolyl cis-trans isomerase FKBP4	Q02790	0	0	0	1	TRUE	0	0	0	1
FKBP5	Peptidyl-prolyl cis-trans isomerase FKBP5	Q13451	0	0	0	1	TRUE	0	0	0	1
FKBP7	Peptidyl-prolyl cis-trans isomerase FKBP7	Q9Y680	1	0	0	1	TRUE	1	0	0	1
FKBPL	FK506-binding protein-like	Q9UIM3	0	0	0	1	FALSE	Not applicable	Not applicable	Not applicable	Not applicable
FLI1	Friend leukemia integration 1 transcription factor	Q01543	0	0	0	1	TRUE	0	0	0	1
FLRT2	Leucine-rich repeat transmembrane protein FLRT2	O43155	0	1	1	1	TRUE	0	1	1	1
FLT1	Vascular endothelial growth factor receptor 1	P17948	0	1	0	1	TRUE	0	1	0	1
FLT3	Receptor-type tyrosine-protein kinase FLT3	P36888	0	1	1	1	TRUE	0	1	1	1
FLT3LG	Fms-related tyrosine kinase 3 ligand	P49771	0	0	0	1	TRUE	0	0	0	1
FLT4	Vascular endothelial growth factor receptor 3	P35916	0	1	0	1	TRUE	0	1	0	1
FMNL1	Formin-like protein 1	O95466	0	0	1	1	TRUE	0	0	1	1
FMR1	Synaptic functional regulator FMR1	Q06787	0	0	0	1	TRUE	0	0	0	1
FN1	Fibronectin	P02751	1	1	0	1	FALSE	Not applicable	Not applicable	Not applicable	Not applicable
FNDC1	Fibronectin type III domain-containing protein 1	Q4ZHG4	1	1	0	1	FALSE	Not applicable	Not applicable	Not applicable	Not applicable
FNTA	Protein farnesyltransferase/geranylgeranyltransferase type-1 subunit alpha	P49354	0	0	0	1	FALSE	Not applicable	Not applicable	Not applicable	Not applicable
FOLH1	Glutamate carboxypeptidase 2	Q04609	0	0	0	1	FALSE	Not applicable	Not applicable	Not applicable	Not applicable
FOLR1	Folate receptor alpha	P15328	0	0	0	1	TRUE	0	0	0	1
FOLR2	Folate receptor beta	P14207	0	0	0	1	TRUE	0	0	0	1
FOLR3	Folate receptor gamma	P41439	0	0	0	1	TRUE	0	0	0	1
FOS	Proto-oncogene c-Fos	P01100	0	1	0	1	FALSE	Not applicable	Not applicable	Not applicable	Not applicable
FOSB	Protein fosB	P53539	0	0	0	1	TRUE	0	0	0	1
FOXJ3	Forkhead box protein J3	Q9UPW0	0	1	0	1	FALSE	Not applicable	Not applicable	Not applicable	Not applicable
FOXO1	Forkhead box protein O1	Q12778	0	1	0	1	TRUE	0	1	0	1
FOXO3	Forkhead box protein O3	O43524	0	1	0	1	TRUE	0	1	0	1
FRMD4B	FERM domain-containing protein 4B	Q9Y2L6	0	0	0	1	FALSE	Not applicable	Not applicable	Not applicable	Not applicable
FRMD7	FERM domain-containing protein 7	Q6ZUT3	1	0	0	1	FALSE	Not applicable	Not applicable	Not applicable	Not applicable
FRZB	Secreted frizzled-related protein 3	Q92765	1	0	0	1	TRUE	1	0	0	1
FSHB	Follitropin subunit beta	P01225	0	0	0	1	FALSE	Not applicable	Not applicable	Not applicable	Not applicable
FST	Follistatin	P19883	1	1	0	1	TRUE	1	1	0	1
FSTL1	Follistatin-related protein 1	Q12841	1	1	1	1	FALSE	Not applicable	Not applicable	Not applicable	Not applicable
FSTL3	Follistatin-related protein 3	O95633	0	0	0	1	TRUE	0	0	0	1
FTCD	Formimidoyltransferase-cyclodeaminase	O95954	0	0	0	1	FALSE	Not applicable	Not applicable	Not applicable	Not applicable
FUCA1	Tissue alpha-L-fucosidase	P04066	0	0	0	1	TRUE	0	0	0	1
FUOM	Fucose mutarotase	A2VDF0	0	0	0	1	FALSE	Not applicable	Not applicable	Not applicable	Not applicable
FURIN	Furin	P09958	0	1	0	1	TRUE	0	1	0	1
FUS	RNA-binding protein FUS	P35637	0	0	0	1	TRUE	0	0	0	1
FUT1	Galactoside alpha-(1,2)-fucosyltransferase 1	P19526	0	0	0	1	FALSE	Not applicable	Not applicable	Not applicable	Not applicable
FUT3_FUT5	3-galactosyl-N-acetylglucosaminide 4-alpha-L-fucosyltransferase FUT3_4-galactosyl-N-acetylglucosaminide 3-alpha-L-fucosyltransferase FUT5	P21217_Q11128	0	0	0	1	TRUE	0	0	0	1
FUT8	Alpha-(1,6)-fucosyltransferase	Q9BYC5	0	1	0	1	TRUE	0	1	0	1
FXN	Frataxin, mitochondrial	Q16595	0	0	0	1	TRUE	0	0	0	1
FXYD5	FXYD domain-containing ion transport regulator 5	Q96DB9	0	0	0	1	TRUE	0	0	0	1
FYB1	FYN-binding protein 1	O15117	0	0	0	1	TRUE	0	0	0	1
FZD10	Frizzled-10	Q9ULW2	0	0	0	1	FALSE	Not applicable	Not applicable	Not applicable	Not applicable
FZD8	Frizzled-8	Q9H461	0	0	0	1	FALSE	Not applicable	Not applicable	Not applicable	Not applicable
GABARAP	Gamma-aminobutyric acid receptor-associated protein	O95166	0	0	0	1	FALSE	Not applicable	Not applicable	Not applicable	Not applicable
GABARAPL1	Gamma-aminobutyric acid receptor-associated protein-like 1	Q9H0R8	0	0	0	1	FALSE	Not applicable	Not applicable	Not applicable	Not applicable
GABRA4	Gamma-aminobutyric acid receptor subunit alpha-4	P48169	1	1	0	1	FALSE	Not applicable	Not applicable	Not applicable	Not applicable
GAD1	Glutamate decarboxylase 1	Q99259	1	0	0	1	FALSE	Not applicable	Not applicable	Not applicable	Not applicable
GAD2	Glutamate decarboxylase 2	Q05329	0	0	1	1	FALSE	Not applicable	Not applicable	Not applicable	Not applicable
GADD45B	Growth arrest and DNA damage-inducible protein GADD45 beta	O75293	1	0	0	1	FALSE	Not applicable	Not applicable	Not applicable	Not applicable
GADD45GIP1	Growth arrest and DNA damage-inducible proteins-interacting protein 1	Q8TAE8	0	0	0	1	FALSE	Not applicable	Not applicable	Not applicable	Not applicable
GAGE2A	G antigen 2A	Q6NT46	0	0	0	1	FALSE	Not applicable	Not applicable	Not applicable	Not applicable
GAL	Galanin peptides	P22466	0	0	0	1	TRUE	0	0	0	1
GALNT10	Polypeptide N-acetylgalactosaminyltransferase 10	Q86SR1	0	0	0	1	TRUE	0	0	0	1
GALNT2	Polypeptide N-acetylgalactosaminyltransferase 2	Q10471	0	0	0	1	TRUE	0	0	0	1
GALNT3	Polypeptide N-acetylgalactosaminyltransferase 3	Q14435	0	0	0	1	TRUE	0	0	0	1
GALNT5	Polypeptide N-acetylgalactosaminyltransferase 5	Q7Z7M9	1	1	0	1	FALSE	Not applicable	Not applicable	Not applicable	Not applicable
GALNT7	N-acetylgalactosaminyltransferase 7	Q86SF2	0	0	1	1	TRUE	0	0	1	1
GAMT	Guanidinoacetate N-methyltransferase	Q14353	0	0	0	1	FALSE	Not applicable	Not applicable	Not applicable	Not applicable
GAPDH	Glyceraldehyde-3-phosphate dehydrogenase	P04406	0	1	0	1	FALSE	Not applicable	Not applicable	Not applicable	Not applicable
GART	Trifunctional purine biosynthetic protein adenosine-3	P22102	0	0	0	1	FALSE	Not applicable	Not applicable	Not applicable	Not applicable
GAS2	Growth arrest-specific protein 2	O43903	0	0	0	1	FALSE	Not applicable	Not applicable	Not applicable	Not applicable
GAS6	Growth arrest-specific protein 6	Q14393	1	1	0	1	TRUE	1	1	0	1
GASK1A	Golgi-associated kinase 1A	Q9UFP1	0	0	0	1	FALSE	Not applicable	Not applicable	Not applicable	Not applicable
GAST	Gastrin	P01350	0	1	1	1	FALSE	Not applicable	Not applicable	Not applicable	Not applicable
GATA3	Trans-acting T-cell-specific transcription factor GATA-3	P23771	0	0	0	1	FALSE	Not applicable	Not applicable	Not applicable	Not applicable
GATD3	Glutamine amidotransferase-like class 1 domain-containing protein 3B, mitochondrial	P0DPI2	0	0	0	1	FALSE	Not applicable	Not applicable	Not applicable	Not applicable
GBA	Lysosomal acid glucosylceramidase	P04062	0	0	0	1	FALSE	Not applicable	Not applicable	Not applicable	Not applicable
GBP1	Guanylate-binding protein 1	P32455	0	0	0	1	FALSE	Not applicable	Not applicable	Not applicable	Not applicable
GBP2	Guanylate-binding protein 2	P32456	0	0	0	1	TRUE	0	0	0	1
GBP4	Guanylate-binding protein 4	Q96PP9	0	0	0	1	TRUE	0	0	0	1
GBP6	Guanylate-binding protein 6	Q6ZN66	0	1	0	1	FALSE	Not applicable	Not applicable	Not applicable	Not applicable
GC	Vitamin D-binding protein	P02774	0	1	1	1	FALSE	Not applicable	Not applicable	Not applicable	Not applicable
GCC1	GRIP and coiled-coil domain-containing protein 1	Q96CN9	0	0	1	1	FALSE	Not applicable	Not applicable	Not applicable	Not applicable
GCG	Pro-glucagon	P01275	0	1	0	1	TRUE	0	1	0	1
GCHFR	GTP cyclohydrolase 1 feedback regulatory protein	P30047	0	0	0	1	FALSE	Not applicable	Not applicable	Not applicable	Not applicable
GCLM	Glutamate--cysteine ligase regulatory subunit	P48507	0	0	0	1	FALSE	Not applicable	Not applicable	Not applicable	Not applicable
GCNT1	Beta-1,3-galactosyl-O-glycosyl-glycoprotein beta-1,6-N-acetylglucosaminyltransferase	Q02742	0	0	0	1	TRUE	0	0	0	1
GDF15	Growth/differentiation factor 15	Q99988	0	1	1	1	TRUE	0	1	1	1
GDF2	Growth/differentiation factor 2	Q9UK05	0	0	0	1	TRUE	0	0	0	1
GDNF	Glial cell line-derived neurotrophic factor	P39905	0	0	0	1	TRUE	0	0	0	1
GET3	ATPase GET3	O43681	0	0	0	1	FALSE	Not applicable	Not applicable	Not applicable	Not applicable
GFAP	Glial fibrillary acidic protein	P14136	0	0	0	1	TRUE	0	0	0	1
GFER	FAD-linked sulfhydryl oxidase ALR	P55789	0	0	0	1	TRUE	0	0	0	1
GFOD2	Glucose-fructose oxidoreductase domain-containing protein 2	Q3B7J2	0	0	0	1	TRUE	0	0	0	1
GFRA1	GDNF family receptor alpha-1	P56159	0	1	0	1	TRUE	0	1	0	1
GFRA2	GDNF family receptor alpha-2	O00451	0	1	0	1	TRUE	0	1	0	1
GFRA3	GDNF family receptor alpha-3	O60609	0	1	1	1	TRUE	0	1	1	1
GFRAL	GDNF family receptor alpha-like	Q6UXV0	0	0	1	1	FALSE	Not applicable	Not applicable	Not applicable	Not applicable
GGA1	ADP-ribosylation factor-binding protein GGA1	Q9UJY5	0	0	0	1	TRUE	0	0	0	1
GGACT	Gamma-glutamylaminecyclotransferase	Q9BVM4	0	0	0	1	FALSE	Not applicable	Not applicable	Not applicable	Not applicable
GGCT	Gamma-glutamylcyclotransferase	O75223	0	0	0	1	FALSE	Not applicable	Not applicable	Not applicable	Not applicable
GGH	Gamma-glutamyl hydrolase	Q92820	0	1	0	1	TRUE	0	1	0	1
GGT1	Glutathione hydrolase 1 proenzyme	P19440	0	0	0	1	TRUE	0	0	0	1
GGT5	Glutathione hydrolase 5 proenzyme	P36269	0	0	0	1	TRUE	0	0	0	1
GH1	Somatotropin	P01241	0	1	0	1	TRUE	0	1	0	1
GH2	Growth hormone variant	P01242	0	0	0	1	TRUE	0	0	0	1
GHR	Growth hormone receptor	P10912	0	0	0	1	FALSE	Not applicable	Not applicable	Not applicable	Not applicable
GHRHR	Growth hormone-releasing hormone receptor	Q02643	0	1	0	1	TRUE	0	1	0	1
GHRL	Appetite-regulating hormone	Q9UBU3	0	1	0	1	TRUE	0	1	0	1
GID8	Glucose-induced degradation protein 8 homolog	Q9NWU2	0	0	0	1	FALSE	Not applicable	Not applicable	Not applicable	Not applicable
GIGYF2	GRB10-interacting GYF protein 2	Q6Y7W6	0	0	0	1	FALSE	Not applicable	Not applicable	Not applicable	Not applicable
GIMAP7	GTPase IMAP family member 7	Q8NHV1	0	0	1	1	FALSE	Not applicable	Not applicable	Not applicable	Not applicable
GIMAP8	GTPase IMAP family member 8	Q8ND71	0	0	0	1	FALSE	Not applicable	Not applicable	Not applicable	Not applicable
GIP	Gastric inhibitory polypeptide	P09681	0	1	0	1	FALSE	Not applicable	Not applicable	Not applicable	Not applicable
GIPC2	PDZ domain-containing protein GIPC2	Q8TF65	0	0	0	1	FALSE	Not applicable	Not applicable	Not applicable	Not applicable
GIPC3	PDZ domain-containing protein GIPC3	Q8TF64	0	0	0	1	FALSE	Not applicable	Not applicable	Not applicable	Not applicable
GIPR	Gastric inhibitory polypeptide receptor	P48546	0	0	0	1	FALSE	Not applicable	Not applicable	Not applicable	Not applicable
GIT1	ARF GTPase-activating protein GIT1	Q9Y2X7	0	0	1	1	FALSE	Not applicable	Not applicable	Not applicable	Not applicable
GJA8	Gap junction alpha-8 protein	P48165	0	0	0	1	FALSE	Not applicable	Not applicable	Not applicable	Not applicable
GKN1	Gastrokine-1	Q9NS71	0	0	0	1	TRUE	0	0	0	1
GLA	Alpha-galactosidase A	P06280	0	0	0	1	FALSE	Not applicable	Not applicable	Not applicable	Not applicable
GLB1	Beta-galactosidase	P16278	0	0	0	1	TRUE	0	0	0	1
GLI2	Zinc finger protein GLI2	P10070	0	0	0	1	FALSE	Not applicable	Not applicable	Not applicable	Not applicable
GLIPR1	Glioma pathogenesis-related protein 1	P48060					FALSE
GLO1	Lactoylglutathione lyase	Q04760	0	1	1	1	TRUE	0	1	1	1
GLOD4	Glyoxalase domain-containing protein 4	Q9HC38	0	0	0	1	TRUE	0	0	0	1
GLP1R	Glucagon-like peptide 1 receptor	P43220	0	1	0	1	FALSE	Not applicable	Not applicable	Not applicable	Not applicable
GLRX	Glutaredoxin-1	P35754	0	0	0	1	TRUE	0	0	0	1
GLRX5	Glutaredoxin-related protein 5, mitochondrial	Q86SX6	0	0	0	1	FALSE	Not applicable	Not applicable	Not applicable	Not applicable
GLT8D2	Glycosyltransferase 8 domain-containing protein 2	Q9H1C3	1	0	0	1	TRUE	1	0	0	1
GLYR1	Putative oxidoreductase GLYR1	Q49A26	0	0	0	1	FALSE	Not applicable	Not applicable	Not applicable	Not applicable
GM2A	Ganglioside GM2 activator	P17900	0	0	0	1	FALSE	Not applicable	Not applicable	Not applicable	Not applicable
GMFG	Glia maturation factor gamma	O60234	0	0	0	1	FALSE	Not applicable	Not applicable	Not applicable	Not applicable
GMPR	GMP reductase 1	P36959	0	0	0	1	TRUE	0	0	0	1
GMPR2	GMP reductase 2	Q9P2T1	0	0	0	1	FALSE	Not applicable	Not applicable	Not applicable	Not applicable
GNAS	Neuroendocrine secretory protein 55	O95467	0	0	0	1	FALSE	Not applicable	Not applicable	Not applicable	Not applicable
GNE	Bifunctional UDP-N-acetylglucosamine 2-epimerase/N-acetylmannosamine kinase	Q9Y223	0	1	0	1	TRUE	0	1	0	1
GNGT1	Guanine nucleotide-binding protein G(T) subunit gamma-T1	P63211	0	0	0	1	FALSE	Not applicable	Not applicable	Not applicable	Not applicable
GNLY	Granulysin	P22749	0	0	1	1	TRUE	0	0	1	1
GNPDA1	Glucosamine-6-phosphate isomerase 1	P46926	0	0	0	1	FALSE	Not applicable	Not applicable	Not applicable	Not applicable
GNPDA2	Glucosamine-6-phosphate isomerase 2	Q8TDQ7	0	0	0	1	FALSE	Not applicable	Not applicable	Not applicable	Not applicable
GOLGA3	Golgin subfamily A member 3	Q08378	0	0	1	1	FALSE	Not applicable	Not applicable	Not applicable	Not applicable
GOLM2	Protein GOLM2	Q6P4E1	0	0	1	1	TRUE	0	0	1	1
GOPC	Golgi-associated PDZ and coiled-coil motif-containing protein	Q9HD26	0	0	1	1	TRUE	0	0	1	1
GORASP2	Golgi reassembly-stacking protein 2	Q9H8Y8	0	0	0	1	FALSE	Not applicable	Not applicable	Not applicable	Not applicable
GOT1	Aspartate aminotransferase, cytoplasmic	P17174	0	0	0	1	FALSE	Not applicable	Not applicable	Not applicable	Not applicable
GP1BA	Platelet glycoprotein Ib alpha chain	P07359	0	0	0	1	TRUE	0	0	0	1
GP1BB	Platelet glycoprotein Ib beta chain	P13224	0	0	0	1	FALSE	Not applicable	Not applicable	Not applicable	Not applicable
GP2	Pancreatic secretory granule membrane major glycoprotein GP2	P55259	0	1	0	1	TRUE	0	1	0	1
GP5	Platelet glycoprotein V	P40197	0	0	0	1	FALSE	Not applicable	Not applicable	Not applicable	Not applicable
GP6	Platelet glycoprotein VI	Q9HCN6	0	1	0	1	TRUE	0	1	0	1
GPA33	Cell surface A33 antigen	Q99795	0	0	0	1	TRUE	0	0	0	1
GPC1	Glypican-1	P35052	0	1	1	1	TRUE	0	1	1	1
GPC5	Glypican-5	P78333	1	0	0	1	TRUE	1	0	0	1
GPD1	Glycerol-3-phosphate dehydrogenase	P21695	0	0	0	1	FALSE	Not applicable	Not applicable	Not applicable	Not applicable
GPHA2	Glycoprotein hormone alpha-2	Q96T91	0	0	1	1	FALSE	Not applicable	Not applicable	Not applicable	Not applicable
GPI	Glucose-6-phosphate isomerase	P06744	0	1	0	1	FALSE	Not applicable	Not applicable	Not applicable	Not applicable
GPIHBP1	Glycosylphosphatidylinositol-anchored high density lipoprotein-binding protein 1	Q8IV16	0	0	0	1	FALSE	Not applicable	Not applicable	Not applicable	Not applicable
GPKOW	G-patch domain and KOW motifs-containing protein	Q92917	0	0	1	1	TRUE	0	0	1	1
GPNMB	Transmembrane glycoprotein NMB	Q14956	1	0	0	1	TRUE	1	0	0	1
GPR101	Probable G-protein coupled receptor 101	Q96P66	0	0	0	1	FALSE	Not applicable	Not applicable	Not applicable	Not applicable
GPR158	Probable G-protein coupled receptor 158	Q5T848	0	0	0	1	FALSE	Not applicable	Not applicable	Not applicable	Not applicable
GPR15L	Protein GPR15L	Q6UWK7	0	0	0	1	FALSE	Not applicable	Not applicable	Not applicable	Not applicable
GPR37	Prosaposin receptor GPR37	O15354	0	0	1	1	TRUE	0	0	1	1
GPRC5C	G-protein coupled receptor family C group 5 member C	Q9NQ84	1	0	1	1	FALSE	Not applicable	Not applicable	Not applicable	Not applicable
GRAP2	GRB2-related adapter protein 2	O75791	0	1	0	1	TRUE	0	1	0	1
GRHPR	Glyoxylate reductase/hydroxypyruvate reductase	Q9UBQ7	0	0	0	1	FALSE	Not applicable	Not applicable	Not applicable	Not applicable
GRIK2	Glutamate receptor ionotropic, kainate 2	Q13002	0	0	0	1	FALSE	Not applicable	Not applicable	Not applicable	Not applicable
GRIN2B	Glutamate receptor ionotropic, NMDA 2B	Q13224	0	0	0	1	FALSE	Not applicable	Not applicable	Not applicable	Not applicable
GRK5	G protein-coupled receptor kinase 5	P34947	1	0	0	1	TRUE	1	0	0	1
GRN	Progranulin	P28799	0	1	1	1	TRUE	0	1	1	1
GRP	Gastrin-releasing peptide	P07492	0	0	0	1	FALSE	Not applicable	Not applicable	Not applicable	Not applicable
GRPEL1	GrpE protein homolog 1, mitochondrial	Q9HAV7	0	0	0	1	TRUE	0	0	0	1
GRSF1	G-rich sequence factor 1	Q12849	0	0	0	1	FALSE	Not applicable	Not applicable	Not applicable	Not applicable
GSAP	Gamma-secretase-activating protein	A4D1B5	0	0	0	1	TRUE	0	0	0	1
GSN	Gelsolin	P06396	0	0	1	1	FALSE	Not applicable	Not applicable	Not applicable	Not applicable
GSR	Glutathione reductase, mitochondrial	P00390	0	1	0	1	FALSE	Not applicable	Not applicable	Not applicable	Not applicable
GSTA1	Glutathione S-transferase A1	P08263	0	1	0	1	TRUE	0	1	0	1
GSTA3	Glutathione S-transferase A3	Q16772	0	1	0	1	TRUE	0	1	0	1
GSTM4	Glutathione S-transferase Mu 4	Q03013	0	1	0	1	FALSE	Not applicable	Not applicable	Not applicable	Not applicable
GSTP1	Glutathione S-transferase P	P09211	0	1	0	1	TRUE	0	1	0	1
GSTT2B	Glutathione S-transferase theta-2B	P0CG30	0	1	0	1	FALSE	Not applicable	Not applicable	Not applicable	Not applicable
GTF2IRD1	General transcription factor II-I repeat domain-containing protein 1	Q9UHL9	0	0	0	1	FALSE	Not applicable	Not applicable	Not applicable	Not applicable
GTPBP2	GTP-binding protein 2	Q9BX10	0	0	0	1	FALSE	Not applicable	Not applicable	Not applicable	Not applicable
GUCA2A	Guanylin	Q02747	0	1	0	1	TRUE	0	1	0	1
GUCY2C	Heat-stable enterotoxin receptor	P25092	0	0	0	1	FALSE	Not applicable	Not applicable	Not applicable	Not applicable
GUK1	Guanylate kinase	Q16774	0	0	0	1	FALSE	Not applicable	Not applicable	Not applicable	Not applicable
GUSB	Beta-glucuronidase	P08236	0	0	0	1	TRUE	0	0	0	1
GYS1	Glycogen [starch] synthase, muscle	P13807	0	0	1	1	TRUE	0	0	1	1
GZMA	Granzyme A	P12544	0	0	0	1	TRUE	0	0	0	1
GZMB	Granzyme B	P10144	0	1	0	1	TRUE	0	1	0	1
GZMH	Granzyme H	P20718	0	0	0	1	TRUE	0	0	0	1
H2AP	Huntingtin-interacting protein M	O75409	0	0	0	1	FALSE	Not applicable	Not applicable	Not applicable	Not applicable
HADH	Hydroxyacyl-coenzyme A dehydrogenase, mitochondrial	Q16836	0	0	0	1	FALSE	Not applicable	Not applicable	Not applicable	Not applicable
HAGH	Hydroxyacylglutathione hydrolase, mitochondrial	Q16775	0	0	0	1	TRUE	0	0	0	1
HAO1	Hydroxyacid oxidase 1	Q9UJM8	0	0	0	1	TRUE	0	0	0	1
HARS1	Histidine--tRNA ligase, cytoplasmic	P12081	0	0	0	1	TRUE	0	0	0	1
HAVCR1	Hepatitis A virus cellular receptor 1	Q96D42	0	0	0	1	TRUE	0	0	0	1
HAVCR2	Hepatitis A virus cellular receptor 2	Q8TDQ0	0	0	0	1	TRUE	0	0	0	1
HBEGF	Proheparin-binding EGF-like growth factor	Q99075	0	1	0	1	TRUE	0	1	0	1
HBQ1	Hemoglobin subunit theta-1	P09105	0	0	0	1	TRUE	0	0	0	1
HBZ	Hemoglobin subunit zeta	P02008	0	0	1	1	FALSE	Not applicable	Not applicable	Not applicable	Not applicable
HCG22	Protein PBMUCL2	E2RYF7	0	0	0	1	FALSE	Not applicable	Not applicable	Not applicable	Not applicable
HCLS1	Hematopoietic lineage cell-specific protein	P14317	0	0	0	1	TRUE	0	0	0	1
HDAC8	Histone deacetylase 8	Q9BY41	0	0	0	1	FALSE	Not applicable	Not applicable	Not applicable	Not applicable
HDAC9	Histone deacetylase 9	Q9UKV0	0	1	0	1	FALSE	Not applicable	Not applicable	Not applicable	Not applicable
HDDC2	5'-deoxynucleotidase HDDC2	Q7Z4H3	0	0	0	1	FALSE	Not applicable	Not applicable	Not applicable	Not applicable
HDGF	Hepatoma-derived growth factor	P51858	0	0	0	1	TRUE	0	0	0	1
HDGFL2	Hepatoma-derived growth factor-related protein 2	Q7Z4V5	0	0	1	1	FALSE	Not applicable	Not applicable	Not applicable	Not applicable
HEBP1	Heme-binding protein 1	Q9NRV9	0	0	0	1	TRUE	0	0	0	1
HEG1	Protein HEG homolog 1	Q9ULI3	0	0	0	1	FALSE	Not applicable	Not applicable	Not applicable	Not applicable
HEPACAM2	HEPACAM family member 2	A8MVW5	0	0	1	1	FALSE	Not applicable	Not applicable	Not applicable	Not applicable
HEPH	Hephaestin	Q9BQS7	1	0	0	1	FALSE	Not applicable	Not applicable	Not applicable	Not applicable
HEXIM1	Protein HEXIM1	O94992	0	0	1	1	TRUE	0	0	1	1
HGF	Hepatocyte growth factor	P14210	1	1	0	1	TRUE	1	1	0	1
HGFAC	Hepatocyte growth factor activator	Q04756	0	0	0	1	FALSE	Not applicable	Not applicable	Not applicable	Not applicable
HGS	Hepatocyte growth factor-regulated tyrosine kinase substrate	O14964	0	1	0	1	TRUE	0	1	0	1
HHEX	Hematopoietically-expressed homeobox protein HHEX	Q03014	0	0	1	1	FALSE	Not applicable	Not applicable	Not applicable	Not applicable
HIF1A	Hypoxia-inducible factor 1-alpha	Q16665	0	1	0	1	FALSE	Not applicable	Not applicable	Not applicable	Not applicable
HIP1	Huntingtin-interacting protein 1	O00291	0	0	0	1	FALSE	Not applicable	Not applicable	Not applicable	Not applicable
HIP1R	Huntingtin-interacting protein 1-related protein	O75146	0	0	0	1	FALSE	Not applicable	Not applicable	Not applicable	Not applicable
HJV	Hemojuvelin	Q6ZVN8	0	0	1	1	FALSE	Not applicable	Not applicable	Not applicable	Not applicable
HK2	Hexokinase-2	P52789	0	0	0	1	TRUE	0	0	0	1
HLA-A	HLA class I histocompatibility antigen, A alpha chain	P04439	0	0	0	1	FALSE	Not applicable	Not applicable	Not applicable	Not applicable
HLA-DRA	HLA class II histocompatibility antigen, DR alpha chain	P01903	0	0	1	1	FALSE	Not applicable	Not applicable	Not applicable	Not applicable
HLA-E	HLA class I histocompatibility antigen, alpha chain E	P13747	0	0	1	1	FALSE	Not applicable	Not applicable	Not applicable	Not applicable
HMBS	Porphobilinogen deaminase	P08397	0	0	0	1	TRUE	0	0	0	1
HMCN2	Hemicentin-2	Q8NDA2	0	0	1	1	FALSE	Not applicable	Not applicable	Not applicable	Not applicable
HMGCL	Hydroxymethylglutaryl-CoA lyase, mitochondrial	P35914	0	0	0	1	FALSE	Not applicable	Not applicable	Not applicable	Not applicable
HMGCS1	Hydroxymethylglutaryl-CoA synthase, cytoplasmic	Q01581	0	0	0	1	FALSE	Not applicable	Not applicable	Not applicable	Not applicable
HMMR	Hyaluronan mediated motility receptor	O75330	0	0	0	1	FALSE	Not applicable	Not applicable	Not applicable	Not applicable
HMOX1	Heme oxygenase 1	P09601	0	1	0	1	TRUE	0	1	0	1
HMOX2	Heme oxygenase 2	P30519	0	0	1	1	TRUE	0	0	1	1
HNF1A	Hepatocyte nuclear factor 1-alpha	P20823	0	1	0	1	FALSE	Not applicable	Not applicable	Not applicable	Not applicable
HNMT	Histamine N-methyltransferase	P50135	0	0	0	1	TRUE	0	0	0	1
HNRNPK	Heterogeneous nuclear ribonucleoprotein K	P61978	0	0	0	1	TRUE	0	0	0	1
HNRNPUL1	Heterogeneous nuclear ribonucleoprotein U-like protein 1	Q9BUJ2	0	0	0	1	FALSE	Not applicable	Not applicable	Not applicable	Not applicable
HPCAL1	Hippocalcin-like protein 1	P37235	0	0	0	1	TRUE	0	0	0	1
HPGDS	Hematopoietic prostaglandin D synthase	O60760	0	1	0	1	TRUE	0	1	0	1
HPSE	Heparanase	Q9Y251	0	1	0	1	FALSE	Not applicable	Not applicable	Not applicable	Not applicable
HRAS	GTPase Hras	P01112	0	1	0	1	FALSE	Not applicable	Not applicable	Not applicable	Not applicable
HRC	Sarcoplasmic reticulum histidine-rich calcium-binding protein	P23327	1	0	0	1	FALSE	Not applicable	Not applicable	Not applicable	Not applicable
HRG	Histidine-rich glycoprotein	P04196	0	0	0	1	FALSE	Not applicable	Not applicable	Not applicable	Not applicable
HS1BP3	HCLS1-binding protein 3	Q53T59	0	0	0	1	FALSE	Not applicable	Not applicable	Not applicable	Not applicable
HS3ST3B1	Heparan sulfate glucosamine 3-O-sulfotransferase 3B1	Q9Y662	0	0	0	1	TRUE	0	0	0	1
HS6ST1	Heparan-sulfate 6-O-sulfotransferase 1	O60243	0	0	0	1	TRUE	0	0	0	1
HS6ST2	Heparan-sulfate 6-O-sulfotransferase 2	Q96MM7	0	0	0	1	FALSE	Not applicable	Not applicable	Not applicable	Not applicable
HSBP1	Heat shock factor-binding protein 1	O75506	0	0	0	1	FALSE	Not applicable	Not applicable	Not applicable	Not applicable
HSD11B1	Corticosteroid 11-beta-dehydrogenase isozyme 1	P28845	0	1	1	1	TRUE	0	1	1	1
HSD17B14	17-beta-hydroxysteroid dehydrogenase 14	Q9BPX1	0	0	1	1	FALSE	Not applicable	Not applicable	Not applicable	Not applicable
HSD17B3	Testosterone 17-beta-dehydrogenase 3	P37058	0	0	0	1	FALSE	Not applicable	Not applicable	Not applicable	Not applicable
HSDL2	Hydroxysteroid dehydrogenase-like protein 2	Q6YN16	0	1	0	1	FALSE	Not applicable	Not applicable	Not applicable	Not applicable
HSP90B1	Endoplasmin	P14625	0	1	0	1	TRUE	0	1	0	1
HSPA1A	Heat shock 70 kDa protein 1A	P0DMV8	0	1	0	1	TRUE	0	1	0	1
HSPA2	Heat shock-related 70 kDa protein 2	P54652	0	1	0	1	FALSE	Not applicable	Not applicable	Not applicable	Not applicable
HSPB1	Heat shock protein beta-1	P04792	1	1	0	1	TRUE	1	1	0	1
HSPB6	Heat shock protein beta-6	O14558	1	0	0	1	TRUE	1	0	0	1
HSPG2	Basement membrane-specific heparan sulfate proteoglycan core protein	P98160	1	1	0	1	TRUE	1	1	0	1
HTR1A	5-hydroxytryptamine receptor 1A	P08908	0	0	0	1	FALSE	Not applicable	Not applicable	Not applicable	Not applicable
HTR1B	5-hydroxytryptamine receptor 1B	P28222	1	1	0	1	FALSE	Not applicable	Not applicable	Not applicable	Not applicable
HTRA2	Serine protease HTRA2, mitochondrial	O43464	0	0	0	1	TRUE	0	0	0	1
HYAL1	Hyaluronidase-1	Q12794	0	0	1	1	TRUE	0	0	1	1
HYOU1	Hypoxia up-regulated protein 1	Q9Y4L1	0	0	0	1	TRUE	0	0	0	1
ICA1	Islet cell autoantigen 1	Q05084	0	1	0	1	TRUE	0	1	0	1
ICAM1	Intercellular adhesion molecule 1	P05362	0	1	0	1	TRUE	0	1	0	1
ICAM2	Intercellular adhesion molecule 2	P13598	0	1	0	1	TRUE	0	1	0	1
ICAM3	Intercellular adhesion molecule 3	P32942	0	0	0	1	TRUE	0	0	0	1
ICAM4	Intercellular adhesion molecule 4	Q14773	0	0	0	1	TRUE	0	0	0	1
ICAM5	Intercellular adhesion molecule 5	Q9UMF0	0	0	0	1	TRUE	0	0	0	1
ICOSLG	ICOS ligand	O75144	0	0	1	1	TRUE	0	0	1	1
ID4	DNA-binding protein inhibitor ID-4	P47928	1	0	0	1	FALSE	Not applicable	Not applicable	Not applicable	Not applicable
IDI2	Isopentenyl-diphosphate delta-isomerase 2	Q9BXS1	0	0	0	1	TRUE	0	0	0	1
IDO1	Indoleamine 2,3-dioxygenase 1	P14902	0	1	1	1	FALSE	Not applicable	Not applicable	Not applicable	Not applicable
IDS	Iduronate 2-sulfatase	P22304	0	0	0	1	TRUE	0	0	0	1
IDUA	Alpha-L-iduronidase	P35475	0	0	0	1	TRUE	0	0	0	1
IFI30	Gamma-interferon-inducible lysosomal thiol reductase	P13284	0	0	1	1	FALSE	Not applicable	Not applicable	Not applicable	Not applicable
IFIT1	Interferon-induced protein with tetratricopeptide repeats 1	P09914	0	0	0	1	FALSE	Not applicable	Not applicable	Not applicable	Not applicable
IFIT3	Interferon-induced protein with tetratricopeptide repeats 3	O14879	0	0	0	1	FALSE	Not applicable	Not applicable	Not applicable	Not applicable
IFNAR1	Interferon alpha/beta receptor 1	P17181	0	0	0	1	FALSE	Not applicable	Not applicable	Not applicable	Not applicable
IFNG	Interferon gamma	P01579	0	1	0	1	TRUE	0	1	0	1
IFNGR1	Interferon gamma receptor 1	P15260	0	1	1	1	TRUE	0	1	1	1
IFNGR2	Interferon gamma receptor 2	P38484	0	1	0	1	TRUE	0	1	0	1
IFNL1	Interferon lambda-1	Q8IU54	0	0	0	1	TRUE	0	0	0	1
IFNL2	Interferon lambda-2	Q8IZJ0	0	0	0	1	FALSE	Not applicable	Not applicable	Not applicable	Not applicable
IFNLR1	Interferon lambda receptor 1	Q8IU57	0	0	0	1	TRUE	0	0	0	1
IFNW1	Interferon omega-1	P05000	0	0	0	1	FALSE	Not applicable	Not applicable	Not applicable	Not applicable
IFT20	Intraflagellar transport protein 20 homolog	Q8IY31	0	0	0	1	FALSE	Not applicable	Not applicable	Not applicable	Not applicable
IGBP1	Immunoglobulin-binding protein 1	P78318	0	0	0	1	FALSE	Not applicable	Not applicable	Not applicable	Not applicable
IGDCC3	Immunoglobulin superfamily DCC subclass member 3	Q8IVU1	0	0	0	1	FALSE	Not applicable	Not applicable	Not applicable	Not applicable
IGDCC4	Immunoglobulin superfamily DCC subclass member 4	Q8TDY8	0	0	1	1	FALSE	Not applicable	Not applicable	Not applicable	Not applicable
IGF1R	Insulin-like growth factor 1 receptor	P08069	0	1	0	1	TRUE	0	1	0	1
IGF2BP3	Insulin-like growth factor 2 mRNA-binding protein 3	O00425	0	0	0	1	FALSE	Not applicable	Not applicable	Not applicable	Not applicable
IGF2R	Cation-independent mannose-6-phosphate receptor	P11717	0	1	0	1	TRUE	0	1	0	1
IGFBP1	Insulin-like growth factor-binding protein 1	P08833	0	1	0	1	TRUE	0	1	0	1
IGFBP2	Insulin-like growth factor-binding protein 2	P18065	1	1	0	1	TRUE	1	1	0	1
IGFBP3	Insulin-like growth factor-binding protein 3	P17936	1	1	0	1	TRUE	1	1	0	1
IGFBP4	Insulin-like growth factor-binding protein 4	P22692	0	0	0	1	TRUE	0	0	0	1
IGFBP6	Insulin-like growth factor-binding protein 6	P24592	1	0	0	1	TRUE	1	0	0	1
IGFBP7	Insulin-like growth factor-binding protein 7	Q16270	1	1	0	1	TRUE	1	1	0	1
IGFBPL1	Insulin-like growth factor-binding protein-like 1	Q8WX77	1	0	1	1	TRUE	1	0	1	1
IGFL4	Insulin growth factor-like family member 4	Q6B9Z1	0	1	0	1	FALSE	Not applicable	Not applicable	Not applicable	Not applicable
IGHMBP2	DNA-binding protein SMUBP-2	P38935	0	0	0	1	FALSE	Not applicable	Not applicable	Not applicable	Not applicable
IGLC2	Immunoglobulin lambda constant 2	P0DOY2	0	0	0	1	FALSE	Not applicable	Not applicable	Not applicable	Not applicable
IGLON5	IgLON family member 5	A6NGN9	0	0	0	1	FALSE	Not applicable	Not applicable	Not applicable	Not applicable
IGSF21	Immunoglobulin superfamily member 21	Q96ID5	0	0	0	1	FALSE	Not applicable	Not applicable	Not applicable	Not applicable
IGSF3	Immunoglobulin superfamily member 3	O75054	0	0	0	1	TRUE	0	0	0	1
IGSF8	Immunoglobulin superfamily member 8	Q969P0	0	0	0	1	TRUE	0	0	0	1
IGSF9	Protein turtle homolog A	Q9P2J2	0	0	0	1	FALSE	Not applicable	Not applicable	Not applicable	Not applicable
IKBKG	NF-kappa-B essential modulator	Q9Y6K9	0	1	1	1	TRUE	0	1	1	1
IKZF2	Zinc finger protein Helios	Q9UKS7	0	0	0	1	TRUE	0	0	0	1
IL10	Interleukin-10	P22301	0	1	1	1	TRUE	0	1	1	1
IL10RA	Interleukin-10 receptor subunit alpha	Q13651	0	0	0	1	TRUE	0	0	0	1
IL10RB	Interleukin-10 receptor subunit beta	Q08334	0	0	0	1	TRUE	0	0	0	1
IL11	Interleukin-11	P20809	0	1	0	1	TRUE	0	1	0	1
IL12A_IL12B	Interleukin-12	P29459_P29460	0	0	0	1	TRUE	0	0	0	1
IL12B	Interleukin-12 subunit beta	P29460	0	1	0	1	TRUE	0	1	0	1
IL12RB1	Interleukin-12 receptor subunit beta-1	P42701	0	1	0	1	TRUE	0	1	0	1
IL12RB2	Interleukin-12 receptor subunit beta-2	Q99665	0	1	0	1	FALSE	Not applicable	Not applicable	Not applicable	Not applicable
IL13	Interleukin-13	P35225	0	1	0	1	TRUE	0	1	0	1
IL13RA1	Interleukin-13 receptor subunit alpha-1	P78552	0	0	0	1	TRUE	0	0	0	1
IL13RA2	Interleukin-13 receptor subunit alpha-2	Q14627	1	0	0	1	FALSE	Not applicable	Not applicable	Not applicable	Not applicable
IL15	Interleukin-15	P40933	0	1	0	1	TRUE	0	1	0	1
IL15RA	Interleukin-15 receptor subunit alpha	Q13261	0	0	1	1	TRUE	0	0	1	1
IL16	Pro-interleukin-16	Q14005	0	0	0	1	TRUE	0	0	0	1
IL17A	Interleukin-17A	Q16552	0	1	0	1	TRUE	0	1	0	1
IL17C	Interleukin-17C	Q9P0M4	0	0	0	1	TRUE	0	0	0	1
IL17D	Interleukin-17D	Q8TAD2	0	1	0	1	TRUE	0	1	0	1
IL17F	Interleukin-17F	Q96PD4	0	1	0	1	TRUE	0	1	0	1
IL17RA	Interleukin-17 receptor A	Q96F46	0	0	0	1	TRUE	0	0	0	1
IL17RB	Interleukin-17 receptor B	Q9NRM6	0	0	1	1	TRUE	0	0	1	1
IL18	Interleukin-18	Q14116	0	1	0	1	TRUE	0	1	0	1
IL18BP	Interleukin-18-binding protein	O95998	0	1	0	1	TRUE	0	1	0	1
IL18R1	Interleukin-18 receptor 1	Q13478	0	1	0	1	TRUE	0	1	0	1
IL18RAP	Interleukin-18 receptor accessory protein	O95256	0	1	0	1	TRUE	0	1	0	1
IL19	Interleukin-19	Q9UHD0	0	1	0	1	TRUE	0	1	0	1
IL1A	Interleukin-1 alpha	P01583	0	1	0	1	TRUE	0	1	0	1
IL1B	Interleukin-1 beta	P01584	0	1	0	1	TRUE	0	1	0	1
IL1R1	Interleukin-1 receptor type 1	P14778	0	1	1	1	TRUE	0	1	1	1
IL1R2	Interleukin-1 receptor type 2	P27930	0	1	0	1	TRUE	0	1	0	1
IL1RAP	Interleukin-1 receptor accessory protein	Q9NPH3	0	0	0	1	TRUE	0	0	0	1
IL1RL1	Interleukin-1 receptor-like 1	Q01638	0	1	0	1	TRUE	0	1	0	1
IL1RL2	Interleukin-1 receptor-like 2	Q9HB29	0	0	0	1	TRUE	0	0	0	1
IL1RN	Interleukin-1 receptor antagonist protein	P18510	0	1	0	1	TRUE	0	1	0	1
IL2	Interleukin-2	P60568	0	1	0	1	TRUE	0	1	0	1
IL20	Interleukin-20	Q9NYY1	0	1	0	1	TRUE	0	1	0	1
IL20RA	Interleukin-20 receptor subunit alpha	Q9UHF4	0	0	0	1	TRUE	0	0	0	1
IL20RB	Interleukin-20 receptor subunit beta	Q6UXL0	0	0	0	1	FALSE	Not applicable	Not applicable	Not applicable	Not applicable
IL21R	Interleukin-21 receptor	Q9HBE5	0	0	0	1	FALSE	Not applicable	Not applicable	Not applicable	Not applicable
IL22	Interleukin-22	Q9GZX6	0	0	0	1	FALSE	Not applicable	Not applicable	Not applicable	Not applicable
IL22RA1	Interleukin-22 receptor subunit alpha-1	Q8N6P7	0	0	0	1	TRUE	0	0	0	1
IL24	Interleukin-24	Q13007	0	0	0	1	TRUE	0	0	0	1
IL25	Interleukin-25	Q9H293	0	1	0	1	FALSE	Not applicable	Not applicable	Not applicable	Not applicable
IL2RA	Interleukin-2 receptor subunit alpha	P01589	0	1	0	1	TRUE	0	1	0	1
IL2RB	Interleukin-2 receptor subunit beta	P14784	0	1	0	1	TRUE	0	1	0	1
IL2RG	Cytokine receptor common subunit gamma	P31785	0	1	0	1	FALSE	Not applicable	Not applicable	Not applicable	Not applicable
IL3	Interleukin-3	P08700	0	1	0	1	FALSE	Not applicable	Not applicable	Not applicable	Not applicable
IL31	Interleukin-31	Q6EBC2	0	0	0	1	FALSE	Not applicable	Not applicable	Not applicable	Not applicable
IL31RA	Interleukin-31 receptor subunit alpha	Q8NI17	1	0	0	1	FALSE	Not applicable	Not applicable	Not applicable	Not applicable
IL32	Interleukin-32	P24001	0	1	0	1	TRUE	0	1	0	1
IL33	Interleukin-33	O95760	1	1	0	1	TRUE	1	1	0	1
IL34	Interleukin-34	Q6ZMJ4	0	0	0	1	TRUE	0	0	0	1
IL36A	Interleukin-36 alpha	Q9UHA7	0	0	0	1	FALSE	Not applicable	Not applicable	Not applicable	Not applicable
IL36G	Interleukin-36 gamma	Q9NZH8	0	0	0	1	FALSE	Not applicable	Not applicable	Not applicable	Not applicable
IL3RA	Interleukin-3 receptor subunit alpha	P26951	0	0	0	1	TRUE	0	0	0	1
IL4	Interleukin-4	P05112	0	1	0	1	TRUE	0	1	0	1
IL4R	Interleukin-4 receptor subunit alpha	P24394	0	0	0	1	TRUE	0	0	0	1
IL5	Interleukin-5	P05113	0	1	0	1	TRUE	0	1	0	1
IL5RA	Interleukin-5 receptor subunit alpha	Q01344	0	0	0	1	TRUE	0	0	0	1
IL6	Interleukin-6	P05231	0	1	0	1	TRUE	0	1	0	1
IL6R	Interleukin-6 receptor subunit alpha	P08887	0	1	0	1	TRUE	0	1	0	1
IL6ST	Interleukin-6 receptor subunit beta	P40189	0	1	1	1	TRUE	0	1	1	1
IL7	Interleukin-7	P13232	0	1	0	1	TRUE	0	1	0	1
IL7R	Interleukin-7 receptor subunit alpha	P16871	0	0	1	1	TRUE	0	0	1	1
IL9	Interleukin-9	P15248	0	1	1	1	FALSE	Not applicable	Not applicable	Not applicable	Not applicable
ILKAP	Integrin-linked kinase-associated serine/threonine phosphatase 2C	Q9H0C8	0	0	0	1	TRUE	0	0	0	1
IMMT	MICOS complex subunit MIC60	Q16891	0	0	0	1	FALSE	Not applicable	Not applicable	Not applicable	Not applicable
IMPA1	Inositol monophosphatase 1	P29218	0	0	0	1	TRUE	0	0	0	1
IMPACT	Protein IMPACT	Q9P2X3	0	0	0	1	FALSE	Not applicable	Not applicable	Not applicable	Not applicable
IMPG1	Interphotoreceptor matrix proteoglycan 1	Q17R60	0	0	0	1	FALSE	Not applicable	Not applicable	Not applicable	Not applicable
ING1	Inhibitor of growth protein 1	Q9UK53	0	0	0	1	TRUE	0	0	0	1
INHBB	Inhibin beta B chain	P09529	0	0	0	1	FALSE	Not applicable	Not applicable	Not applicable	Not applicable
INHBC	Inhibin beta C chain	P55103	0	0	0	1	TRUE	0	0	0	1
INPP1	Inositol polyphosphate 1-phosphatase	P49441	0	0	0	1	TRUE	0	0	0	1
INPP5D	Phosphatidylinositol 3,4,5-trisphosphate 5-phosphatase 1	Q92835	0	1	1	1	FALSE	Not applicable	Not applicable	Not applicable	Not applicable
INPP5J	Phosphatidylinositol 4,5-bisphosphate 5-phosphatase A	Q15735	0	0	0	1	FALSE	Not applicable	Not applicable	Not applicable	Not applicable
INPPL1	Phosphatidylinositol 3,4,5-trisphosphate 5-phosphatase 2	O15357	0	0	0	1	TRUE	0	0	0	1
INSL3	Insulin-like 3	P51460	0	0	0	1	FALSE	Not applicable	Not applicable	Not applicable	Not applicable
INSL4	Early placenta insulin-like peptide	Q14641	0	0	0	1	FALSE	Not applicable	Not applicable	Not applicable	Not applicable
INSL5	Insulin-like peptide INSL5	Q9Y5Q6	0	0	0	1	FALSE	Not applicable	Not applicable	Not applicable	Not applicable
INSR	Insulin receptor	P06213	0	1	0	1	FALSE	Not applicable	Not applicable	Not applicable	Not applicable
IPCEF1	Interactor protein for cytohesin exchange factors 1	Q8WWN9	0	0	0	1	TRUE	0	0	0	1
IQGAP2	Ras GTPase-activating-like protein IQGAP2	Q13576	0	0	0	1	TRUE	0	0	0	1
IRAG2	Inositol 1,4,5-triphosphate receptor associated 2	Q12912	0	0	0	1	TRUE	0	0	0	1
IRAK1	Interleukin-1 receptor-associated kinase 1	P51617	0	1	0	1	TRUE	0	1	0	1
IRAK4	Interleukin-1 receptor-associated kinase 4	Q9NWZ3	0	1	0	1	TRUE	0	1	0	1
ISLR2	Immunoglobulin superfamily containing leucine-rich repeat protein 2	Q6UXK2	0	0	0	1	TRUE	0	0	0	1
ISM1	Isthmin-1	B1AKI9	1	0	1	1	TRUE	1	0	1	1
ISM2	Isthmin-2	Q6H9L7	0	0	1	1	FALSE	Not applicable	Not applicable	Not applicable	Not applicable
IST1	IST1 homolog	P53990	0	0	0	1	FALSE	Not applicable	Not applicable	Not applicable	Not applicable
ITGA11	Integrin alpha-11	Q9UKX5	1	0	1	1	TRUE	1	0	1	1
ITGA2	Integrin alpha-2	P17301	0	1	1	1	FALSE	Not applicable	Not applicable	Not applicable	Not applicable
ITGA5	Integrin alpha-5	P08648	1	0	0	1	TRUE	1	0	0	1
ITGA6	Integrin alpha-6	P23229	0	0	0	1	TRUE	0	0	0	1
ITGAL	Integrin alpha-L	P20701	0	1	0	1	FALSE	Not applicable	Not applicable	Not applicable	Not applicable
ITGAM	Integrin alpha-M	P11215	0	1	1	1	TRUE	0	1	1	1
ITGAV	Integrin alpha-V	P06756	0	1	1	1	TRUE	0	1	1	1
ITGAX	Integrin alpha-X	P20702	0	1	0	1	FALSE	Not applicable	Not applicable	Not applicable	Not applicable
ITGB1	Integrin beta-1	P05556	1	1	1	1	TRUE	1	1	1	1
ITGB1BP1	Integrin beta-1-binding protein 1	O14713	0	0	0	1	TRUE	0	0	0	1
ITGB1BP2	Integrin beta-1-binding protein 2	Q9UKP3	1	0	0	1	TRUE	1	0	0	1
ITGB2	Integrin beta-2	P05107	0	1	0	1	TRUE	0	1	0	1
ITGB5	Integrin beta-5	P18084	1	1	0	1	TRUE	1	1	0	1
ITGB6	Integrin beta-6	P18564	0	0	1	1	TRUE	0	0	1	1
ITGB7	Integrin beta-7	P26010	0	0	0	1	TRUE	0	0	0	1
ITGBL1	Integrin beta-like protein 1	O95965	1	0	0	1	FALSE	Not applicable	Not applicable	Not applicable	Not applicable
ITIH1	Inter-alpha-trypsin inhibitor heavy chain H1	P19827	1	0	0	1	FALSE	Not applicable	Not applicable	Not applicable	Not applicable
ITIH3	Inter-alpha-trypsin inhibitor heavy chain H3	Q06033	1	0	0	1	TRUE	1	0	0	1
ITIH4	Inter-alpha-trypsin inhibitor heavy chain H4	Q14624	1	1	1	1	FALSE	Not applicable	Not applicable	Not applicable	Not applicable
ITIH5	Inter-alpha-trypsin inhibitor heavy chain H5	Q86UX2	1	0	0	1	FALSE	Not applicable	Not applicable	Not applicable	Not applicable
ITM2A	Integral membrane protein 2A	O43736	0	0	1	1	TRUE	0	0	1	1
ITPA	Inosine triphosphate pyrophosphatase	Q9BY32	0	0	0	1	FALSE	Not applicable	Not applicable	Not applicable	Not applicable
ITPR1	Inositol 1,4,5-trisphosphate receptor type 1	Q14643	1	1	0	1	FALSE	Not applicable	Not applicable	Not applicable	Not applicable
ITPRIP	Inositol 1,4,5-trisphosphate receptor-interacting protein	Q8IWB1	0	0	0	1	FALSE	Not applicable	Not applicable	Not applicable	Not applicable
IVD	Isovaleryl-CoA dehydrogenase, mitochondrial	P26440	0	0	0	1	TRUE	0	0	0	1
IZUMO1	Izumo sperm-egg fusion protein 1	Q8IYV9	0	0	0	1	FALSE	Not applicable	Not applicable	Not applicable	Not applicable
JAM2	Junctional adhesion molecule B	P57087	0	0	0	1	TRUE	0	0	0	1
JAM3	Junctional adhesion molecule C	Q9BX67	1	1	0	1	FALSE	Not applicable	Not applicable	Not applicable	Not applicable
JCHAIN	Immunoglobulin J chain	P01591	0	0	0	1	TRUE	0	0	0	1
JMJD1C	Probable JmjC domain-containing histone demethylation protein 2C	Q15652	0	0	0	1	FALSE	Not applicable	Not applicable	Not applicable	Not applicable
JPT2	Jupiter microtubule associated homolog 2	Q9H910	0	0	0	1	FALSE	Not applicable	Not applicable	Not applicable	Not applicable
JUN	Transcription factor AP-1	P05412	0	1	0	1	TRUE	0	1	0	1
KAZALD1	Kazal-type serine protease inhibitor domain-containing protein 1	Q96I82	1	0	0	1	TRUE	1	0	0	1
KAZN	Kazrin	Q674X7	0	0	1	1	FALSE	Not applicable	Not applicable	Not applicable	Not applicable
KCNC4	Potassium voltage-gated channel subfamily C member 4	Q03721	0	0	0	1	FALSE	Not applicable	Not applicable	Not applicable	Not applicable
KCNH2	Potassium voltage-gated channel subfamily H member 2	Q12809	0	0	0	1	FALSE	Not applicable	Not applicable	Not applicable	Not applicable
KCNIP4	Kv channel-interacting protein 4	Q6PIL6	0	0	0	1	TRUE	0	0	0	1
KCTD5	BTB/POZ domain-containing protein KCTD5	Q9NXV2	0	0	0	1	FALSE	Not applicable	Not applicable	Not applicable	Not applicable
KDM3A	Lysine-specific demethylase 3A	Q9Y4C1	0	0	0	1	FALSE	Not applicable	Not applicable	Not applicable	Not applicable
KDR	Vascular endothelial growth factor receptor 2	P35968	0	1	0	1	TRUE	0	1	0	1
KEL	Kell blood group glycoprotein	P23276	0	0	0	1	TRUE	0	0	0	1
KHDC3L	KH domain-containing protein 3	Q587J8	0	0	0	1	FALSE	Not applicable	Not applicable	Not applicable	Not applicable
KHK	Ketohexokinase	P50053	0	0	0	1	FALSE	Not applicable	Not applicable	Not applicable	Not applicable
KIAA0319	Dyslexia-associated protein KIAA0319	Q5VV43	0	0	1	1	FALSE	Not applicable	Not applicable	Not applicable	Not applicable
KIAA1549	UPF0606 protein KIAA1549	Q9HCM3	0	0	0	1	FALSE	Not applicable	Not applicable	Not applicable	Not applicable
KIAA1549L	UPF0606 protein KIAA1549L	Q6ZVL6	0	0	0	1	FALSE	Not applicable	Not applicable	Not applicable	Not applicable
KIAA2013	Uncharacterized protein KIAA2013	Q8IYS2	0	0	0	1	FALSE	Not applicable	Not applicable	Not applicable	Not applicable
KIF1C	Kinesin-like protein KIF1C	O43896	0	0	0	1	FALSE	Not applicable	Not applicable	Not applicable	Not applicable
KIF20B	Kinesin-like protein KIF20B	Q96Q89	0	0	0	1	FALSE	Not applicable	Not applicable	Not applicable	Not applicable
KIF22	Kinesin-like protein KIF22	Q14807	0	0	0	1	FALSE	Not applicable	Not applicable	Not applicable	Not applicable
KIFBP	KIF-binding protein	Q96EK5	0	0	0	1	TRUE	0	0	0	1
KIR2DL2	Killer cell immunoglobulin-like receptor 2DL2	P43627	0	0	0	1	FALSE	Not applicable	Not applicable	Not applicable	Not applicable
KIR2DL3	Killer cell immunoglobulin-like receptor 2DL3	P43628	0	0	0	1	TRUE	0	0	0	1
KIR2DS4	Killer cell immunoglobulin-like receptor 2DS4	P43632	0	0	0	1	FALSE	Not applicable	Not applicable	Not applicable	Not applicable
KIR3DL1	Killer cell immunoglobulin-like receptor 3DL1	P43629	0	0	0	1	TRUE	0	0	0	1
KIR3DL2	Killer cell immunoglobulin-like receptor 3DL2	P43630	0	0	0	1	FALSE	Not applicable	Not applicable	Not applicable	Not applicable
KIRREL1	Kin of IRRE-like protein 1	Q96J84	0	0	0	1	FALSE	Not applicable	Not applicable	Not applicable	Not applicable
KIRREL2	Kin of IRRE-like protein 2	Q6UWL6	0	0	0	1	TRUE	0	0	0	1
KIT	Mast/stem cell growth factor receptor Kit	P10721	0	1	1	1	TRUE	0	1	1	1
KITLG	Kit ligand	P21583	0	0	0	1	TRUE	0	0	0	1
KLB	Beta-klotho	Q86Z14	0	0	0	1	TRUE	0	0	0	1
KLF4	Krueppel-like factor 4	O43474	0	1	0	1	FALSE	Not applicable	Not applicable	Not applicable	Not applicable
KLHL41	Kelch-like protein 41	O60662	0	0	0	1	FALSE	Not applicable	Not applicable	Not applicable	Not applicable
KLK1	Kallikrein-1	P06870	0	0	0	1	TRUE	0	0	0	1
KLK10	Kallikrein-10	O43240	0	0	0	1	TRUE	0	0	0	1
KLK11	Kallikrein-11	Q9UBX7	0	0	1	1	TRUE	0	0	1	1
KLK12	Kallikrein-12	Q9UKR0	0	0	0	1	TRUE	0	0	0	1
KLK13	Kallikrein-13	Q9UKR3	0	0	0	1	TRUE	0	0	0	1
KLK14	Kallikrein-14	Q9P0G3	0	0	0	1	TRUE	0	0	0	1
KLK15	Kallikrein-15	Q9H2R5	0	0	0	1	FALSE	Not applicable	Not applicable	Not applicable	Not applicable
KLK3	Prostate-specific antigen	P07288	0	0	0	1	FALSE	Not applicable	Not applicable	Not applicable	Not applicable
KLK4	Kallikrein-4	Q9Y5K2	0	0	1	1	TRUE	0	0	1	1
KLK6	Kallikrein-6	Q92876	0	0	0	1	TRUE	0	0	0	1
KLK7	Kallikrein-7	P49862	0	0	1	1	FALSE	Not applicable	Not applicable	Not applicable	Not applicable
KLK8	Kallikrein-8	O60259	0	0	0	1	TRUE	0	0	0	1
KLKB1	Plasma kallikrein	P03952	0	0	0	1	FALSE	Not applicable	Not applicable	Not applicable	Not applicable
KLRB1	Killer cell lectin-like receptor subfamily B member 1	Q12918	0	0	0	1	TRUE	0	0	0	1
KLRC1	NKG2-A/NKG2-B type II integral membrane protein	P26715	0	0	0	1	FALSE	Not applicable	Not applicable	Not applicable	Not applicable
KLRD1	Natural killer cells antigen CD94	Q13241	0	1	0	1	TRUE	0	1	0	1
KLRF1	Killer cell lectin-like receptor subfamily F member 1	Q9NZS2	0	0	0	1	FALSE	Not applicable	Not applicable	Not applicable	Not applicable
KLRK1	NKG2-D type II integral membrane protein	P26718	0	1	0	1	FALSE	Not applicable	Not applicable	Not applicable	Not applicable
KRT14	Keratin, type I cytoskeletal 14	P02533	0	0	0	1	TRUE	0	0	0	1
KRT17	Keratin, type I cytoskeletal 17	Q04695	1	0	0	1	FALSE	Not applicable	Not applicable	Not applicable	Not applicable
KRT18	Keratin, type I cytoskeletal 18	P05783	0	0	0	1	TRUE	0	0	0	1
KRT19	Keratin, type I cytoskeletal 19	P08727	0	0	0	1	TRUE	0	0	0	1
KRT5	Keratin, type II cytoskeletal 5	P13647	0	1	0	1	TRUE	0	1	0	1
KRT6C	Keratin, type II cytoskeletal 6C	P48668	0	0	0	1	FALSE	Not applicable	Not applicable	Not applicable	Not applicable
KRT8	Keratin, type II cytoskeletal 8	P05787	0	0	0	1	FALSE	Not applicable	Not applicable	Not applicable	Not applicable
KYAT1	Kynurenine--oxoglutarate transaminase 1	Q16773	0	0	0	1	TRUE	0	0	0	1
KYNU	Kynureninase	Q16719	0	0	0	1	TRUE	0	0	0	1
L1CAM	Neural cell adhesion molecule L1	P32004	0	0	1	1	TRUE	0	0	1	1
L3HYPDH	Trans-3-hydroxy-L-proline dehydratase	Q96EM0	0	0	0	1	FALSE	Not applicable	Not applicable	Not applicable	Not applicable
LACRT	Extracellular glycoprotein lacritin	Q9GZZ8	0	0	0	1	FALSE	Not applicable	Not applicable	Not applicable	Not applicable
LACTB2	Endoribonuclease LACTB2	Q53H82	0	0	0	1	TRUE	0	0	0	1
LAG3	Lymphocyte activation gene 3 protein	P18627	0	0	0	1	TRUE	0	0	0	1
LAIR1	Leukocyte-associated immunoglobulin-like receptor 1	Q6GTX8	0	0	0	1	TRUE	0	0	0	1
LAIR2	Leukocyte-associated immunoglobulin-like receptor 2	Q6ISS4	0	0	0	1	TRUE	0	0	0	1
LAMA1	Laminin subunit alpha-1	P25391	0	0	0	1	FALSE	Not applicable	Not applicable	Not applicable	Not applicable
LAMA4	Laminin subunit alpha-4	Q16363	0	0	0	1	TRUE	0	0	0	1
LAMB1	Laminin subunit beta-1	P07942	0	0	0	1	FALSE	Not applicable	Not applicable	Not applicable	Not applicable
LAMP1	Lysosome-associated membrane glycoprotein 1	P11279	0	0	1	1	FALSE	Not applicable	Not applicable	Not applicable	Not applicable
LAMP2	Lysosome-associated membrane glycoprotein 2	P13473	0	0	0	1	TRUE	0	0	0	1
LAMP3	Lysosome-associated membrane glycoprotein 3	Q9UQV4	0	0	0	1	TRUE	0	0	0	1
LAMTOR5	Ragulator complex protein LAMTOR5	O43504	0	0	0	1	FALSE	Not applicable	Not applicable	Not applicable	Not applicable
LAP3	Cytosol aminopeptidase	P28838	0	0	0	1	TRUE	0	0	0	1
LARP1	La-related protein 1	Q6PKG0	0	0	1	1	FALSE	Not applicable	Not applicable	Not applicable	Not applicable
LAT	Linker for activation of T-cells family member 1	O43561	1	1	0	1	TRUE	1	1	0	1
LAT2	Linker for activation of T-cells family member 2	Q9GZY6	0	0	0	1	TRUE	0	0	0	1
LATS1	Serine/threonine-protein kinase LATS1	O95835	0	0	0	1	FALSE	Not applicable	Not applicable	Not applicable	Not applicable
LAYN	Layilin	Q6UX15	0	0	0	1	TRUE	0	0	0	1
LBP	Lipopolysaccharide-binding protein	P18428	1	1	0	1	TRUE	1	1	0	1
LBR	Delta(14)-sterol reductase LBR	Q14739	0	0	1	1	TRUE	0	0	1	1
LCAT	Phosphatidylcholine-sterol acyltransferase	P04180	0	1	1	1	FALSE	Not applicable	Not applicable	Not applicable	Not applicable
LCN15	Lipocalin-15	Q6UWW0	0	0	0	1	FALSE	Not applicable	Not applicable	Not applicable	Not applicable
LCN2	Neutrophil gelatinase-associated lipocalin	P80188	0	1	0	1	TRUE	0	1	0	1
LCP1	Plastin-2	P13796	0	0	0	1	FALSE	Not applicable	Not applicable	Not applicable	Not applicable
LDLR	Low-density lipoprotein receptor	P01130	0	1	0	1	TRUE	0	1	0	1
LDLRAP1	Low density lipoprotein receptor adapter protein 1	Q5SW96	0	1	0	1	FALSE	Not applicable	Not applicable	Not applicable	Not applicable
LECT2	Leukocyte cell-derived chemotaxin-2	O14960	0	0	0	1	FALSE	Not applicable	Not applicable	Not applicable	Not applicable
LEFTY2	Left-right determination factor 2	O00292	1	0	1	1	TRUE	1	0	1	1
LEG1	Protein LEG1 homolog	Q6P5S2	0	0	0	1	FALSE	Not applicable	Not applicable	Not applicable	Not applicable
LELP1	Late cornified envelope-like proline-rich protein 1	Q5T871	0	0	0	1	FALSE	Not applicable	Not applicable	Not applicable	Not applicable
LEO1	RNA polymerase-associated protein LEO1	Q8WVC0	0	0	0	1	FALSE	Not applicable	Not applicable	Not applicable	Not applicable
LEP	Leptin	P41159	1	1	0	1	TRUE	1	1	0	1
LEPR	Leptin receptor	P48357	0	1	1	1	TRUE	0	1	1	1
LETM1	Mitochondrial proton/calcium exchanger protein	O95202	0	0	0	1	FALSE	Not applicable	Not applicable	Not applicable	Not applicable
LGALS1	Galectin-1	P09382	0	0	0	1	TRUE	0	0	0	1
LGALS3	Galectin-3	P17931	0	1	0	1	TRUE	0	1	0	1
LGALS3BP	Galectin-3-binding protein	Q08380	0	0	0	1	FALSE	Not applicable	Not applicable	Not applicable	Not applicable
LGALS4	Galectin-4	P56470	0	0	0	1	TRUE	0	0	0	1
LGALS7_LGALS7B	Galectin-7	P47929	0	0	0	1	TRUE	0	0	0	1
LGALS8	Galectin-8	O00214	0	0	0	1	TRUE	0	0	0	1
LGALS9	Galectin-9	O00182	0	0	1	1	TRUE	0	0	1	1
LGMN	Legumain	Q99538	0	1	0	1	TRUE	0	1	0	1
LHB	Lutropin subunit beta	P01229	0	0	0	1	TRUE	0	0	0	1
LHPP	Phospholysine phosphohistidine inorganic pyrophosphate phosphatase	Q9H008	0	0	0	1	TRUE	0	0	0	1
LIF	Leukemia inhibitory factor	P15018	0	0	0	1	TRUE	0	0	0	1
LIFR	Leukemia inhibitory factor receptor	P42702	0	0	0	1	TRUE	0	0	0	1
LILRA2	Leukocyte immunoglobulin-like receptor subfamily A member 2	Q8N149	0	0	0	1	TRUE	0	0	0	1
LILRA3	Leukocyte immunoglobulin-like receptor subfamily A member 3	Q8N6C8	0	0	0	1	FALSE	Not applicable	Not applicable	Not applicable	Not applicable
LILRA4	Leukocyte immunoglobulin-like receptor subfamily A member 4	P59901	0	0	0	1	FALSE	Not applicable	Not applicable	Not applicable	Not applicable
LILRA5	Leukocyte immunoglobulin-like receptor subfamily A member 5	A6NI73	0	0	0	1	TRUE	0	0	0	1
LILRA6	Leukocyte immunoglobulin-like receptor subfamily A member 6	Q6PI73	0	0	0	1	FALSE	Not applicable	Not applicable	Not applicable	Not applicable
LILRB1	Leukocyte immunoglobulin-like receptor subfamily B member 1	Q8NHL6	0	0	0	1	TRUE	0	0	0	1
LILRB2	Leukocyte immunoglobulin-like receptor subfamily B member 2	Q8N423	0	0	0	1	TRUE	0	0	0	1
LILRB4	Leukocyte immunoglobulin-like receptor subfamily B member 4	Q8NHJ6	0	0	1	1	TRUE	0	0	1	1
LILRB5	Leukocyte immunoglobulin-like receptor subfamily B member 5	O75023	0	0	0	1	TRUE	0	0	0	1
LIPF	Gastric triacylglycerol lipase	P07098	0	0	0	1	FALSE	Not applicable	Not applicable	Not applicable	Not applicable
LMNB1	Lamin-B1	P20700	0	1	0	1	FALSE	Not applicable	Not applicable	Not applicable	Not applicable
LMNB2	Lamin-B2	Q03252	0	0	0	1	FALSE	Not applicable	Not applicable	Not applicable	Not applicable
LMOD1	Leiomodin-1	P29536	1	0	1	1	FALSE	Not applicable	Not applicable	Not applicable	Not applicable
LMOD2	Leiomodin-2	Q6P5Q4	0	0	0	1	FALSE	Not applicable	Not applicable	Not applicable	Not applicable
LONP1	Lon protease homolog, mitochondrial	P36776	0	0	0	1	FALSE	Not applicable	Not applicable	Not applicable	Not applicable
LPA	Apolipoprotein(a)	P08519	0	1	1	1	FALSE	Not applicable	Not applicable	Not applicable	Not applicable
LPCAT2	Lysophosphatidylcholine acyltransferase 2	Q7L5N7	0	0	0	1	TRUE	0	0	0	1
LPL	Lipoprotein lipase	P06858	0	1	1	1	TRUE	0	1	1	1
LPO	Lactoperoxidase	P22079	0	0	0	1	TRUE	0	0	0	1
LPP	Lipoma-preferred partner	Q93052	1	1	0	1	FALSE	Not applicable	Not applicable	Not applicable	Not applicable
LRCH4	Leucine-rich repeat and calponin homology domain-containing protein 4	O75427	0	0	0	1	FALSE	Not applicable	Not applicable	Not applicable	Not applicable
LRFN2	Leucine-rich repeat and fibronectin type-III domain-containing protein 2	Q9ULH4	0	0	1	1	FALSE	Not applicable	Not applicable	Not applicable	Not applicable
LRG1	Leucine-rich alpha-2-glycoprotein	P02750	0	0	1	1	FALSE	Not applicable	Not applicable	Not applicable	Not applicable
LRIG1	Leucine-rich repeats and immunoglobulin-like domains protein 1	Q96JA1	0	0	0	1	TRUE	0	0	0	1
LRIG3	Leucine-rich repeats and immunoglobulin-like domains protein 3	Q6UXM1	0	0	0	1	FALSE	Not applicable	Not applicable	Not applicable	Not applicable
LRP1	Prolow-density lipoprotein receptor-related protein 1	Q07954	0	1	0	1	TRUE	0	1	0	1
LRP11	Low-density lipoprotein receptor-related protein 11	Q86VZ4	0	0	0	1	TRUE	0	0	0	1
LRP2	Low-density lipoprotein receptor-related protein 2	P98164	0	1	0	1	FALSE	Not applicable	Not applicable	Not applicable	Not applicable
LRP2BP	LRP2-binding protein	Q9P2M1	0	0	0	1	FALSE	Not applicable	Not applicable	Not applicable	Not applicable
LRPAP1	Alpha-2-macroglobulin receptor-associated protein	P30533	0	0	0	1	TRUE	0	0	0	1
LRRC25	Leucine-rich repeat-containing protein 25	Q8N386	0	0	0	1	TRUE	0	0	0	1
LRRC37A2	Leucine-rich repeat-containing protein 37A2	A6NM11	0	0	0	1	FALSE	Not applicable	Not applicable	Not applicable	Not applicable
LRRC38	Leucine-rich repeat-containing protein 38	Q5VT99	0	0	0	1	FALSE	Not applicable	Not applicable	Not applicable	Not applicable
LRRC59	Leucine-rich repeat-containing protein 59	Q96AG4	0	0	0	1	FALSE	Not applicable	Not applicable	Not applicable	Not applicable
LRRFIP1	Leucine-rich repeat flightless-interacting protein 1	Q32MZ4	0	0	0	1	FALSE	Not applicable	Not applicable	Not applicable	Not applicable
LRRN1	Leucine-rich repeat neuronal protein 1	Q6UXK5	0	0	1	1	TRUE	0	0	1	1
LRTM1	Leucine-rich repeat and transmembrane domain-containing protein 1	Q9HBL6	0	1	1	1	FALSE	Not applicable	Not applicable	Not applicable	Not applicable
LRTM2	Leucine-rich repeat and transmembrane domain-containing protein 2	Q8N967	0	0	0	1	FALSE	Not applicable	Not applicable	Not applicable	Not applicable
LSM1	U6 snRNA-associated Sm-like protein LSm1	O15116	0	0	0	1	TRUE	0	0	0	1
LSM8	U6 snRNA-associated Sm-like protein LSm8	O95777	0	0	0	1	FALSE	Not applicable	Not applicable	Not applicable	Not applicable
LSP1	Lymphocyte-specific protein 1	P33241	0	0	0	1	TRUE	0	0	0	1
LTA	Lymphotoxin-alpha	P01374	0	1	0	1	TRUE	0	1	0	1
LTA4H	Leukotriene A-4 hydrolase	P09960	0	1	0	1	TRUE	0	1	0	1
LTB	Lymphotoxin-beta	Q06643	0	1	1	1	FALSE	Not applicable	Not applicable	Not applicable	Not applicable
LTBP2	Latent-transforming growth factor beta-binding protein 2	Q14767	1	0	1	1	TRUE	1	0	1	1
LTBP3	Latent-transforming growth factor beta-binding protein 3	Q9NS15	0	0	0	1	TRUE	0	0	0	1
LTBR	Tumor necrosis factor receptor superfamily member 3	P36941	0	1	0	1	TRUE	0	1	0	1
LTO1	Protein LTO1 homolog	Q8WV07	0	0	0	1	TRUE	0	0	0	1
LUZP2	Leucine zipper protein 2	Q86TE4	1	0	0	1	FALSE	Not applicable	Not applicable	Not applicable	Not applicable
LXN	Latexin	Q9BS40	0	0	0	1	TRUE	0	0	0	1
LY6D	Lymphocyte antigen 6D	Q14210	0	0	0	1	TRUE	0	0	0	1
LY75	Lymphocyte antigen 75	O60449	0	1	0	1	TRUE	0	1	0	1
LY9	T-lymphocyte surface antigen Ly-9	Q9HBG7	0	0	0	1	TRUE	0	0	0	1
LY96	Lymphocyte antigen 96	Q9Y6Y9	0	1	0	1	TRUE	0	1	0	1
LYAR	Cell growth-regulating nucleolar protein	Q9NX58	0	0	0	1	TRUE	0	0	0	1
LYN	Tyrosine-protein kinase Lyn	P07948	0	1	0	1	TRUE	0	1	0	1
LYPD1	Ly6/PLAUR domain-containing protein 1	Q8N2G4	0	0	0	1	TRUE	0	0	0	1
LYPD3	Ly6/PLAUR domain-containing protein 3	O95274	0	0	1	1	TRUE	0	0	1	1
LYPD8	Ly6/PLAUR domain-containing protein 8	Q6UX82	0	0	0	1	TRUE	0	0	0	1
LYPLA2	Acyl-protein thioesterase 2	O95372	0	0	0	1	FALSE	Not applicable	Not applicable	Not applicable	Not applicable
LYSMD3	LysM and putative peptidoglycan-binding domain-containing protein 3	Q7Z3D4	0	0	0	1	FALSE	Not applicable	Not applicable	Not applicable	Not applicable
LYVE1	Lymphatic vessel endothelial hyaluronic acid receptor 1	Q9Y5Y7	0	0	1	1	FALSE	Not applicable	Not applicable	Not applicable	Not applicable
LYZL2	Lysozyme-like protein 2	Q7Z4W2	0	0	0	1	FALSE	Not applicable	Not applicable	Not applicable	Not applicable
LZTFL1	Leucine zipper transcription factor-like protein 1	Q9NQ48	0	0	0	1	FALSE	Not applicable	Not applicable	Not applicable	Not applicable
M6PR	Cation-dependent mannose-6-phosphate receptor	P20645	0	0	0	1	FALSE	Not applicable	Not applicable	Not applicable	Not applicable
MAD1L1	Mitotic spindle assembly checkpoint protein MAD1	Q9Y6D9	0	1	1	1	TRUE	0	1	1	1
MAEA	E3 ubiquitin-protein transferase MAEA	Q7L5Y9	0	0	0	1	TRUE	0	0	0	1
MAG	Myelin-associated glycoprotein	P20916	0	0	0	1	FALSE	Not applicable	Not applicable	Not applicable	Not applicable
MAGEA3	Melanoma-associated antigen 3	P43357	0	0	0	1	FALSE	Not applicable	Not applicable	Not applicable	Not applicable
MAGED1	Melanoma-associated antigen D1	Q9Y5V3	0	0	0	1	TRUE	0	0	0	1
MAMDC2	MAM domain-containing protein 2	Q7Z304	1	0	0	1	FALSE	Not applicable	Not applicable	Not applicable	Not applicable
MAMDC4	Apical endosomal glycoprotein	Q6UXC1	0	0	1	1	FALSE	Not applicable	Not applicable	Not applicable	Not applicable
MAN1A2	Mannosyl-oligosaccharide 1,2-alpha-mannosidase IB	O60476	0	0	0	1	FALSE	Not applicable	Not applicable	Not applicable	Not applicable
MAN2B2	Epididymis-specific alpha-mannosidase	Q9Y2E5	0	0	0	1	FALSE	Not applicable	Not applicable	Not applicable	Not applicable
MANEAL	Glycoprotein endo-alpha-1,2-mannosidase-like protein	Q5VSG8	0	0	0	1	FALSE	Not applicable	Not applicable	Not applicable	Not applicable
MANF	Mesencephalic astrocyte-derived neurotrophic factor	P55145	0	0	0	1	TRUE	0	0	0	1
MANSC1	MANSC domain-containing protein 1	Q9H8J5	0	0	1	1	TRUE	0	0	1	1
MANSC4	MANSC domain-containing protein 4	A6NHS7	0	0	0	1	FALSE	Not applicable	Not applicable	Not applicable	Not applicable
MAP1LC3A	Microtubule-associated proteins 1A/1B light chain 3A	Q9H492	0	0	0	1	FALSE	Not applicable	Not applicable	Not applicable	Not applicable
MAP1LC3B2	Microtubule-associated proteins 1A/1B light chain 3 beta 2	A6NCE7	0	0	0	1	FALSE	Not applicable	Not applicable	Not applicable	Not applicable
MAP2	Microtubule-associated protein 2	P11137	0	0	0	1	FALSE	Not applicable	Not applicable	Not applicable	Not applicable
MAP2K1	Dual specificity mitogen-activated protein kinase kinase 1	Q02750	0	1	0	1	FALSE	Not applicable	Not applicable	Not applicable	Not applicable
MAP2K6	Dual specificity mitogen-activated protein kinase kinase 6	P52564	0	1	0	1	TRUE	0	1	0	1
MAP3K5	Mitogen-activated protein kinase kinase kinase 5	Q99683	0	1	0	1	TRUE	0	1	0	1
MAP4K5	Mitogen-activated protein kinase kinase kinase kinase 5	Q9Y4K4	0	0	0	1	TRUE	0	0	0	1
MAPK13	Mitogen-activated protein kinase 13	O15264	0	1	0	1	FALSE	Not applicable	Not applicable	Not applicable	Not applicable
MAPK9	Mitogen-activated protein kinase 9	P45984	0	1	0	1	TRUE	0	1	0	1
MAPKAPK2	MAP kinase-activated protein kinase 2	P49137	0	0	0	1	FALSE	Not applicable	Not applicable	Not applicable	Not applicable
MAPRE3	Microtubule-associated protein RP/EB family member 3	Q9UPY8	0	0	0	1	FALSE	Not applicable	Not applicable	Not applicable	Not applicable
MAPT	Microtubule-associated protein tau	P10636	0	0	0	1	TRUE	0	0	0	1
MARCO	Macrophage receptor MARCO	Q9UEW3	0	1	0	1	TRUE	0	1	0	1
MARS1	Methionine--tRNA ligase, cytoplasmic	P56192	0	0	0	1	FALSE	Not applicable	Not applicable	Not applicable	Not applicable
MASP1	Mannan-binding lectin serine protease 1	P48740	0	0	1	1	TRUE	0	0	1	1
MATN2	Matrilin-2	O00339	0	0	0	1	TRUE	0	0	0	1
MATN3	Matrilin-3	O15232	0	0	1	1	TRUE	0	0	1	1
MAVS	Mitochondrial antiviral-signaling protein	Q7Z434	0	0	0	1	TRUE	0	0	0	1
MAX	Protein max	P61244	0	0	0	1	TRUE	0	0	0	1
MB	Myoglobin	P02144	0	0	0	1	TRUE	0	0	0	1
MBL2	Mannose-binding protein C	P11226	0	1	0	1	FALSE	Not applicable	Not applicable	Not applicable	Not applicable
MCAM	Cell surface glycoprotein MUC18	P43121	1	0	1	1	TRUE	1	0	1	1
MCEE	Methylmalonyl-CoA epimerase, mitochondrial	Q96PE7	0	0	0	1	FALSE	Not applicable	Not applicable	Not applicable	Not applicable
MCEMP1	Mast cell-expressed membrane protein 1	Q8IX19	0	0	0	1	FALSE	Not applicable	Not applicable	Not applicable	Not applicable
MCFD2	Multiple coagulation factor deficiency protein 2	Q8NI22	0	0	0	1	TRUE	0	0	0	1
MCTS1	Malignant T-cell-amplified sequence 1	Q9ULC4	0	0	0	1	FALSE	Not applicable	Not applicable	Not applicable	Not applicable
MDGA1	MAM domain-containing glycosylphosphatidylinositol anchor protein 1	Q8NFP4	0	0	1	1	TRUE	0	0	1	1
MDH1	Malate dehydrogenase, cytoplasmic	P40925	0	0	0	1	FALSE	Not applicable	Not applicable	Not applicable	Not applicable
MDK	Midkine	P21741	0	0	0	1	TRUE	0	0	0	1
MDM1	Nuclear protein MDM1	Q8TC05	0	0	0	1	FALSE	Not applicable	Not applicable	Not applicable	Not applicable
MECR	Enoyl-[acyl-carrier-protein] reductase, mitochondrial	Q9BV79	0	0	0	1	FALSE	Not applicable	Not applicable	Not applicable	Not applicable
MED18	Mediator of RNA polymerase II transcription subunit 18	Q9BUE0	0	0	0	1	TRUE	0	0	0	1
MED21	Mediator of RNA polymerase II transcription subunit 21	Q13503	0	0	0	1	FALSE	Not applicable	Not applicable	Not applicable	Not applicable
MEGF10	Multiple epidermal growth factor-like domains protein 10	Q96KG7	0	0	1	1	TRUE	0	0	1	1
MEGF11	Multiple epidermal growth factor-like domains protein 11	A6BM72	0	0	0	1	FALSE	Not applicable	Not applicable	Not applicable	Not applicable
MEGF9	Multiple epidermal growth factor-like domains protein 9	Q9H1U4	0	1	0	1	TRUE	0	1	0	1
MELTF	Melanotransferrin	P08582	0	0	0	1	FALSE	Not applicable	Not applicable	Not applicable	Not applicable
MENT	Protein MENT	Q9BUN1	0	0	1	1	FALSE	Not applicable	Not applicable	Not applicable	Not applicable
MEP1A	Meprin A subunit alpha	Q16819	0	0	0	1	FALSE	Not applicable	Not applicable	Not applicable	Not applicable
MEP1B	Meprin A subunit beta	Q16820	0	0	1	1	TRUE	0	0	1	1
MEPE	Matrix extracellular phosphoglycoprotein	Q9NQ76	0	0	0	1	TRUE	0	0	0	1
MERTK	Tyrosine-protein kinase Mer	Q12866	0	1	0	1	TRUE	0	1	0	1
MESD	LRP chaperone MESD	Q14696	0	0	0	1	TRUE	0	0	0	1
MET	Hepatocyte growth factor receptor	P08581	0	0	1	1	TRUE	0	0	1	1
METAP1	Methionine aminopeptidase 1	P53582	0	0	0	1	TRUE	0	0	0	1
METAP1D	Methionine aminopeptidase 1D, mitochondrial	Q6UB28	0	0	0	1	TRUE	0	0	0	1
METAP2	Methionine aminopeptidase 2	P50579	0	0	0	1	TRUE	0	0	0	1
MFAP3	Microfibril-associated glycoprotein 3	P55082	0	0	0	1	TRUE	0	0	0	1
MFAP3L	Microfibrillar-associated protein 3-like	O75121	0	0	0	1	FALSE	Not applicable	Not applicable	Not applicable	Not applicable
MFAP4	Microfibril-associated glycoprotein 4	P55083	1	0	1	1	FALSE	Not applicable	Not applicable	Not applicable	Not applicable
MFAP5	Microfibrillar-associated protein 5	Q13361	1	0	0	1	TRUE	1	0	0	1
MFGE8	Lactadherin	Q08431	1	1	0	1	TRUE	1	1	0	1
MGLL	Monoglyceride lipase	Q99685	0	0	0	1	TRUE	0	0	0	1
MGMT	Methylated-DNA--protein-cysteine methyltransferase	P16455	0	0	0	1	TRUE	0	0	0	1
MIA	Melanoma-derived growth regulatory protein	Q16674	0	0	0	1	TRUE	0	0	0	1
MICALL2	MICAL-like protein 2	Q8IY33	0	0	0	1	FALSE	Not applicable	Not applicable	Not applicable	Not applicable
MICB_MICA	MHC class I polypeptide-related sequence A_MHC class I polypeptide-related sequence B	Q29980_Q29983	0	0	0	1	TRUE	0	0	0	1
MIF	Macrophage migration inhibitory factor	P14174	0	1	0	1	TRUE	0	1	0	1
MILR1	Allergin-1	Q7Z6M3	0	0	0	1	TRUE	0	0	0	1
MINDY1	Ubiquitin carboxyl-terminal hydrolase MINDY-1	Q8N5J2	0	0	0	1	FALSE	Not applicable	Not applicable	Not applicable	Not applicable
MINK1	Misshapen-like kinase 1	Q8N4C8	0	0	0	1	FALSE	Not applicable	Not applicable	Not applicable	Not applicable
MITD1	MIT domain-containing protein 1	Q8WV92	0	0	0	1	TRUE	0	0	0	1
MKI67	Proliferation marker protein Ki-67	P46013	0	1	0	1	FALSE	Not applicable	Not applicable	Not applicable	Not applicable
MLLT1	Protein ENL	Q03111	0	0	0	1	FALSE	Not applicable	Not applicable	Not applicable	Not applicable
MLN	Promotilin	P12872	0	0	0	1	TRUE	0	0	0	1
MME	Neprilysin	P08473	0	0	0	1	TRUE	0	0	0	1
MMP1	Interstitial collagenase	P03956	0	1	0	1	TRUE	0	1	0	1
MMP10	Stromelysin-2	P09238	0	0	0	1	TRUE	0	0	0	1
MMP12	Macrophage metalloelastase	P39900	0	1	1	1	TRUE	0	1	1	1
MMP13	Collagenase 3	P45452	0	1	0	1	TRUE	0	1	0	1
MMP15	Matrix metalloproteinase-15	P51511	0	0	0	1	FALSE	Not applicable	Not applicable	Not applicable	Not applicable
MMP3	Stromelysin-1	P08254	0	1	0	1	TRUE	0	1	0	1
MMP7	Matrilysin	P09237	0	1	1	1	TRUE	0	1	1	1
MMP8	Neutrophil collagenase	P22894	0	1	0	1	TRUE	0	1	0	1
MMP9	Matrix metalloproteinase-9	P14780	0	1	0	1	TRUE	0	1	0	1
MMUT	Methylmalonyl-CoA mutase, mitochondrial	P22033	0	0	0	1	FALSE	Not applicable	Not applicable	Not applicable	Not applicable
MN1	Transcriptional activator MN1	Q10571	1	1	0	1	FALSE	Not applicable	Not applicable	Not applicable	Not applicable
MNAT1	CDK-activating kinase assembly factor MAT1	P51948	0	0	0	1	FALSE	Not applicable	Not applicable	Not applicable	Not applicable
MNDA	Myeloid cell nuclear differentiation antigen	P41218	0	1	0	1	TRUE	0	1	0	1
MOCS2	Molybdopterin synthase catalytic subunit	O96007	0	0	0	1	FALSE	Not applicable	Not applicable	Not applicable	Not applicable
MOG	Myelin-oligodendrocyte glycoprotein	Q16653	0	0	0	1	TRUE	0	0	0	1
MORC3	MORC family CW-type zinc finger protein 3	Q14149	0	0	0	1	FALSE	Not applicable	Not applicable	Not applicable	Not applicable
MORF4L1	Mortality factor 4-like protein 1	Q9UBU8	0	0	0	1	FALSE	Not applicable	Not applicable	Not applicable	Not applicable
MORF4L2	Mortality factor 4-like protein 2	Q15014	0	0	0	1	FALSE	Not applicable	Not applicable	Not applicable	Not applicable
MORN4	MORN repeat-containing protein 4	Q8NDC4	0	0	0	1	FALSE	Not applicable	Not applicable	Not applicable	Not applicable
MPHOSPH8	M-phase phosphoprotein 8	Q99549	0	0	0	1	TRUE	0	0	0	1
MPI	Mannose-6-phosphate isomerase	P34949	0	0	0	1	TRUE	0	0	0	1
MPIG6B	Megakaryocyte and platelet inhibitory receptor G6b	O95866	0	0	0	1	TRUE	0	0	0	1
MPO	Myeloperoxidase	P05164	0	1	0	1	TRUE	0	1	0	1
MPRIP	Myosin phosphatase Rho-interacting protein	Q6WCQ1	0	1	0	1	FALSE	Not applicable	Not applicable	Not applicable	Not applicable
MRC1	Macrophage mannose receptor 1	P22897	0	0	1	1	FALSE	Not applicable	Not applicable	Not applicable	Not applicable
MRI1	Methylthioribose-1-phosphate isomerase	Q9BV20	0	0	0	1	FALSE	Not applicable	Not applicable	Not applicable	Not applicable
MRPL24	39S ribosomal protein L24, mitochondrial	Q96A35	0	0	0	1	FALSE	Not applicable	Not applicable	Not applicable	Not applicable
MRPL28	39S ribosomal protein L28, mitochondrial	Q13084	0	0	0	1	FALSE	Not applicable	Not applicable	Not applicable	Not applicable
MRPL46	39S ribosomal protein L46, mitochondrial	Q9H2W6	0	0	0	1	TRUE	0	0	0	1
MRPL52	39S ribosomal protein L52, mitochondrial	Q86TS9	0	0	0	1	FALSE	Not applicable	Not applicable	Not applicable	Not applicable
MRPL58	Peptidyl-tRNA hydrolase ICT1, mitochondrial	Q14197	0	0	0	1	FALSE	Not applicable	Not applicable	Not applicable	Not applicable
MRPS16	28S ribosomal protein S16, mitochondrial	Q9Y3D3	0	0	0	1	FALSE	Not applicable	Not applicable	Not applicable	Not applicable
MSLN	Mesothelin	Q13421	0	0	0	1	TRUE	0	0	0	1
MSLNL	Mesothelin-like protein	Q96KJ4	0	0	0	1	FALSE	Not applicable	Not applicable	Not applicable	Not applicable
MSMB	Beta-microseminoprotein	P08118	0	0	0	1	TRUE	0	0	0	1
MSR1	Macrophage scavenger receptor types I and II	P21757	1	1	0	1	TRUE	1	1	0	1
MSRA	Mitochondrial peptide methionine sulfoxide reductase	Q9UJ68	0	1	0	1	TRUE	0	1	0	1
MST1	Hepatocyte growth factor-like protein	P26927	0	0	0	1	FALSE	Not applicable	Not applicable	Not applicable	Not applicable
MSTN	Growth/differentiation factor 8	O14793	0	1	0	1	TRUE	0	1	0	1
MTDH	Protein LYRIC	Q86UE4	0	0	0	1	FALSE	Not applicable	Not applicable	Not applicable	Not applicable
MTHFD2	Bifunctional methylenetetrahydrofolate dehydrogenase/cyclohydrolase, mitochondrial	P13995	1	0	0	1	FALSE	Not applicable	Not applicable	Not applicable	Not applicable
MTHFSD	Methenyltetrahydrofolate synthase domain-containing protein	Q2M296	0	0	1	1	FALSE	Not applicable	Not applicable	Not applicable	Not applicable
MTIF3	Translation initiation factor IF-3, mitochondrial	Q9H2K0	0	0	0	1	FALSE	Not applicable	Not applicable	Not applicable	Not applicable
MTPN	Myotrophin	P58546	0	1	0	1	TRUE	0	1	0	1
MTR	Methionine synthase	Q99707	0	1	0	1	FALSE	Not applicable	Not applicable	Not applicable	Not applicable
MTSS1	Protein MTSS 1	O43312	0	1	1	1	FALSE	Not applicable	Not applicable	Not applicable	Not applicable
MTSS2	Protein MTSS 2	Q765P7	0	0	0	1	FALSE	Not applicable	Not applicable	Not applicable	Not applicable
MTUS1	Microtubule-associated tumor suppressor 1	Q9ULD2	0	0	0	1	FALSE	Not applicable	Not applicable	Not applicable	Not applicable
MUC13	Mucin-13	Q9H3R2	0	0	0	1	TRUE	0	0	0	1
MUC16	Mucin-16	Q8WXI7	0	0	0	1	TRUE	0	0	0	1
MUC2	Mucin-2	Q02817	0	0	0	1	FALSE	Not applicable	Not applicable	Not applicable	Not applicable
MUCL3	Mucin-like protein 3	Q3MIW9	0	0	0	1	FALSE	Not applicable	Not applicable	Not applicable	Not applicable
MVK	Mevalonate kinase	Q03426	0	1	1	1	TRUE	0	1	1	1
MXRA8	Matrix remodeling-associated protein 8	Q9BRK3	0	0	1	1	FALSE	Not applicable	Not applicable	Not applicable	Not applicable
MYBPC1	Myosin-binding protein C, slow-type	Q00872	0	0	0	1	FALSE	Not applicable	Not applicable	Not applicable	Not applicable
MYBPC2	Myosin-binding protein C, fast-type	Q14324	0	0	0	1	FALSE	Not applicable	Not applicable	Not applicable	Not applicable
MYCBP2	E3 ubiquitin-protein ligase MYCBP2	O75592	0	0	0	1	FALSE	Not applicable	Not applicable	Not applicable	Not applicable
MYDGF	Myeloid-derived growth factor	Q969H8	0	1	0	1	FALSE	Not applicable	Not applicable	Not applicable	Not applicable
MYH4	Myosin-4	Q9Y623	0	0	0	1	FALSE	Not applicable	Not applicable	Not applicable	Not applicable
MYH7B	Myosin-7B	A7E2Y1	0	0	0	1	FALSE	Not applicable	Not applicable	Not applicable	Not applicable
MYH9	Myosin-9	P35579	1	1	0	1	FALSE	Not applicable	Not applicable	Not applicable	Not applicable
MYL1	Myosin light chain 1/3, skeletal muscle isoform	P05976	0	0	0	1	FALSE	Not applicable	Not applicable	Not applicable	Not applicable
MYL3	Myosin light chain 3	P08590	0	0	0	1	FALSE	Not applicable	Not applicable	Not applicable	Not applicable
MYL4	Myosin light chain 4	P12829	0	0	0	1	FALSE	Not applicable	Not applicable	Not applicable	Not applicable
MYL6B	Myosin light chain 6B	P14649	0	0	0	1	FALSE	Not applicable	Not applicable	Not applicable	Not applicable
MYLPF	Myosin regulatory light chain 2, skeletal muscle isoform	Q96A32	0	0	0	1	FALSE	Not applicable	Not applicable	Not applicable	Not applicable
MYO6	Unconventional myosin-VI	Q9UM54	0	0	0	1	FALSE	Not applicable	Not applicable	Not applicable	Not applicable
MYO9B	Unconventional myosin-IXb	Q13459	0	0	0	1	TRUE	0	0	0	1
MYOC	Myocilin	Q99972	1	0	0	1	TRUE	1	0	0	1
MYOM1	Myomesin-1	P52179	1	0	0	1	FALSE	Not applicable	Not applicable	Not applicable	Not applicable
MYOM2	Myomesin-2	P54296	0	1	0	1	FALSE	Not applicable	Not applicable	Not applicable	Not applicable
MYOM3	Myomesin-3	Q5VTT5	0	0	0	1	FALSE	Not applicable	Not applicable	Not applicable	Not applicable
MZB1	Marginal zone B- and B1-cell-specific protein	Q8WU39	0	0	0	1	TRUE	0	0	0	1
MZT1	Mitotic-spindle organizing protein 1	Q08AG7	0	0	0	1	TRUE	0	0	0	1
NAA10	N-alpha-acetyltransferase 10	P41227	0	0	0	1	FALSE	Not applicable	Not applicable	Not applicable	Not applicable
NAA80	N-alpha-acetyltransferase 80	Q93015	0	0	0	1	FALSE	Not applicable	Not applicable	Not applicable	Not applicable
NAAA	N-acylethanolamine-hydrolyzing acid amidase	Q02083	0	0	0	1	TRUE	0	0	0	1
NACC1	Nucleus accumbens-associated protein 1	Q96RE7	0	0	0	1	FALSE	Not applicable	Not applicable	Not applicable	Not applicable
NADK	NAD kinase	O95544	0	0	0	1	TRUE	0	0	0	1
NAGA	Alpha-N-acetylgalactosaminidase	P17050	0	0	0	1	FALSE	Not applicable	Not applicable	Not applicable	Not applicable
NAGK	N-acetyl-D-glucosamine kinase	Q9UJ70	0	0	0	1	FALSE	Not applicable	Not applicable	Not applicable	Not applicable
NAGPA	N-acetylglucosamine-1-phosphodiester alpha-N-acetylglucosaminidase	Q9UK23	0	0	0	1	FALSE	Not applicable	Not applicable	Not applicable	Not applicable
NAMPT	Nicotinamide phosphoribosyltransferase	P43490	0	1	0	1	TRUE	0	1	0	1
NAP1L4	Nucleosome assembly protein 1-like 4	Q99733	0	0	0	1	FALSE	Not applicable	Not applicable	Not applicable	Not applicable
NAPRT	Nicotinate phosphoribosyltransferase	Q6XQN6	0	0	0	1	FALSE	Not applicable	Not applicable	Not applicable	Not applicable
NARS1	Asparagine--tRNA ligase, cytoplasmic	O43776	0	0	0	1	FALSE	Not applicable	Not applicable	Not applicable	Not applicable
NBL1	Neuroblastoma suppressor of tumorigenicity 1	P41271	0	0	0	1	TRUE	0	0	0	1
NBN	Nibrin	O60934	0	0	0	1	TRUE	0	0	0	1
NCAM1	Neural cell adhesion molecule 1	P13591	0	0	0	1	TRUE	0	0	0	1
NCAM2	Neural cell adhesion molecule 2	O15394	0	0	1	1	TRUE	0	0	1	1
NCAN	Neurocan core protein	O14594	0	0	0	1	TRUE	0	0	0	1
NCF2	Neutrophil cytosol factor 2	P19878	0	1	0	1	TRUE	0	1	0	1
NCK2	Cytoplasmic protein NCK2	O43639	0	0	0	1	TRUE	0	0	0	1
NCLN	Nicalin	Q969V3	0	0	0	1	TRUE	0	0	0	1
NCR1	Natural cytotoxicity triggering receptor 1	O76036	0	0	0	1	TRUE	0	0	0	1
NCR3LG1	Natural cytotoxicity triggering receptor 3 ligand 1	Q68D85	0	0	1	1	FALSE	Not applicable	Not applicable	Not applicable	Not applicable
NCS1	Neuronal calcium sensor 1	P62166	0	0	0	1	TRUE	0	0	0	1
NDRG1	Protein NDRG1	Q92597	0	0	0	1	TRUE	0	0	0	1
NDST1	Bifunctional heparan sulfate N-deacetylase/N-sulfotransferase 1	P52848	0	0	0	1	FALSE	Not applicable	Not applicable	Not applicable	Not applicable
NDUFA5	NADH dehydrogenase [ubiquinone] 1 alpha subcomplex subunit 5	Q16718	0	0	0	1	FALSE	Not applicable	Not applicable	Not applicable	Not applicable
NDUFB7	NADH dehydrogenase [ubiquinone] 1 beta subcomplex subunit 7	P17568	0	0	0	1	FALSE	Not applicable	Not applicable	Not applicable	Not applicable
NDUFS6	NADH dehydrogenase [ubiquinone] iron-sulfur protein 6, mitochondrial	O75380	0	0	0	1	TRUE	0	0	0	1
NEB	Nebulin	P20929	0	0	0	1	FALSE	Not applicable	Not applicable	Not applicable	Not applicable
NECAP2	Adaptin ear-binding coat-associated protein 2	Q9NVZ3	0	0	0	1	FALSE	Not applicable	Not applicable	Not applicable	Not applicable
NECTIN1	Nectin-1	Q15223	0	0	1	1	FALSE	Not applicable	Not applicable	Not applicable	Not applicable
NECTIN2	Nectin-2	Q92692	0	1	0	1	TRUE	0	1	0	1
NECTIN4	Nectin-4	Q96NY8	0	0	0	1	TRUE	0	0	0	1
NEDD4L	E3 ubiquitin-protein ligase NEDD4-like	Q96PU5	0	0	0	1	FALSE	Not applicable	Not applicable	Not applicable	Not applicable
NEDD9	Enhancer of filamentation 1	Q14511	0	0	0	1	FALSE	Not applicable	Not applicable	Not applicable	Not applicable
NEFL	Neurofilament light polypeptide	P07196	0	0	0	1	TRUE	0	0	0	1
NEK7	Serine/threonine-protein kinase Nek7	Q8TDX7	0	0	0	1	FALSE	Not applicable	Not applicable	Not applicable	Not applicable
NELL1	Protein kinase C-binding protein NELL1	Q92832	0	0	1	1	TRUE	0	0	1	1
NELL2	Protein kinase C-binding protein NELL2	Q99435	0	0	1	1	TRUE	0	0	1	1
NENF	Neudesin	Q9UMX5	0	0	0	1	FALSE	Not applicable	Not applicable	Not applicable	Not applicable
NEO1	Neogenin	Q92859	0	0	1	1	FALSE	Not applicable	Not applicable	Not applicable	Not applicable
NEXN	Nexilin	Q0ZGT2	1	0	0	1	FALSE	Not applicable	Not applicable	Not applicable	Not applicable
NFASC	Neurofascin	O94856	0	0	0	1	TRUE	0	0	0	1
NFAT5	Nuclear factor of activated T-cells 5	O94916	0	1	0	1	FALSE	Not applicable	Not applicable	Not applicable	Not applicable
NFATC1	Nuclear factor of activated T-cells, cytoplasmic 1	O95644	0	1	0	1	TRUE	0	1	0	1
NFATC3	Nuclear factor of activated T-cells, cytoplasmic 3	Q12968	0	1	0	1	TRUE	0	1	0	1
NFE2	Transcription factor NF-E2 45 kDa subunit	Q16621	0	1	1	1	FALSE	Not applicable	Not applicable	Not applicable	Not applicable
NFIC	Nuclear factor 1 C-type	P08651	0	0	0	1	FALSE	Not applicable	Not applicable	Not applicable	Not applicable
NFKB1	Nuclear factor NF-kappa-B p105 subunit	P19838	0	1	1	1	FALSE	Not applicable	Not applicable	Not applicable	Not applicable
NFKB2	Nuclear factor NF-kappa-B p100 subunit	Q00653	0	1	0	1	FALSE	Not applicable	Not applicable	Not applicable	Not applicable
NFKBIE	NF-kappa-B inhibitor epsilon	O00221	0	0	0	1	TRUE	0	0	0	1
NFU1	NFU1 iron-sulfur cluster scaffold homolog, mitochondrial	Q9UMS0	0	0	0	1	FALSE	Not applicable	Not applicable	Not applicable	Not applicable
NFX1	Transcriptional repressor NF-X1	Q12986	0	0	0	1	FALSE	Not applicable	Not applicable	Not applicable	Not applicable
NFYA	Nuclear transcription factor Y subunit alpha	P23511	0	0	1	1	FALSE	Not applicable	Not applicable	Not applicable	Not applicable
NGF	Beta-nerve growth factor	P01138	1	0	0	1	TRUE	1	0	0	1
NGFR	Tumor necrosis factor receptor superfamily member 16	P08138	0	0	0	1	FALSE	Not applicable	Not applicable	Not applicable	Not applicable
NGRN	Neugrin	Q9NPE2	0	0	0	1	FALSE	Not applicable	Not applicable	Not applicable	Not applicable
NHLRC3	NHL repeat-containing protein 3	Q5JS37	0	0	0	1	FALSE	Not applicable	Not applicable	Not applicable	Not applicable
NID1	Nidogen-1	P14543	0	0	0	1	TRUE	0	0	0	1
NID2	Nidogen-2	Q14112	0	0	0	1	TRUE	0	0	0	1
NINJ1	Ninjurin-1	Q92982	0	0	0	1	TRUE	0	0	0	1
NIT1	Deaminated glutathione amidase	Q86X76	0	0	1	1	FALSE	Not applicable	Not applicable	Not applicable	Not applicable
NIT2	Omega-amidase NIT2	Q9NQR4	0	0	0	1	FALSE	Not applicable	Not applicable	Not applicable	Not applicable
NLGN1	Neuroligin-1	Q8N2Q7	1	1	0	1	FALSE	Not applicable	Not applicable	Not applicable	Not applicable
NLGN2	Neuroligin-2	Q8NFZ4	0	0	0	1	FALSE	Not applicable	Not applicable	Not applicable	Not applicable
NME1	Nucleoside diphosphate kinase A	P15531	0	0	0	1	FALSE	Not applicable	Not applicable	Not applicable	Not applicable
NME3	Nucleoside diphosphate kinase 3	Q13232	0	0	0	1	TRUE	0	0	0	1
NMI	N-myc-interactor	Q13287	0	0	0	1	FALSE	Not applicable	Not applicable	Not applicable	Not applicable
NMNAT1	Nicotinamide/nicotinic acid mononucleotide adenylyltransferase 1	Q9HAN9	0	0	0	1	TRUE	0	0	0	1
NMRK2	Nicotinamide riboside kinase 2	Q9NPI5	0	0	0	1	FALSE	Not applicable	Not applicable	Not applicable	Not applicable
NMT1	Glycylpeptide N-tetradecanoyltransferase 1	P30419	0	0	0	1	FALSE	Not applicable	Not applicable	Not applicable	Not applicable
NOMO1	Nodal modulator 1	Q15155	0	0	0	1	TRUE	0	0	0	1
NOP56	Nucleolar protein 56	O00567	0	0	0	1	FALSE	Not applicable	Not applicable	Not applicable	Not applicable
NOS1	Nitric oxide synthase, brain	P29475	0	1	0	1	TRUE	0	1	0	1
NOS2	Nitric oxide synthase, inducible	P35228	0	1	0	1	FALSE	Not applicable	Not applicable	Not applicable	Not applicable
NOS3	Nitric oxide synthase, endothelial	P29474	0	1	1	1	TRUE	0	1	1	1
NOTCH1	Neurogenic locus notch homolog protein 1	P46531	0	1	1	1	TRUE	0	1	1	1
NOTCH2	Neurogenic locus notch homolog protein 2	Q04721	0	0	0	1	FALSE	Not applicable	Not applicable	Not applicable	Not applicable
NOTCH3	Neurogenic locus notch homolog protein 3	Q9UM47	1	1	1	1	TRUE	1	1	1	1
NPC2	NPC intracellular cholesterol transporter 2	P61916	0	0	0	1	FALSE	Not applicable	Not applicable	Not applicable	Not applicable
NPDC1	Neural proliferation differentiation and control protein 1	Q9NQX5	0	0	0	1	TRUE	0	0	0	1
NPHS1	Nephrin	O60500	0	0	0	1	FALSE	Not applicable	Not applicable	Not applicable	Not applicable
NPHS2	Podocin	Q9NP85	0	1	1	1	FALSE	Not applicable	Not applicable	Not applicable	Not applicable
NPL	N-acetylneuraminate lyase	Q9BXD5	0	0	1	1	FALSE	Not applicable	Not applicable	Not applicable	Not applicable
NPM1	Nucleophosmin	P06748					TRUE
NPPB	Natriuretic peptides B	P16860	0	1	1	1	TRUE	0	1	1	1
NPPC	C-type natriuretic peptide	P23582	0	1	0	1	TRUE	0	1	0	1
NPR1	Atrial natriuretic peptide receptor 1	P16066	1	0	0	1	FALSE	Not applicable	Not applicable	Not applicable	Not applicable
NPTN	Neuroplastin	Q9Y639	0	0	0	1	TRUE	0	0	0	1
NPTX1	Neuronal pentraxin-1	Q15818	0	0	0	1	TRUE	0	0	0	1
NPTX2	Neuronal pentraxin-2	P47972	0	0	1	1	FALSE	Not applicable	Not applicable	Not applicable	Not applicable
NPTXR	Neuronal pentraxin receptor	O95502	1	0	0	1	TRUE	1	0	0	1
NPY	Pro-neuropeptide Y	P01303	0	1	0	1	TRUE	0	1	0	1
NRCAM	Neuronal cell adhesion molecule	Q92823	0	0	0	1	TRUE	0	0	0	1
NRGN	Neurogranin	Q92686	1	0	0	1	FALSE	Not applicable	Not applicable	Not applicable	Not applicable
NRN1	Neuritin	Q9NPD7	0	0	0	1	FALSE	Not applicable	Not applicable	Not applicable	Not applicable
NRP1	Neuropilin-1	O14786	0	1	0	1	TRUE	0	1	0	1
NRP2	Neuropilin-2	O60462	0	1	0	1	TRUE	0	1	0	1
NRTN	Neurturin	Q99748	0	0	0	1	TRUE	0	0	0	1
NRXN3	Neurexin-3	Q9Y4C0	0	0	0	1	FALSE	Not applicable	Not applicable	Not applicable	Not applicable
NSFL1C	NSFL1 cofactor p47	Q9UNZ2	0	0	0	1	TRUE	0	0	0	1
NT5C	5'(3')-deoxyribonucleotidase, cytosolic type	Q8TCD5	0	0	0	1	FALSE	Not applicable	Not applicable	Not applicable	Not applicable
NT5C1A	Cytosolic 5'-nucleotidase 1A	Q9BXI3	0	1	0	1	FALSE	Not applicable	Not applicable	Not applicable	Not applicable
NT5C3A	Cytosolic 5'-nucleotidase 3A	Q9H0P0	0	0	0	1	TRUE	0	0	0	1
NT5E	5'-nucleotidase	P21589	1	1	0	1	TRUE	1	1	0	1
NTF3	Neurotrophin-3	P20783	1	0	0	1	TRUE	1	0	0	1
NTF4	Neurotrophin-4	P34130	0	0	0	1	TRUE	0	0	0	1
NTproBNP	N-terminal prohormone of brain natriuretic peptide	NTproBNP	0	0	1	1	TRUE	0	0	1	1
NTRK2	BDNF/NT-3 growth factors receptor	Q16620	0	0	1	1	TRUE	0	0	1	1
NTRK3	NT-3 growth factor receptor	Q16288	1	1	1	1	TRUE	1	1	1	1
NUB1	NEDD8 ultimate buster 1	Q9Y5A7	0	0	0	1	TRUE	0	0	0	1
NUBP1	Cytosolic Fe-S cluster assembly factor NUBP1	P53384	0	0	0	1	FALSE	Not applicable	Not applicable	Not applicable	Not applicable
NUCB2	Nucleobindin-2	P80303	0	0	0	1	TRUE	0	0	0	1
NUDC	Nuclear migration protein nudC	Q9Y266	0	0	0	1	TRUE	0	0	0	1
NUDT10	Diphosphoinositol polyphosphate phosphohydrolase 3-alpha	Q8NFP7	0	0	0	1	FALSE	Not applicable	Not applicable	Not applicable	Not applicable
NUDT15	Nucleotide triphosphate diphosphatase NUDT15	Q9NV35	0	0	0	1	FALSE	Not applicable	Not applicable	Not applicable	Not applicable
NUDT16	U8 snoRNA-decapping enzyme	Q96DE0	0	0	1	1	FALSE	Not applicable	Not applicable	Not applicable	Not applicable
NUDT2	Bis(5'-nucleosyl)-tetraphosphatase [asymmetrical]	P50583	0	0	0	1	TRUE	0	0	0	1
NUDT5	ADP-sugar pyrophosphatase	Q9UKK9	0	0	0	1	TRUE	0	0	0	1
NUMB	Protein numb homolog	P49757	0	1	1	1	FALSE	Not applicable	Not applicable	Not applicable	Not applicable
NUP50	Nuclear pore complex protein Nup50	Q9UKX7	0	0	0	1	FALSE	Not applicable	Not applicable	Not applicable	Not applicable
NXPE4	NXPE family member 4	Q6UWF7	0	0	0	1	FALSE	Not applicable	Not applicable	Not applicable	Not applicable
NXPH1	Neurexophilin-1	P58417	0	1	0	1	TRUE	0	1	0	1
NXPH3	Neurexophilin-3	O95157	1	0	1	1	FALSE	Not applicable	Not applicable	Not applicable	Not applicable
OBP2B	Odorant-binding protein 2b	Q9NPH6	0	0	0	1	TRUE	0	0	0	1
OCLN	Occludin	Q16625	0	0	0	1	FALSE	Not applicable	Not applicable	Not applicable	Not applicable
ODAM	Odontogenic ameloblast-associated protein	A1E959	0	0	0	1	TRUE	0	0	0	1
OFD1	Oral-facial-digital syndrome 1 protein	O75665	0	1	0	1	FALSE	Not applicable	Not applicable	Not applicable	Not applicable
OGA	Protein O-GlcNAcase	O60502	0	1	0	1	FALSE	Not applicable	Not applicable	Not applicable	Not applicable
OGFR	Opioid growth factor receptor	Q9NZT2	0	0	0	1	TRUE	0	0	0	1
OGN	Mimecan	P20774	1	0	0	1	TRUE	1	0	0	1
OGT	UDP-N-acetylglucosamine--peptide N-acetylglucosaminyltransferase 110 kDa subunit	O15294	0	0	0	1	FALSE	Not applicable	Not applicable	Not applicable	Not applicable
OLFM4	Olfactomedin-4	Q6UX06	0	1	0	1	FALSE	Not applicable	Not applicable	Not applicable	Not applicable
OLR1	Oxidized low-density lipoprotein receptor 1	P78380	0	1	0	1	TRUE	0	1	0	1
OMD	Osteomodulin	Q99983	1	0	1	1	TRUE	1	0	1	1
OMG	Oligodendrocyte-myelin glycoprotein	P23515	0	0	1	1	TRUE	0	0	1	1
OMP	Olfactory marker protein	P47874	0	0	0	1	FALSE	Not applicable	Not applicable	Not applicable	Not applicable
OPHN1	Oligophrenin-1	O60890	0	0	0	1	FALSE	Not applicable	Not applicable	Not applicable	Not applicable
OPLAH	5-oxoprolinase	O14841	0	0	1	1	FALSE	Not applicable	Not applicable	Not applicable	Not applicable
OPTC	Opticin	Q9UBM4	0	0	0	1	TRUE	0	0	0	1
ORM1	Alpha-1-acid glycoprotein 1	P02763	0	0	1	1	FALSE	Not applicable	Not applicable	Not applicable	Not applicable
OSBPL2	Oxysterol-binding protein-related protein 2	Q9H1P3	0	0	0	1	FALSE	Not applicable	Not applicable	Not applicable	Not applicable
OSCAR	Osteoclast-associated immunoglobulin-like receptor	Q8IYS5	0	1	0	1	TRUE	0	1	0	1
OSM	Oncostatin-M	P13725	0	0	1	1	TRUE	0	0	1	1
OSMR	Oncostatin-M-specific receptor subunit beta	Q99650	0	0	0	1	TRUE	0	0	0	1
OSTN	Osteocrin	P61366	0	0	0	1	FALSE	Not applicable	Not applicable	Not applicable	Not applicable
OTOA	Otoancorin	Q7RTW8	0	0	0	1	FALSE	Not applicable	Not applicable	Not applicable	Not applicable
OTUD6B	Deubiquitinase OTUD6B	Q8N6M0	0	0	0	1	FALSE	Not applicable	Not applicable	Not applicable	Not applicable
OTUD7B	OTU domain-containing protein 7B	Q6GQQ9	0	1	0	1	FALSE	Not applicable	Not applicable	Not applicable	Not applicable
OXCT1	Succinyl-CoA:3-ketoacid coenzyme A transferase 1, mitochondrial	P55809	0	0	0	1	FALSE	Not applicable	Not applicable	Not applicable	Not applicable
OXT	Oxytocin-neurophysin 1	P01178	0	0	0	1	TRUE	0	0	0	1
P4HB	Protein disulfide-isomerase	P07237	0	1	0	1	TRUE	0	1	0	1
PACS2	Phosphofurin acidic cluster sorting protein 2	Q86VP3	0	0	0	1	FALSE	Not applicable	Not applicable	Not applicable	Not applicable
PADI2	Protein-arginine deiminase type-2	Q9Y2J8	0	0	0	1	TRUE	0	0	0	1
PADI4	Protein-arginine deiminase type-4	Q9UM07	0	1	0	1	TRUE	0	1	0	1
PAEP	Glycodelin	P09466	0	1	0	1	TRUE	0	1	0	1
PAFAH1B3	Platelet-activating factor acetylhydrolase IB subunit alpha1	Q15102	0	0	0	1	FALSE	Not applicable	Not applicable	Not applicable	Not applicable
PAFAH2	Platelet-activating factor acetylhydrolase 2, cytoplasmic	Q99487	0	0	0	1	FALSE	Not applicable	Not applicable	Not applicable	Not applicable
PAG1	Phosphoprotein associated with glycosphingolipid-enriched microdomains 1	Q9NWQ8	0	0	0	1	TRUE	0	0	0	1
PAGR1	PAXIP1-associated glutamate-rich protein 1	Q9BTK6	0	0	0	1	FALSE	Not applicable	Not applicable	Not applicable	Not applicable
PAIP2B	Polyadenylate-binding protein-interacting protein 2B	Q9ULR5	0	0	0	1	FALSE	Not applicable	Not applicable	Not applicable	Not applicable
PAK4	Serine/threonine-protein kinase PAK 4	O96013	0	0	0	1	TRUE	0	0	0	1
PALLD	Palladin	Q8WX93	1	1	0	1	FALSE	Not applicable	Not applicable	Not applicable	Not applicable
PALM	Paralemmin-1	O75781	0	0	0	1	FALSE	Not applicable	Not applicable	Not applicable	Not applicable
PALM2	Paralemmin-2	Q8IXS6	1	1	0	1	FALSE	Not applicable	Not applicable	Not applicable	Not applicable
PALM3	Paralemmin-3	A6NDB9	0	0	0	1	FALSE	Not applicable	Not applicable	Not applicable	Not applicable
PAM	Peptidyl-glycine alpha-amidating monooxygenase	P19021	1	0	0	1	TRUE	1	0	0	1
PAMR1	Inactive serine protease PAMR1	Q6UXH9	0	0	1	1	TRUE	0	0	1	1
PAPPA	Pappalysin-1	Q13219	1	1	0	1	TRUE	1	1	0	1
PARD3	Partitioning defective 3 homolog	Q8TEW0	0	0	0	1	FALSE	Not applicable	Not applicable	Not applicable	Not applicable
PARK7	Parkinson disease protein 7	Q99497	0	0	0	1	TRUE	0	0	0	1
PARP1	Poly [ADP-ribose] polymerase 1	P09874	0	1	0	1	TRUE	0	1	0	1
PAXX	Protein PAXX	Q9BUH6	0	0	0	1	FALSE	Not applicable	Not applicable	Not applicable	Not applicable
PBK	Lymphokine-activated killer T-cell-originated protein kinase	Q96KB5	0	0	0	1	FALSE	Not applicable	Not applicable	Not applicable	Not applicable
PBLD	Phenazine biosynthesis-like domain-containing protein	P30039	0	0	0	1	TRUE	0	0	0	1
PBXIP1	Pre-B-cell leukemia transcription factor-interacting protein 1	Q96AQ6	0	0	0	1	FALSE	Not applicable	Not applicable	Not applicable	Not applicable
PCARE	Photoreceptor cilium actin regulator	A6NGG8	0	0	0	1	FALSE	Not applicable	Not applicable	Not applicable	Not applicable
PCBD1	Pterin-4-alpha-carbinolamine dehydratase	P61457	0	1	0	1	FALSE	Not applicable	Not applicable	Not applicable	Not applicable
PCBP2	Poly(rC)-binding protein 2	Q15366	0	0	0	1	FALSE	Not applicable	Not applicable	Not applicable	Not applicable
PCDH1	Protocadherin-1	Q08174	0	1	0	1	TRUE	0	1	0	1
PCDH12	Protocadherin-12	Q9NPG4	0	0	1	1	FALSE	Not applicable	Not applicable	Not applicable	Not applicable
PCDH17	Protocadherin-17	O14917	0	0	0	1	TRUE	0	0	0	1
PCDH7	Protocadherin-7	O60245	1	1	0	1	FALSE	Not applicable	Not applicable	Not applicable	Not applicable
PCDH9	Protocadherin-9	Q9HC56	0	0	1	1	FALSE	Not applicable	Not applicable	Not applicable	Not applicable
PCDHB15	Protocadherin beta-15	Q9Y5E8	0	0	0	1	FALSE	Not applicable	Not applicable	Not applicable	Not applicable
PCNA	Proliferating cell nuclear antigen	P12004	0	1	0	1	FALSE	Not applicable	Not applicable	Not applicable	Not applicable
PCOLCE	Procollagen C-endopeptidase enhancer 1	Q15113					TRUE
PCSK7	Proprotein convertase subtilisin/kexin type 7	Q16549	0	0	0	1	FALSE	Not applicable	Not applicable	Not applicable	Not applicable
PCSK9	Proprotein convertase subtilisin/kexin type 9	Q8NBP7	0	1	1	1	TRUE	0	1	1	1
PCYT2	Ethanolamine-phosphate cytidylyltransferase	Q99447	0	0	0	1	FALSE	Not applicable	Not applicable	Not applicable	Not applicable
PDAP1	28 kDa heat- and acid-stable phosphoprotein	Q13442	0	0	0	1	FALSE	Not applicable	Not applicable	Not applicable	Not applicable
PDCD1	Programmed cell death protein 1	Q15116	0	0	0	1	TRUE	0	0	0	1
PDCD1LG2	Programmed cell death 1 ligand 2	Q9BQ51	0	1	0	1	TRUE	0	1	0	1
PDCD5	Programmed cell death protein 5	O14737	0	0	0	1	TRUE	0	0	0	1
[truncated: 925 more rows]

[truncated: 9 more sheets: Supplemental Table S11, Supplemental Table S12, Supplemental Table S13, Supplemental Table S14, Supplemental Table S15, Supplemental Table S16, Supplemental Table S17, Supplemental Table S18, Supplemental Table S19]
